# Supplementary material
Source: Royal Society of Chemistry journal article supplement (doi:10.1039/d6dt00728g)
Supplement: d6dt00728g1.pdf [file d6dt00728g1.pdf]

## **CO<sub>2</sub> Photoreduction by 4-Ferrocenyl Appended Bipyridine Coordinated Re(I) Complexes**

Shriya Saha<sup>a</sup>, Dolores G. Gil-Gavilán<sup>b</sup>, Matthias J. Gutmann<sup>c</sup>, Debasish Manna<sup>d</sup>,  
Souvik Roy<sup>\*b</sup>, Raja Mitra<sup>\*a,c</sup>

<sup>a</sup>School of Chemical and Materials Sciences, Indian Institute of Technology Goa, Farmagudi, Goa 403401, India. Email: [rajamitra@iitgoa.ac.in](mailto:rajamitra@iitgoa.ac.in)

<sup>b</sup>School of Natural Sciences, University of Lincoln, Green Lane, Lincoln, Lincolnshire, LN6 7DL, UK.

<sup>c</sup>Rutherford Appleton Laboratory, ISIS Facility, Chilton Didcot, Oxfordshire OX11 0QX, UK.

<sup>d</sup>Department of Chemistry, Indian Institute of Science Education and Research Bhopal, Bhopal, MP 462066, India

<sup>e</sup>Center of Excellence in Sustainable Energy, Indian Institute of Technology Goa, Ponda, Goa – 403401, India

**Table of Contents:**

| <b>Topics</b>                                                                                 | <b>Page Number</b> |
|-----------------------------------------------------------------------------------------------|--------------------|
| <i>Materials and methods</i>                                                                  | S3                 |
| <i>Instrumentation</i>                                                                        | S3                 |
| <i>R<sub>f</sub> value calculation from TLC</i>                                               | S4                 |
| <i>Synthesis and Characterisation</i>                                                         |                    |
| <i>Chalcone intermediates (1a–d)</i>                                                          | S5–S6              |
| <i>Ligands (2a–e) and by-product (2d')</i>                                                    | S6–S10             |
| <i>Re(I) complexes (3a–e)</i>                                                                 | S11–S14            |
| <i>ATR-IR spectra of 1a–d</i>                                                                 | S15–S16            |
| <i>NMR, mass spectra, and HPLC-MS profiles of 1a–d</i>                                        | S17–S26            |
| <i>Absorption spectra of 1a–d</i>                                                             | S27–S28            |
| <i>Single crystal data of 2c and 2d'</i>                                                      | S29–S32            |
| <i>Thermogravimetric profile and ATR-IR spectra of 2a–e and 2d'</i>                           | S33–S36            |
| <i>NMR, mass spectra, and HPLC-MS profiles of 2a–e and 2d'</i>                                | S37–S56            |
| <i>Absorption spectra of 2a–e and 2d'</i>                                                     | S57–S59            |
| <i>Single crystal data of 3e</i>                                                              | S61–S63            |
| <i>Thermogravimetric profile and ATR-IR spectra of 3a–e</i>                                   | S64–S67            |
| <i>NMR, mass spectra, and HPLC-MS profiles of 3a–e</i>                                        | S68–S87            |
| <i>Absorption spectra of 3a–e</i>                                                             | S88–S91            |
| <i>Cyclic voltammograms of ligands under argon</i>                                            | S92                |
| <i>Scan rate-dependent cyclic voltammograms of 3a–e under argon</i>                           | S93–S95            |
| <i>Cyclic voltammograms of 3a–e under CO<sub>2</sub>-saturated conditions in acetonitrile</i> | S95–S97            |
| <i>Catalytic parameters of 3a–e</i>                                                           | S97                |
| <i>IR-spectroelectrochemical spectra of 3a–e under argon</i>                                  | S98                |
| <i>Intermediates detected from IRSEC</i>                                                      | S99                |
| <i>Photocatalytic CO<sub>2</sub> reduction data</i>                                           | S99–S100           |
| <i>References</i>                                                                             | S101               |

## Methods and Materials

Ethanol (99%) was received from LabChem; toluene and diethyl ether were received from SRL Chemicals. Ethanol and diethyl ether were used as received, and toluene was dried over sodium prior to use. Ferrocene carboxaldehyde and 1-acetonilpyridiniumchloride were purchased from BLD Pharma India Pvt. Ltd. Ammonium acetate (NH<sub>4</sub>OAc) and potassium hydroxide (KOH) were purchased from SRL Chemicals. Rheniumpentacarbonyl bromide [Re(CO)<sub>5</sub>Br] was purchased from Sigma-Aldrich. All reagents were used as received. The synthesis of all metal complexes was carried out using the Schlenk technique<sup>1</sup>. Filtration and other manipulations were performed in open air. For the cyclic voltammetric measurements, acetonitrile was dried over phosphorus pentoxide.

## Instrumentation

The melting points of the ligands were recorded using a DBK-programmable melting point apparatus (max = 320 °C). <sup>1</sup>H and <sup>13</sup>C {<sup>1</sup>H} NMR spectra were acquired on a Bruker ASCEND™ spectrometer using 400 MHz (<sup>1</sup>H NMR) in CDCl<sub>3</sub> (δ = 7.26 ppm); DMSO-d<sub>6</sub> (δ = 2.50 ppm) or 101 MHz (<sup>13</sup>C {<sup>1</sup>H} NMR) in CDCl<sub>3</sub> (δ = 77.1 ppm); and DMSO-d<sub>6</sub> (δ = 39.5 ppm) at 298 K. Multiplicities of the signals are reported using the following abbreviations: s, singlet; d, doublet; dd, doublet of doublet; t, triplet; dt, doublet of triplet; m, multiplet; br, broad. Structural assignments were made using additional information from <sup>1</sup>H-<sup>1</sup>H COSY, <sup>1</sup>H-<sup>13</sup>C HSQC, and <sup>1</sup>H-<sup>13</sup>C HMBC correlation experiments. The UV-vis absorption spectral measurements of ligands and complexes in spectroscopic grade acetonitrile solution were performed with a JASCO-V-770 UV-visible/NIR double-beam spectrophotometer. In the ATR mode, the infrared (IR) spectra were recorded using a Shimadzu IRAffinity-1S spectrophotometer (40 scans, scanned in 4000–400 cm<sup>-1</sup>, resolution 4 cm<sup>-1</sup>). Reverse-phase HPLC was performed on a C18 column (100 mm × 2.1 mm i.d., 3 μm), maintained at 40 °C, using aqueous methanol/acetonitrile gradients containing 1% ammonium formate as the mobile phase with a flow rate of 0.2 mL min<sup>-1</sup>. Unless otherwise stated, a photodiode array (PDA) detector set at 254 nm was used. Mass spectra were recorded using a JOEL Japan-AccuTOF GCV mass spectrometer (IIT Bombay), Bruker MicroTOF QII LC-HRMS (IISER Bhopal), and Water's XEVO G2 QToF (IISER Berhampur). Elemental analysis was done using a varioMICRO CHNS analyzer (IISER Bhopal). Thermogravimetry of the complexes was carried out using a NETZSCH TG 209F1 Libra thermoanalyzer, in the temperature range of 25–600 °C, with a heating rate of 10 Kmin<sup>-1</sup>, under a nitrogen environment. Electrochemical analysis was performed using a CHI1200C

potentiostat. Cyclic voltammetry measurements were performed in a one-compartment, three-electrode setup using a glassy carbon working electrode (3 mm diameter), a platinum wire as the counter electrode, and a non-aqueous Ag|Ag<sup>+</sup> pseudo-reference electrode, Ag|AgNO<sub>3</sub> (10 mM) in 0.1 M *n*-Bu<sub>4</sub>NBF<sub>4</sub> in acetonitrile. The voltammograms were referenced by adding ferrocene as an internal standard after the final experiment, and all potentials given in this work are reported against the Fc<sup>+0</sup> couple. The potential of the Fc<sup>+0</sup> couple was found to be in the range of 0.07 to 0.09 V vs. the non-aqueous Ag|Ag<sup>+</sup> pseudo-reference. The supporting electrolyte was *n*-Bu<sub>4</sub>NBF<sub>4</sub> (0.1 M), purified by recrystallization from 1 : 2 ethanol/water followed by drying at 80 °C in a hot air oven. Single crystal analysis: By the vapor diffusion technique, single crystals of C<sub>22</sub>H<sub>22</sub>FeN<sub>2</sub> (**2c**) were obtained from a mixture of chloroform and *n*-hexane. A suitable crystal was selected and diffracted on a Bruker APEX-II CCD diffractometer. The crystal was kept at 140.0 K during data collection. Using Olex2<sup>2-4</sup>, the structure was solved with the Olex2.solve structure solution program using Charge Flipping and refined with the olex2.refine refinement package using Gauss-Newton minimisation and the ORTEP<sup>5,6</sup> diagram was drawn using the MERCURY<sup>7</sup> software provided by CSD.

### R<sub>f</sub> value calculation from TLC

Silica-coated alumina plates are used to monitor the reactions and calculate the R<sub>f</sub> values of **1a–d** and **2a–d**. A TLC with spotting of ferrocene carboxaldehyde (**1**), chalcone intermediate (**2**; **1d**), and the corresponding bipyridine derivative (**3**; **2d**) is done as an example to show the calculation of R<sub>f</sub> values of each compound. The mobile phase used for TLC was ethyl acetate: pet ether (10% v/v).

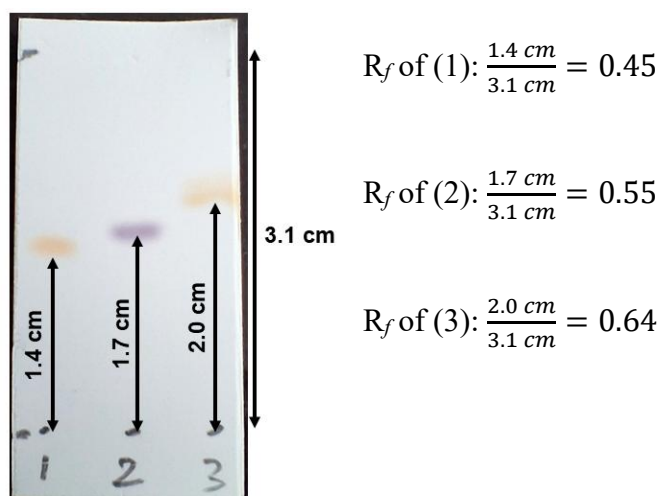

## Synthesis and Characterisation

### Synthesis of **1a–d**:

In a round-bottom flask with a stirbar, 2-acetylpyridine (1.00 equiv.) was dissolved in 2.0 mL of ethanol (EtOH), followed by the addition of KOH (3.33 equiv.). The solution was stirred until the color changed from colorless to slightly orange. Ferrocene carboxaldehyde (1.00 equiv.) was added and stirred at 40 °C for 2 hours. For **1a** & **1d**, the crude product was obtained as a precipitate, filtered, washed with water, and dried under the air. The crude product was then loaded on a silica column (by dissolving in a minimum amount of DCM and then adsorbing on dry silica) and eluted with 2% ethyl acetate to remove the trace impurities. For **1b** and **1c**, no precipitate formation was observed. EtOH was removed under vacuum (complete removal is necessary for a better yield), and the crude mixture was directly loaded onto the silica column. The pure product was obtained using 2% ethyl acetate: pet ether as the eluent.

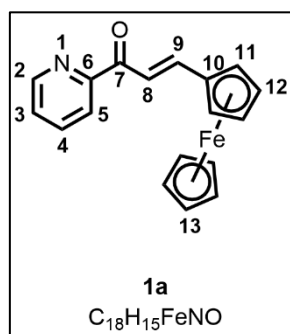

Yield: 92% (650 mg, 2.04 mmol).  $R_f$  0.53 (mobile phase: ethyl acetate: pet ether, 10% v/v). M.P.: 157 °C (Lit. value<sup>8</sup>: 160–161 °C). <sup>1</sup>H NMR (400 MHz, CDCl<sub>3</sub>)  $\delta$  (ppm): 8.73 (dt,  $J = 4.0$  & 1.0 Hz, 1H,  $H_2$ ), 8.18 (dt,  $J = 7.6$  & 1.0 Hz, 1H,  $H_5$ ), 7.93–7.82 (merged, 3H,  $H_3$ ,  $H_8$  &  $H_9$ ), 7.45 (ddd,  $J = 7.5$ , 4.9 & 1.0 Hz, 1H,  $H_4$ ), 4.67 (s, 2H,  $H_{11}$ ), 4.49 (s, 2H,  $H_{12}$ ), 4.18 (s, 5H,  $H_{13}$ ). <sup>13</sup>C{<sup>1</sup>H} NMR (101 MHz, CDCl<sub>3</sub>)  $\delta$  (ppm): 188.5 ( $C_7$ ), 154.7 ( $C_6$ ), 148.7 ( $C_9$ ), 147.2 ( $C_2$ ), 136.9 ( $C_4$ ), 126.5 ( $C_3$ ), 122.9 ( $C_5$ ), 117.8 ( $C_8$ ), 79.4 ( $C_{10}$ ), 71.5 ( $C_{12}$ ), 69.8 ( $C_{13}$ ), 69.4 ( $C_{11}$ ). The <sup>1</sup>H and <sup>13</sup>C{<sup>1</sup>H} values match those in previous reports<sup>9</sup>. ATR-IR ( $\nu$  cm<sup>-1</sup>): 3102, 1696, 1662, 1590, 1569, 1318, 1010, 749. UV-vis ( $\lambda$  nm /  $\epsilon \times 10^6$  M<sup>-1</sup>cm<sup>-1</sup>): 273 (0.38), 329 (0.56), 400 (0.10), 515 (0.12). RP-HPLC: 2.186 min (methanol and 1% ammonium formate in water) 95 : 5 (v/v). HRMS ( $m/z$ ): calcd for [M+H<sup>+</sup>] 318.0622, found for [M+H<sup>+</sup>] 318.0569.

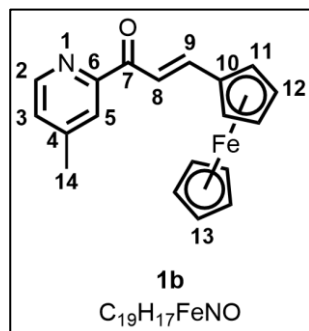

Yield: 65% (480 mg, 1.45 mmol).  $R_f$  0.55 (mobile phase: ethyl acetate: pet ether, 10% v/v). <sup>1</sup>H NMR (400 MHz, CDCl<sub>3</sub>)  $\delta$  (ppm): 8.58 (d,  $J = 4.3$  Hz, 1H,  $H_2$ ), 8.00 (s, 1H,  $H_5$ ), 7.86 (dd,  $J = 15.5$  Hz, 2H,  $H_8$  &  $H_9$ ), 7.28 (d,  $J = 4.2$  Hz, 1H,  $H_3$ ), 4.67 (s, 2H,  $H_{11}$ ), 4.48 (s, 2H,  $H_{12}$ ), 4.17 (s, 5H,  $H_{13}$ ), 2.44 (s, 3H,  $H_{14}$ ). <sup>13</sup>C{<sup>1</sup>H} NMR (101 MHz, CDCl<sub>3</sub>)  $\delta$  (ppm): 188.9 ( $C_7$ ), 157.8 ( $C_6$ ), 154.2 ( $C_2$ ), 146.7 ( $C_4$ ), 137.0 ( $C_9$ ), 126.2 ( $C_3$ ), 120.0 ( $C_5$ ), 118.2 ( $C_8$ ), 79.7 ( $C_{10}$ ), 71.4 ( $C_{12}$ ), 69.8 ( $C_{13}$ ), 69.4 ( $C_{11}$ ), 24.6 ( $C_{14}$ ).

ATR-IR ( $\nu$   $\text{cm}^{-1}$ ): 3085, 1692, 1654, 1577, 1297, 1109, 817. UV-vis ( $\lambda$  nm /  $\epsilon \times 10^6 \text{ M}^{-1}\text{cm}^{-1}$ ): 271 (0.75), 327 (0.82), 395 (0.17), 507 (0.16). RP-HPLC: 6.536 min (methanol and 1% ammonium formate in water) 95 : 5 ( $v/v$ ). HRMS ( $m/z$ ): calcd for  $[\text{M}+\text{H}^+]$  332.0779; found for  $[\text{M}+\text{H}^+]$  332.0726.

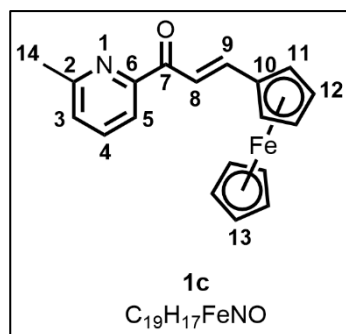

Yield: 68% (500 mg, 1.51 mmol).  $R_f$  0.55 (mobile phase: ethyl acetate: pet ether, 10%  $v/v$ ). M.P.: 143 °C.  $^1\text{H}$  NMR (400 MHz,  $\text{CDCl}_3$ )  $\delta$  (ppm): 7.98 (d,  $J = 7.8$  Hz, 1H,  $H_5$ ), 7.87 (br, 2H,  $H_8$  &  $H_9$ ), 7.73 (t,  $J = 7.9$  Hz, 1H,  $H_4$ ), 7.32 (d,  $J = 7.9$  Hz, 1H,  $H_3$ ), 4.67 (s, 2H,  $H_{11}$ ), 4.49 (s, 2H,  $H_{12}$ ), 4.19 (s, 5H,  $H_{13}$ ), 2.67 (s, 3H,  $H_{14}$ ).  $^{13}\text{C}\{^1\text{H}\}$  NMR (101 MHz,  $\text{CDCl}_3$ )  $\delta$  (ppm): 188.9 ( $C_7$ ), 157.8 ( $C_2$ ), 154.2 ( $C_6$ ), 146.7 ( $C_9$ ), 137.0 ( $C_4$ ), 126.2 ( $C_3$ ), 120.0 ( $C_5$ ), 118.2 ( $C_8$ ), 79.7 ( $C_{10}$ ), 71.4 ( $C_{12}$ ), 69.8 ( $C_{13}$ ), 69.4 ( $C_{11}$ ), 24.6 ( $C_{14}$ ). ATR-IR ( $\nu$   $\text{cm}^{-1}$ ): 3098, 1678, 1654, 1573, 1445, 1103, 808. UV-vis ( $\lambda$  nm /  $\epsilon \times 10^6 \text{ M}^{-1}\text{cm}^{-1}$ ): 282 (0.56), 328 (0.82), 396 (0.13), 512 (0.15). RP-HPLC: 7.115 min (methanol and 1% ammonium formate in water) 95 : 5 ( $v/v$ ). HRMS ( $m/z$ ): calcd for  $[\text{M}+\text{H}^+]$  332.0779, found for  $[\text{M}+\text{H}^+]$  332.0735.

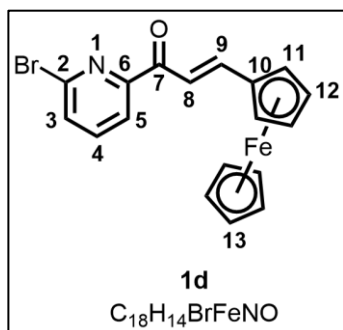

Yield: 90% (795 mg, 2.04 mmol).  $R_f$  0.55 (mobile phase: ethyl acetate: pet ether, 10%  $v/v$ ). M.P.: 187 °C.  $^1\text{H}$  NMR (400 MHz,  $\text{CDCl}_3$ )  $\delta$  (ppm): 8.13 (d,  $J = 7.2$  Hz, 1H,  $H_5$ ), 7.91 (d,  $J = 15.6$  Hz, 1H,  $H_9$ ), 7.70 (merged, 3H,  $H_3$ ,  $H_4$  &  $H_8$ ), 4.69 (s, 2H,  $H_{11}$ ), 4.53 (s, 2H,  $H_{12}$ ), 4.20 (s, 5H,  $H_{13}$ ).  $^1\text{H}$  NMR spectrum matched the reported values<sup>10</sup>.  $^{13}\text{C}\{^1\text{H}\}$  NMR (101 MHz,  $\text{CDCl}_3$ )  $\delta$  (ppm): 186.8 ( $C_7$ ), 155.6 ( $C_6$ ), 148.2 ( $C_2$ ), 141.2 ( $C_9$ ), 139.2 ( $C_4$ ), 131.1 ( $C_3$ ), 121.7 ( $C_5$ ), 117.2 ( $C_8$ ), 79.2 ( $C_{10}$ ), 71.8 ( $C_{12}$ ), 69.9 ( $C_{13}$ ), 69.6 ( $C_{11}$ ). ATR-IR ( $\nu$   $\text{cm}^{-1}$ ): 3101, 1683, 1650, 1573, 1314, 1038, 800. UV-vis ( $\lambda$  nm /  $\epsilon \times 10^6 \text{ M}^{-1}\text{cm}^{-1}$ ): 287 (0.48), 334 (0.80), 409 (0.12), 530 (0.19). RP-HPLC: 2.649 min (methanol and 1% ammonium formate in water) 95 : 5 ( $v/v$ ). HRMS ( $m/z$ ): calcd for  $[\text{M}+\text{H}^+]$  395.9728, found for  $[\text{M}+\text{H}^+]$  395.9676, and calcd for  $[\text{M}+\text{Na}^+]$  417.9552, found for  $[\text{M}+\text{Na}^+]$  417.9498.

#### Synthesis of **2a–d**:

To a round bottom flask with a stirbar, **1a–d** (1.00 equiv.) was added and stirred with 4.0 mL of EtOH for 15 min. 1-acetylpyridiniumchloride (1.00 equiv.) was added to the chalcone by

dissolving it in 4.0 mL of EtOH. Solid NH<sub>4</sub>OAc (50.0 equiv.) and further 5.0 mL of EtOH were added to the reaction mixture properly (vigorous stirring is required to ensure better yield). The contents were refluxed (an air condenser was attached to the flask for refluxing) for 20 h and monitored using thin-layer chromatography (TLC). If the chalcone was unreacted, the reaction was continued for another 16 h. After cooling the reaction, EtOH was removed under high vacuum (0.120 mbar at rt for 2 h; a necessary step for better yield), and the obtained solid was directly loaded onto a silica column for purification. The pure product was eluted with 5% ethyl acetate: pet ether. The orange-colored solid obtained was washed thrice (3 × 10 mL) with chloroform (to remove any eluent impurities) before applying vacuum (0.120 mbar at rt for 1 h) to remove any trace amount of eluting solvent.

One-pot synthesis of **2a–d** from 2-acetylpyridine: To a round bottom flask with a stirbar, 2-acetylpyridine (1.00 equiv.) with 2.0 mL of EtOH is added, followed by KOH (3.33 equiv.). The solution was stirred for 10 min, and ferrocene carboxaldehyde (1.00 equiv.) was added, and the reaction mixture was stirred at 40 °C for 2 h. 1-acetylpyridiniumchloride (1.00 equiv.) was added to the same flask by dissolving it in 5.0 mL of EtOH. Solid NH<sub>4</sub>OAc (50.0 equiv.) was added along with an additional 8.0 mL of EtOH to ensure proper stirring, and the reaction mixture was stirred for 20 h under refluxing conditions. The reaction was monitored by TLC, and purification was performed as mentioned.

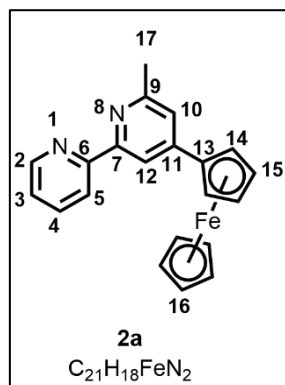

Yield: 46% (257 mg, 0.73 mmol). *R<sub>f</sub>* 0.62 (mobile phase: ethyl acetate: pet ether, 10% v/v). M.P.: 112 °C. <sup>1</sup>H NMR (400 MHz, CDCl<sub>3</sub>) δ (ppm): 8.71 (d, *J* = 4.2 Hz, 1H, *H*<sub>3</sub>), 8.43 (d, *J* = 8.0 Hz, 1H, *H*<sub>2</sub>), 8.24 (s, 1H, *H*<sub>12</sub>), 7.82 (t, *J* = 7.8 Hz, 1H, *H*<sub>4</sub>), 7.31 (t, *J* = 5.9 Hz, 1H, *H*<sub>3</sub>), 7.22 (s, 1H, *H*<sub>10</sub>), 4.84 (s, 2H, *H*<sub>14</sub>), 4.42 (s, 2H, *H*<sub>15</sub>), 4.07 (s, 5H, *H*<sub>16</sub>), 2.64 (s, 3H, *H*<sub>17</sub>). <sup>13</sup>C{<sup>1</sup>H} NMR (101 MHz, CDCl<sub>3</sub>) δ (ppm): 157.8 (*C*<sub>9</sub>), 156.7 (*C*<sub>7</sub>), 155.6 (*C*<sub>6</sub>), 149.7 (*C*<sub>11</sub>), 149.1 (*C*<sub>5</sub>), 136.8 (*C*<sub>4</sub>), 123.4 (*C*<sub>3</sub>), 121.4 (*C*<sub>2</sub>), 120.0 (*C*<sub>12</sub>), 115.2 (*C*<sub>10</sub>), 81.5 (*C*<sub>13</sub>), 70.0 (*C*<sub>15</sub>), 69.9 (*C*<sub>16</sub>), 67.2 (*C*<sub>14</sub>), 24.7 (*C*<sub>17</sub>). ATR-IR (ν cm<sup>-1</sup>): 2919, 1607, 1577, 1471, 1412, 1029, 787. UV-vis (λ nm / ε × 10<sup>6</sup> M<sup>-1</sup>cm<sup>-1</sup>): 237 (1.12), 285 (0.92), 363 (0.07), 455 (0.03). RP-HPLC: 2.696 min (methanol and 1% ammonium formate in water) 95 : 5 (v/v). HRMS (*m/z*): calcd for [M+H<sup>+</sup>] 355.0939, found for [M+H<sup>+</sup>] 355.0952.

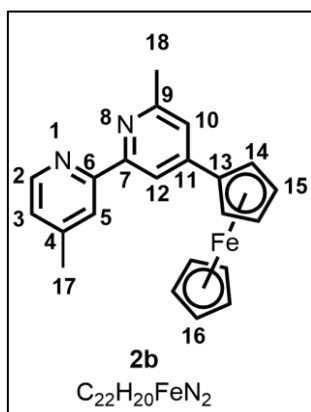

Yield: 23% (130 mg, 0.35 mmol).  $R_f$  0.63 (mobile phase: ethyl acetate: pet ether, 10% v/v). M.P.: 137 °C.  $^1\text{H}$  NMR (400 MHz, CDCl<sub>3</sub>)  $\delta$  (ppm): 8.57 (d,  $J = 5.1$  Hz, 1H,  $H_2$ ), 8.25 (s, 1H,  $H_5$ ), 8.23 (s, 1H,  $H_{12}$ ), 7.22 (s, 1H,  $H_{10}$ ), 7.13 (d,  $J = 5.2$  Hz, 1H,  $H_3$ ), 4.84 (s, 2H,  $H_{14}$ ), 4.41 (s, 2H,  $H_{15}$ ), 4.06 (s, 5H,  $H_{16}$ ), 2.64 (s, 3H,  $H_{18}$ ), 2.45 (s, 3H,  $H_{17}$ ).  $^{13}\text{C}\{^1\text{H}\}$  NMR (101 MHz, CDCl<sub>3</sub>)  $\delta$  (ppm): 157.6 ( $C_9$ ), 156.4 ( $C_7$ ), 155.7 ( $C_6$ ), 149.6 ( $C_{11}$ ), 148.9 ( $C_4$ ), 148.0 ( $C_5$ ), 124.4 ( $C_{12}$ ), 122.1 ( $C_2$ ), 119.9 ( $C_3$ ), 115.3 ( $C_{10}$ ), 81.5 ( $C_{13}$ ), 70.0 ( $C_{15}$ ), 69.9 ( $C_{16}$ ), 67.0 ( $C_{14}$ ), 24.7 ( $C_{18}$ ), 21.2 ( $C_{17}$ ). ATR-IR ( $\nu$  cm<sup>-1</sup>): 2924, 1619, 1577, 1454, 1102. UV-vis ( $\lambda$  nm /  $\epsilon \times 10^6$  M<sup>-1</sup>cm<sup>-1</sup>): 207 (1.26), 238 (1.08), 285 (0.79), 348 (0.16), 447 (0.03). RP-HPLC: 1.606 min (methanol and 1% ammonium formate in water) 95 : 5 (v/v). HRMS ( $m/z$ ): calcd for  $[\text{M}+\text{H}^+]$  369.1095, found for  $[\text{M}+\text{H}^+]$  369.1066.

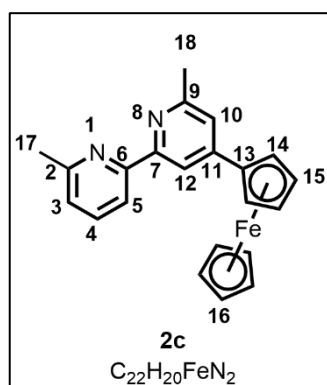

Yield: 69% (346 mg, 0.94 mmol).  $R_f$  0.63 (mobile phase: ethyl acetate: pet ether, 10% v/v). M.P.: 143 °C.  $^1\text{H}$  NMR (400 MHz, CDCl<sub>3</sub>)  $\delta$  (ppm): 8.22 (s, 1H,  $H_{12}$ ), 8.18 (d,  $J = 8.0$  Hz, 1H,  $H_3$ ), 7.69 (t,  $J = 7.8$  Hz, 1H,  $H_4$ ), 7.21 (s, 1H,  $H_{10}$ ), 7.17 (d,  $J = 7.8$  Hz, 1H,  $H_5$ ), 4.83 (s, 2H,  $H_{14}$ ), 4.42 (s, 2H,  $H_{15}$ ), 4.07 (s, 5H,  $H_{16}$ ), 2.67 (s, 3H,  $H_{18}$ ), 2.63 (s, 3H,  $H_{17}$ ).  $^{13}\text{C}\{^1\text{H}\}$  NMR (101 MHz, CDCl<sub>3</sub>)  $\delta$  (ppm): 157.9 ( $C_9$ ), 157.7 ( $C_6$ ), 156.1 ( $C_7$ ), 156.0 ( $C_2$ ), 149.5 ( $C_{11}$ ), 137.0 ( $C_3$ ), 123.0 ( $C_4$ ), 119.9 ( $C_5$ ), 118.4 ( $C_{10}$ ), 115.5 ( $C_{12}$ ), 81.8 ( $C_{14}$ ), 69.9 ( $C_{15}$  &  $C_{16}$ ), 67.1 ( $C_{14}$ ), 24.7 ( $C_{18}$  &  $C_{17}$ ). ATR-IR ( $\nu$  cm<sup>-1</sup>): 2919, 1611, 1577, 1547, 1407, 1025. 800. UV-vis ( $\lambda$  nm /  $\epsilon \times 10^6$  M<sup>-1</sup>cm<sup>-1</sup>): 239 (1.45), 288 (1.35), 361 (0.10), 453 (0.04). RP-HPLC: 3.624 min (methanol and 1% ammonium formate in water) 95 : 5 (v/v). HRMS ( $m/z$ ): calcd for  $[\text{M}+\text{H}^+]$  369.1095, found for  $[\text{M}+\text{H}^+]$  369.1109.

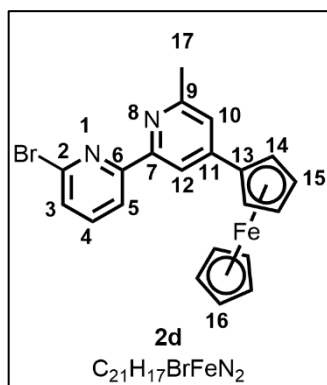

Yield: 44% (241 mg, 0.05 mmol).  $R_f$  0.64 (mobile phase: ethyl acetate: pet ether, 10% v/v). M.P.: 134 °C.  $^1\text{H}$  NMR (400 MHz, CDCl<sub>3</sub>)  $\delta$  (ppm): 8.41 (d,  $J = 7.2$  Hz, 1H,  $H_3$ ), 8.21 (s, 1H,  $H_{12}$ ), 7.66 (t,  $J = 7.8$  Hz, 1H,  $H_4$ ), 7.48 (d,  $J = 7.8$  Hz, 1H,  $H_5$ ), 7.23 (s, 1H,  $H_{10}$ ), 4.84 (s, 2H,  $H_{14}$ ), 4.43 (s, 2H,  $H_{15}$ ), 4.07 (s, 5H,  $H_{16}$ ), 2.62 (s, 3H,  $H_{17}$ ).  $^{13}\text{C}\{^1\text{H}\}$  NMR (101 MHz, CDCl<sub>3</sub>)  $\delta$  (ppm): 157.9 ( $C_9$ ), 157.8 ( $C_6$ ), 153.9 ( $C_7$ ), 149.9 ( $C_2$ ), 141.5 ( $C_{11}$ ), 139.1 ( $C_3$ ), 127.7 ( $C_4$ ),

120.5 ( $C_5$ ), 120.0 ( $C_{10}$ ), 115.5 ( $C_{12}$ ), 81.3 ( $C_{13}$ ), 70.1 ( $C_{15}$ ), 69.9 ( $C_{16}$ ), 67.1 ( $C_{14}$ ), 24.6 ( $C_{17}$ ). ATR-IR ( $\nu$   $\text{cm}^{-1}$ ): 2969, 1611, 1569, 1543, 1403, 1097, 808. UV-vis ( $\lambda$  nm /  $\epsilon \times 10^6 \text{ M}^{-1}\text{cm}^{-1}$ ): 240 (0.63), 292 (0.54), 359 (0.03), 456 (0.02). RP-HPLC: 8.228 min (methanol and 20% methanol in water) 95 : 5 ( $v/v$ ). HRMS ( $m/z$ ): calcd for  $[\text{M}+\text{H}^+]$  433.0044, found for  $[\text{M}+\text{H}^+]$  433.0015.

#### Synthesis of by-product **2d'**:

In a 15 mL Schlenk flask with a stirbar, 2-acetyl-6-bromopyridine (3.00 equiv.) was dissolved in 6 mL of EtOH, followed by the addition of KOH (6.00 equiv.). After 10 mins of stirring, ferrocenecarboxaldehyde (1.00 equiv.) was added, and the solution was stirred at 40 °C for 2 h. After 2 h, TLC of the reaction mixture showed the product and a faint spot for ferrocene carboxaldehyde (5%  $v/v$  ethyl acetate: pet ether as the mobile phase). The solvent was removed under vacuum, and the resulting solid was loaded onto a silica column. The unreacted ferrocenecarboxaldehyde was eluted with a 2%  $v/v$  ethyl acetate: pet ether mixture, and the expected product was also collected in the same eluent. The TLC of this spot showed two closely spaced spots with a 5%  $v/v$  ethyl acetate: pet ether mobile phase, which were inseparable. The  $^1\text{H}$  and  $^{13}\text{C}$  NMR spectra showed the presence of diastereoisomers.

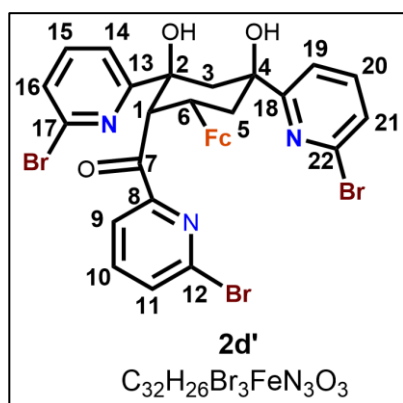

Yield: 43% (153 mg, 0.19 mmol).  $^1\text{H}$  NMR (400 MHz,  $\text{CDCl}_3$ )  $\delta$  7.90 (d,  $J = 7.6$  Hz, 1H), 7.64 (d,  $J = 1.3$  Hz, 3H), 7.53 (d,  $J = 7.7$  Hz, 1H), 7.43 (d,  $J = 6.2$  Hz, 4H), 7.13 (d,  $J = 7.7$  Hz, 1H), 5.97 (s, 1H), 5.92 (d,  $J = 1.6$  Hz, 1H), 5.04 (d,  $J = 11.7$  Hz, 1H), 4.25 (s, 1H), 4.22 (s, 1H), 4.16 (s, 2H), 4.05 (s, 5H), 2.61 (t,  $J = 8.3$  Hz, 2H), 2.42 (d,  $J = 13.5$  Hz, 1H), 2.08 (q,  $J = 5.4$  Hz, 1H).  $^{13}\text{C}\{^1\text{H}\}$  NMR (101 MHz,  $\text{CDCl}_3$ )  $\delta$  197.3, 196.6, 142.2, 141.7, 140.4, 139.6, 138.8, 136.0, 132.2, 131.9,

131.4, 131.1, 130.6, 130.3, 130.2, 129.9, 129.6, 128.6, 127.8, 126.8, 125.8, 123.2, 123.0, 122.6, 122.3, 96.9, 84.9, 69.9, 69.8, 69.0, 26.6. ATR-IR ( $\nu$   $\text{cm}^{-1}$ ): 3406, 1677, 1547, 1399. UV-vis ( $\lambda$  nm /  $\epsilon \times 10^3 \text{ M}^{-1}\text{cm}^{-1}$ ): 240 (6.1), 333 (5.3), 460 (0.97). RP-HPLC (purity): 8.218 min (80%) (mobile phase: methanol and 1% ammonium formate in water) 95:5 ( $v/v$ ). HRMS ( $m/z$ ): calcd for  $[\text{M}-\text{Br}+\text{Na}^+]$  740.9635, found for  $[\text{M}-\text{Br}+\text{Na}^+]$  740.9421; calcd for  $[\text{M}-\text{Br}^+]$  717.9737, found for  $[\text{M}-\text{Br}^+]$  717.9544.

### Synthesis of **2e**<sup>11,12</sup>:

In a 50 mL round bottom flask with a stirbar, acetophenone (1.00 equiv.) was dissolved in 4 mL of EtOH with stirring, followed by adding KOH (3.33 equiv.). When the color changed from colorless to slight orange, ferrocenecarboxyaldehyde (1.00 equiv.) was added and stirred at 45 °C for two hours, with a precipitate formation. After two hours of stirring, the reaction mixture was cooled down, and 10 mL of water was added; the precipitate was filtered and washed with water (3 × 10 mL). The red precipitate was then air-dried for 24 hours and then vacuum-dried (0.096 mbar at rt) for two hours to remove the remaining water. TLC showed a single spot. In another 50 mL round-bottom flask with a stirbar, the red precipitate obtained (1.00 equiv.) was added, followed by 4 mL of EtOH. Under stirring, 2-acetylpyridine (1.00 equiv.) and KOH (3.33 equiv.) were added and stirred for two hours at 45 °C. After two hours, the reaction mixture was cooled down, and the precipitate obtained was filtered and washed with water (3 × 10 mL). The solid obtained was then air-dried for 24 hours. The orange solid obtained was then kept in the oven at 85 °C for 4 hours to remove the water completely. The solid obtained was further used without purification. The orange precipitate was added to a 100 mL round-bottom flask with a stirbar, followed by 4 mL of EtOH. Ammonia solution (60% in water) (50 equiv.) was added and refluxed for 12 hours. After 12 hours, the solution was cooled and kept at -4 °C overnight for precipitation. After 16 hours, the solution showed no precipitation. TLC showed a new spot, along with unreacted orange precipitate. The ethanol was removed by high vacuum (0.120 mbar at 30 °C) and then purified by silica column chromatography, with 0–10% v/v ethyl acetate and pet ether mixture as eluent.

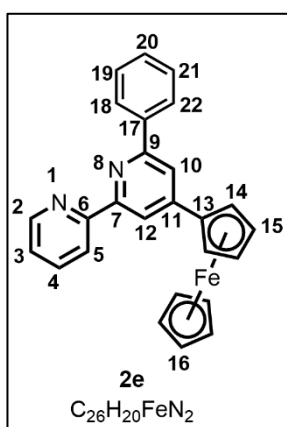

Yield: 34% (340 mg, 0.84 mmol). <sup>1</sup>H NMR (400 MHz, CDCl<sub>3</sub>) δ (ppm): 8.74 (d, *J* = 4.3 Hz, 1H), 8.67 (d, *J* = 7.9 Hz, 1H), 8.45 (s, 1H), 8.19 (d, *J* = 7.6 Hz, 2H), 7.86 (t, *J* = 7.6 Hz, 1H), 7.82 (s, 1H), 7.54 (t, *J* = 7.4 Hz, 2H), 7.46 (t, *J* = 7.0 Hz, 1H), 7.34 (t, *J* = 6.0 Hz, 1H), 4.93 (s, 2H), 4.46 (s, 2H), 4.10 (s, 5H). <sup>13</sup>C{<sup>1</sup>H} NMR (101 MHz, CDCl<sub>3</sub>) δ (ppm): 156.6, 155.8, 150.5, 149.1, 139.8, 136.9, 129.0, 128.8, 127.1, 123.8, 121.6, 117.3, 116.3, 81.8, 70.2, 70.1, 67.3. ATR-IR (ν cm<sup>-1</sup>): 3098, 2922, 1602, 1550. UV-vis (λ nm / ε × 10<sup>3</sup> M<sup>-1</sup>cm<sup>-1</sup>): 248 (15.1), 284 (10.7), 366 (0.97), 454 (0.47). RP-HPLC (purity): 8.062 min (98%) (mobile phase: acetonitrile and 1% ammonium formate in water) 95:5 (v/v)). HRMS (*m/z*): calcd for [M+H]<sup>+</sup> 417.1054, found for [M+H]<sup>+</sup> 417.1069.

### Synthesis of **3a–e**:

The Re(I) complexes were synthesized using a modified procedure for the [Re(I)(bpy)(CO)<sub>3</sub>Cl] complex<sup>13</sup>. A Schlenk flask with a magnetic stirbar was charged with the ligand (1.00 equiv.) in 3 mL of dry toluene under Ar atmosphere. Re(CO)<sub>5</sub>Br (1.00 equiv.) was added to this solution, and the reaction mixture was refluxed at 110 °C, where the color changed from brown to red. After the color change was observed, the mixture was stirred for another four hours and then cooled to room temperature, leading to a dark-colored precipitate. The solution was kept at –4 °C overnight to obtain more precipitate. The dark red solution was decanted, and the precipitate was washed with toluene (2 × 5 mL) and cold diethyl ether (2 × 5 mL). The compound was dried under vacuum at 0.30 mbar for 20 min.

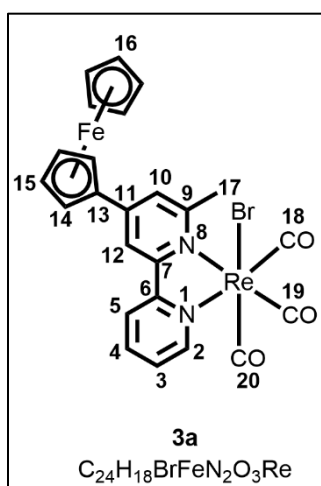

Yield: 69% (59.0 mg, 0.084 mmol). <sup>1</sup>H NMR (400 MHz, CDCl<sub>3</sub>) δ (ppm): 9.12 (d, *J* = 5.4 Hz, 1H), 8.19 (d, *J* = 8.2 Hz, 1H), 8.02 (t, *J* = 7.9 Hz, 1H), 7.90 (s, 1H), 7.48 (t, *J* = 6.4 Hz, 1H), 7.42 (s, 1H), 4.81 (d, *J* = 9.4 Hz, 2H), 4.59 (s, 2H), 4.12 (s, 5H), 3.02 (s, 3H). <sup>1</sup>H NMR (400 MHz, DMSO-*D*<sub>6</sub>) δ 9.06 (d, *J* = 5.4 Hz, 1H, *H*<sub>5</sub>), 8.95 (d, *J* = 8.5 Hz, 1H, *H*<sub>2</sub>), 8.51 (s, 1H, *H*<sub>12</sub>), 8.33 (t, *J* = 8.3 Hz, 1H, *H*<sub>3</sub>), 7.90 (s, 1H, *H*<sub>10</sub>), 7.75 (t, *J* = 6.5 Hz, 1H, *H*<sub>4</sub>), 5.31 (s, 2H, *H*<sub>14</sub>), 4.67 (s, 2H, *H*<sub>15</sub>), 4.12 (s, 5H, *H*<sub>16</sub>), 2.91 (s, 3H, *H*<sub>17</sub>). <sup>13</sup>C {<sup>1</sup>H} NMR (101 MHz, DMSO-*D*<sub>6</sub>) δ 197.8 (CO), 197.2 (CO), 189.3 (CO), 160.6 (*C*<sub>9</sub>), 156.6 (*C*<sub>6</sub>), 155.9 (*C*<sub>7</sub>), 153.8 (*C*<sub>11</sub>), 152.6 (*C*<sub>5</sub>), 140.1 (*C*<sub>8</sub>), 127.4 (*C*<sub>3</sub>), 124.7 (*C*<sub>4</sub>), 122.9 (*C*<sub>10</sub>), 117.9 (*C*<sub>12</sub>), 78.0 (*C*<sub>13</sub>), 71.7 (*C*<sub>15</sub>), 70.2 (*C*<sub>16</sub>), 68.2 (*C*<sub>14</sub>), 30.1 (*C*<sub>17</sub>). ATR-IR (ν cm<sup>-1</sup>): 2009, 1896, 1874 (CO peaks). UV-vis (λ nm / ε × 10<sup>6</sup> M<sup>-1</sup>cm<sup>-1</sup>): 248 (0.49), 309 (0.44), 363 (0.11), 505 (0.05). RP-HPLC: 3.168 min (methanol and 1% ammonium formate in water) 95 : 5 (v/v). HRMS (*m/z*): calcd for [M]<sup>+</sup> 703.9408, found [M]<sup>+</sup> 703.9379. Anal calcd (in %) for C<sub>24</sub>H<sub>18</sub>BrFeN<sub>2</sub>O<sub>3</sub>Re: C, 40.91; H, 2.58; N, 3.98. Found: C, 41.70; H, 2.66; N, 4.11.

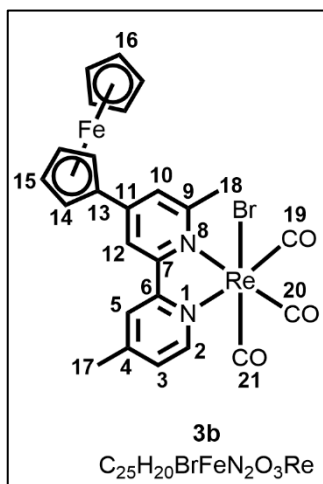

Yield: 75% (65 mg, 0.091 mmol). <sup>1</sup>H NMR (400 MHz, DMSO-D<sub>6</sub>) δ (ppm): 8.88 (d, *J* = 5.5 Hz, 1H, *H*<sub>2</sub>), 8.81 (s, 1H, *H*<sub>5</sub>), 8.48 (s, 1H, *H*<sub>12</sub>), 7.90 (s, 1H, *H*<sub>10</sub>), 7.58 (d, *J* = 5.9 Hz, 1H, *H*<sub>3</sub>), 5.31 (s, 2H, *H*<sub>14</sub>), 4.68 (s, 2H, *H*<sub>15</sub>), 4.13 (s, 5H, *H*<sub>16</sub>), 2.90 (s, 3H, *H*<sub>18</sub>), 2.60 (s, 3H, *H*<sub>17</sub>). <sup>13</sup>C {<sup>1</sup>H} NMR (101 MHz, DMSO-D<sub>6</sub>) δ (ppm): 197.7 (CO), 197.4 (CO), 189.3 (CO), 160.5 (*C*<sub>9</sub>), 156.1 (*C*<sub>6</sub>), 156.0 (*C*<sub>7</sub>), 153.6 (*C*<sub>4</sub>), 152.1 (*C*<sub>11</sub>), 151.9 (*C*<sub>2</sub>), 128.0 (*C*<sub>3</sub>), 125.1 (*C*<sub>5</sub>), 122.7 (*C*<sub>10</sub>), 117.6 (*C*<sub>12</sub>), 78.0 (*C*<sub>13</sub>), 71.6 (*C*<sub>15</sub>), 70.1 (*C*<sub>16</sub>), 68.0 (*C*<sub>14</sub>), 30.5 (*C*<sub>18</sub>), 20.9 (*C*<sub>17</sub>). ATR-IR (ν cm<sup>-1</sup>): 2008, 1884 (CO peaks). UV-vis (λ nm

/ ε x 10<sup>6</sup> M<sup>-1</sup>cm<sup>-1</sup>): 206 (1.24), 249 (0.61), 306 (0.44), 324 (0.34), 505 (0.05). RP-HPLC: 2.092 min (methanol and 1% ammonium formate in water) 95 : 5 (v/v). HRMS (*m/z*): calcd for [M]<sup>+</sup> 717.9564, found [M]<sup>+</sup> 717.9556. Anal calcd (in %) for C<sub>25</sub>H<sub>20</sub>BrFeN<sub>2</sub>O<sub>3</sub>Re: C, 41.78; H, 2.81; N, 3.90. Found: C, 40.46; H, 2.79; N, 3.79.

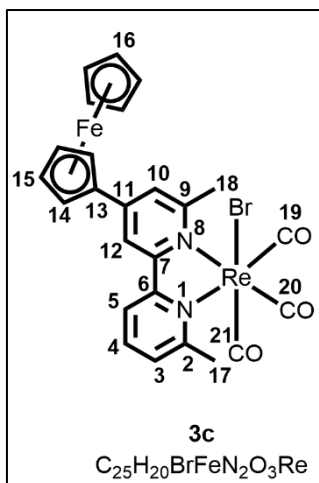

Yield: 50% (43 mg, 0.061 mmol). <sup>1</sup>H NMR (400 MHz, DMSO-D<sub>6</sub>) δ (ppm): 8.77 (d, *J* = 7.8 Hz, 1H, *H*<sub>3</sub>), 8.45 (s, 1H, *H*<sub>12</sub>), 8.20 (t, *J* = 7.9 Hz, 1H, *H*<sub>4</sub>), 7.84 (s, 1H, *H*<sub>10</sub>), 7.75 (d, *J* = 7.8 Hz, 1H, *H*<sub>5</sub>), 5.31 (s, 2H, *H*<sub>14</sub>), 4.66 (s, 2H, *H*<sub>15</sub>), 4.11 (s, 5H, *H*<sub>16</sub>), 3.00 (s, 3H, *H*<sub>17</sub>), 2.95 (s, 3H, *H*<sub>18</sub>). <sup>13</sup>C {<sup>1</sup>H} NMR (101 MHz, DMSO-D<sub>6</sub>) δ (ppm): 197.1 (CO), 197.1 (CO), 189.0 (CO), 161.3 (*C*<sub>9</sub>), 160.5 (*C*<sub>2</sub>), 157.8 (*C*<sub>6</sub>), 157.2 (*C*<sub>7</sub>), 153.6 (*C*<sub>11</sub>), 139.9 (*C*<sub>4</sub>), 126.8 (*C*<sub>5</sub>), 122.3 (*C*<sub>10</sub>), 122.0 (*C*<sub>3</sub>), 117.9 (*C*<sub>12</sub>), 78.0 (*C*<sub>13</sub>), 71.5 (*C*<sub>15</sub>), 70.0 (*C*<sub>16</sub>), 68.0 (*C*<sub>14</sub>), 29.6 (*C*<sub>17</sub>), 29.3 (*C*<sub>18</sub>). ATR-IR (ν cm<sup>-1</sup>): 2007, 1872 (CO peaks).

UV-vis (λ nm / ε x 10<sup>6</sup> M<sup>-1</sup>cm<sup>-1</sup>): 252 (0.86), 305 (0.73), 332 (0.54), 369 (0.16), 503 (0.08). RP-HPLC: 2.040 min (methanol and 1% ammonium formate in water) 95 : 5 (v/v). HRMS (*m/z*): calcd for [M]<sup>+</sup> 717.9564, found [M]<sup>+</sup> 717.9532. Anal calcd (in %) C<sub>25</sub>H<sub>20</sub>BrFeN<sub>2</sub>O<sub>3</sub>Re: C, 41.78; H, 2.81; N, 3.90. Found: C, 40.73; H, 3.13; N, 4.04.

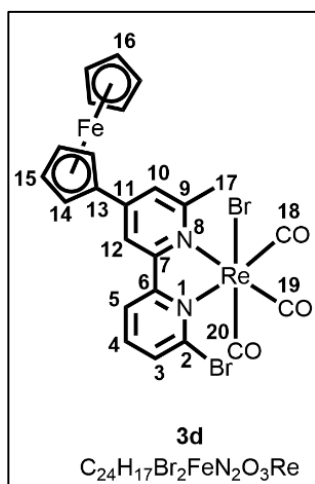

Yield: 72% (68 mg, 0.087 mmol). <sup>1</sup>H NMR (400 MHz, DMSO-D<sub>6</sub>) δ (ppm): 8.96 (d, *J* = 7.8 Hz, 1H, *H*<sub>3</sub>), 8.46 (s, 1H, *H*<sub>12</sub>), 8.21 (t, *J* = 8.0 Hz, 1H, *H*<sub>4</sub>), 8.14 (d, *J* = 7.5 Hz, 1H, *H*<sub>5</sub>), 7.85 (s, 1H, *H*<sub>10</sub>), 7.25 (t, *J* = 7.5 Hz, 1H) (Toluene), 7.16 (d, *J* = 7.4 Hz, 1H) (Toluene), 5.32 (s, 2H, *H*<sub>14</sub>), 4.67 (s, 2H, *H*<sub>15</sub>), 4.12 (s, 5H, *H*<sub>16</sub>), 2.94 (s, 3H, *H*<sub>17</sub>), 2.30 (s, 1.5H) (Toluene). <sup>13</sup>C {<sup>1</sup>H} NMR (101 MHz, DMSO-D<sub>6</sub>) δ (ppm): 197.4 (CO), 197.3 (CO), 189.8 (CO), 160.7 (*C*<sub>9</sub>), 159.8 (*C*<sub>6</sub>), 157.0 (*C*<sub>5</sub>), 153.7 (*C*<sub>2</sub>), 145.7 (*C*<sub>7</sub>), 141.8 (*C*<sub>5</sub>), 137.3 (Toluene), 131.0 (Toluene), 128.9 (Toluene), 128.2 (Toluene), 125.3 (*C*<sub>4</sub>), 123.5 (*C*<sub>3</sub>), 122.4 (*C*<sub>10</sub>), 118.8 (*C*<sub>12</sub>), 77.9 (*C*<sub>13</sub>), 71.7 (*C*<sub>15</sub>), 70.1 (*C*<sub>16</sub>), 68.1 (*C*<sub>14</sub>), 29.3 (*C*<sub>17</sub>), 21.0 (Toluene). ATR-IR (ν cm<sup>-1</sup>): 2006, 1883 (CO peaks). UV-vis (λ nm / ε x 10<sup>6</sup> M<sup>-1</sup>cm<sup>-1</sup>): 247 (0.44), 317 (0.39), 339 (0.30), 371 (0.96), 513 (0.05). RP-HPLC: 2.137 min (methanol and 1% ammonium formate in water) 95 : 5 (v/v). HRMS (*m/z*): calcd for [M]<sup>+</sup> 781.8513, found [M]<sup>+</sup> 781.8480. Anal calcd (in %) for C<sub>24</sub>H<sub>17</sub>Br<sub>2</sub>FeN<sub>2</sub>O<sub>3</sub>Re·(0.5)CH<sub>3</sub>C<sub>6</sub>H<sub>5</sub>: C, 39.86; H, 2.56; N, 3.38. Found: C, 40.25; H, 2.69; N, 3.31.

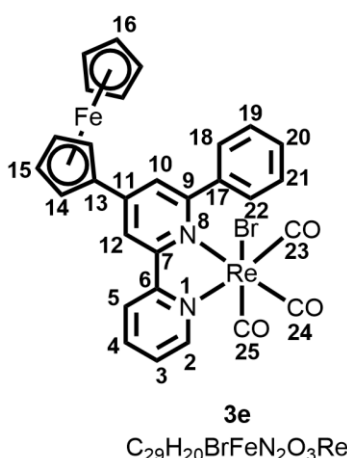

Yield: 78% (37.0 mg, 0.050 mmol). <sup>1</sup>H NMR (400 MHz, CDCl<sub>3</sub>) δ (ppm): 9.11 (d, *J* = 5.0 Hz, 1H), 8.29 (d, *J* = 8.2 Hz, 1H), 8.07 (s, 1H), 8.03 (t, *J* = 4.6 Hz, 1H), 7.66 (s, 2H), 7.59 (s, 3H), 7.52 (d, *J* = 1.6 Hz, 1H), 7.48 (t, *J* = 6.5 Hz, 1H), 4.85 (d, *J* = 24.7 Hz, 2H), 4.61 (s, 2H), 4.13 (s, 5H). <sup>1</sup>H NMR (400 MHz, DMSO-D<sub>6</sub>) δ 9.04 (d, *J* = 5.3 Hz, 1H, *H*<sub>1</sub>), 8.97 (d, *J* = 8.2 Hz, 1H, *H*<sub>4</sub>), 8.65 (s, 1H, *H*<sub>7</sub>), 8.35 (t, *J* = 7.9 Hz, 1H, *H*<sub>3</sub>), 7.80 (s, 1H, *H*<sub>9</sub>), 7.74 (t, *J* = 6.5 Hz, 1H, *H*<sub>2</sub>), 7.62 (bs, 2H, *H*<sub>18</sub> & *H*<sub>22</sub>), 7.58 (bs, 3H, *H*<sub>19</sub>, *H*<sub>20</sub> & *H*<sub>21</sub>), 5.40 (d, *J* = 14.6 Hz, 2H, *H*<sub>14</sub>), 4.67 (s, 2H, *H*<sub>15</sub>), 4.13 (s, 5H, *H*<sub>16</sub>). <sup>13</sup>C {<sup>1</sup>H} NMR (101 MHz, DMSO-D<sub>6</sub>) δ 197.6 (CO), 193.5 (CO), 191.1 (CO), 162.6 (*C*<sub>6</sub>), 157.2 (*C*<sub>5</sub>), 156.4 (*C*<sub>10</sub>), 154.3 (*C*<sub>1</sub>), 152.9 (*C*<sub>4</sub>), 142.0 (*C*<sub>3</sub>), 139.9 (*C*<sub>2</sub>), 129.9 (*C*<sub>7</sub>), 129.3 (*C*<sub>8</sub> & *C*<sub>11</sub>), 127.3 (*C*<sub>9</sub>), 125.3 (*C*<sub>12</sub> & *C*<sub>16</sub>), 122.9 (*C*<sub>13</sub> & *C*<sub>15</sub>), 118.9 (*C*<sub>14</sub>), 77.8 (*C*<sub>17</sub>), 72.1 (*C*<sub>19</sub>), 70.5 (*C*<sub>20</sub>), 68.6 (*C*<sub>18</sub>), 68.2 (*C*<sub>18</sub>). ATR-IR (ν cm<sup>-1</sup>): 2020, 1919, 1892 (CO peaks). UV-vis (λ nm / ε x 10<sup>3</sup> M<sup>-1</sup>cm<sup>-1</sup>): 254 (4.89), 312 (4.49), 366 (1.11), 512 (0.57). RP-HPLC (purity): 4.183 min (97%) (mobile phase: acetonitrile and 1% ammonium formate in water) 95:5 (v/v). HRMS (*m/z*): calcd for [M+Na]<sup>+</sup> 788.9480, found [M+Na]<sup>+</sup> 788.8940; calcd for [M-Br]<sup>+</sup>

687.0400, found  $[M-Br]^+$  686.9947. Anal calcd (in %) for  $C_{29}H_{20}BrFeN_2O_3Re$ : C, 45.43; H, 2.61; N, 3.65. Found: C, 45.47; H, 2.68; N, 3.86.

Characterisation of chalcones:

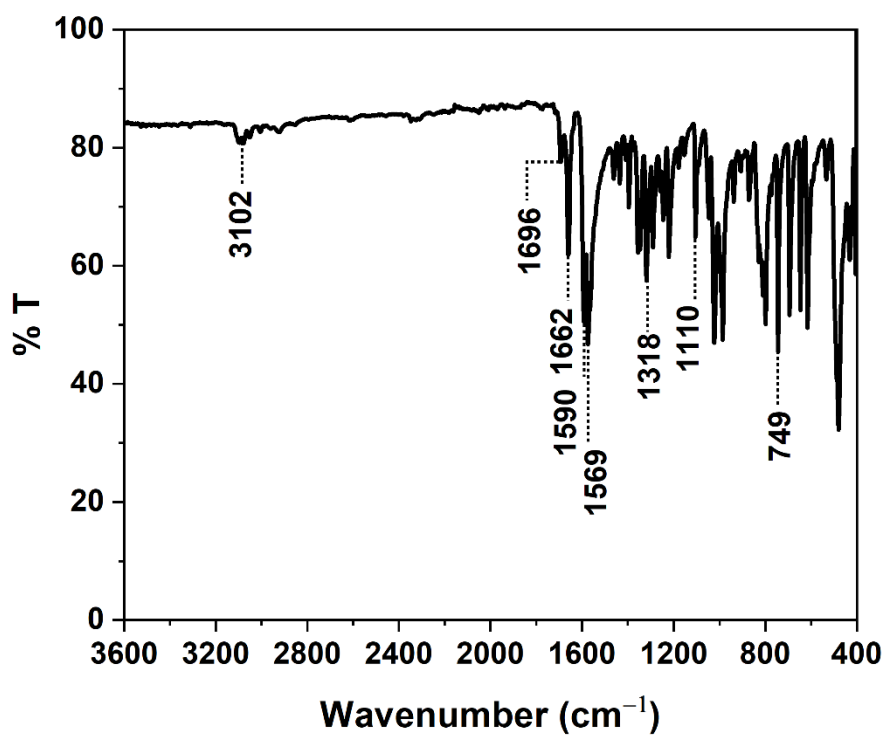

**Figure S1a:** ATR-IR spectrum of 1a.

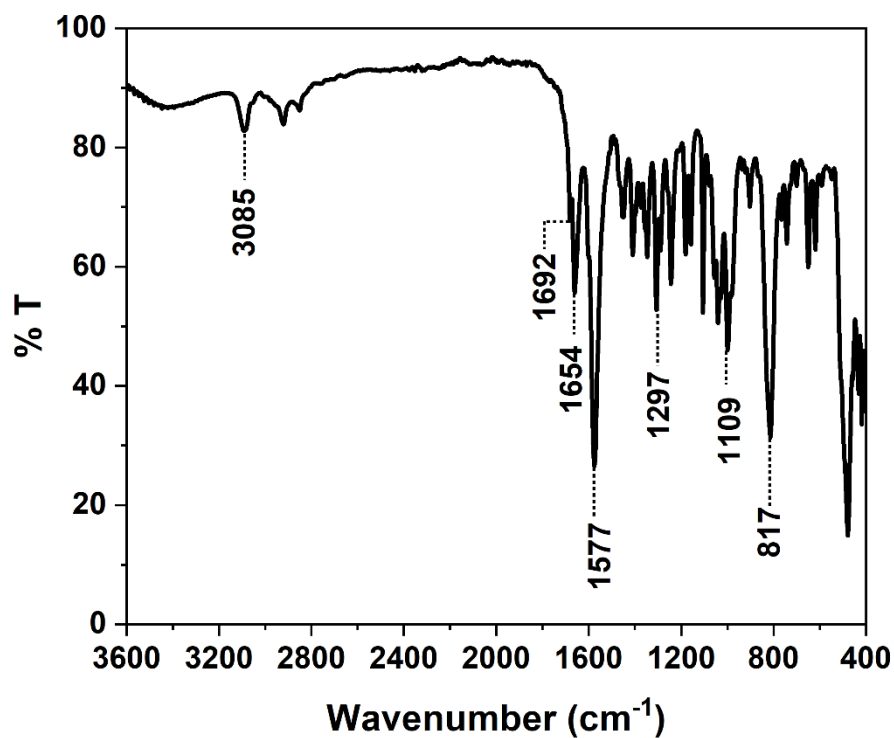

**Figure S1b:** ATR-IR spectrum of 1b.

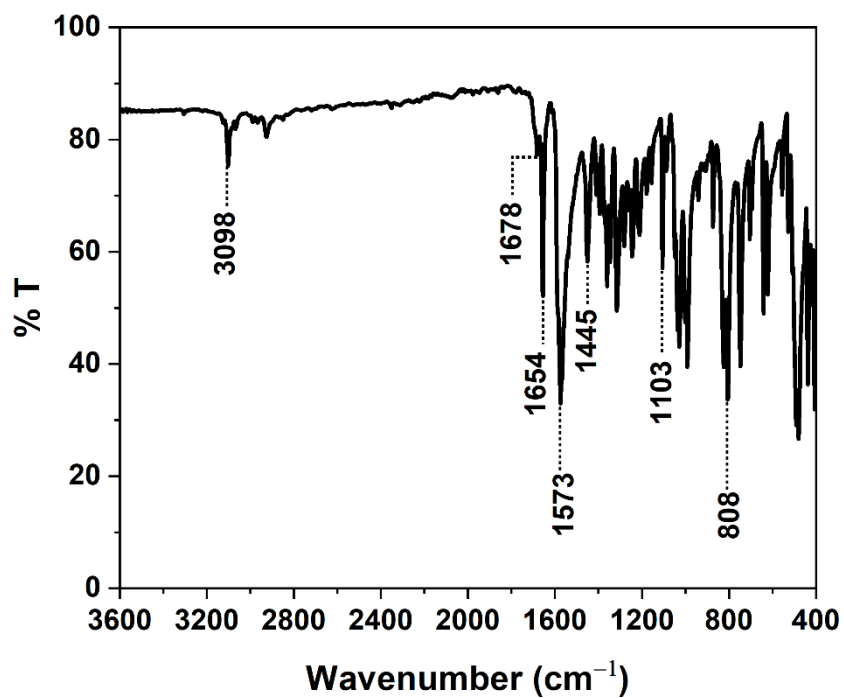

Figure S1c: ATR-IR spectrum of 1c.

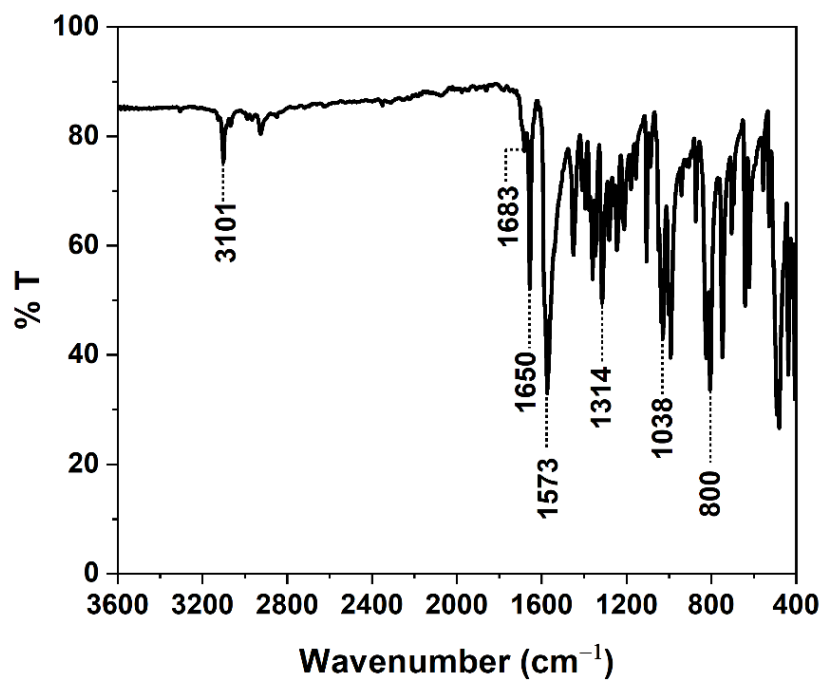

Figure S1d: ATR-IR spectrum of 1d.

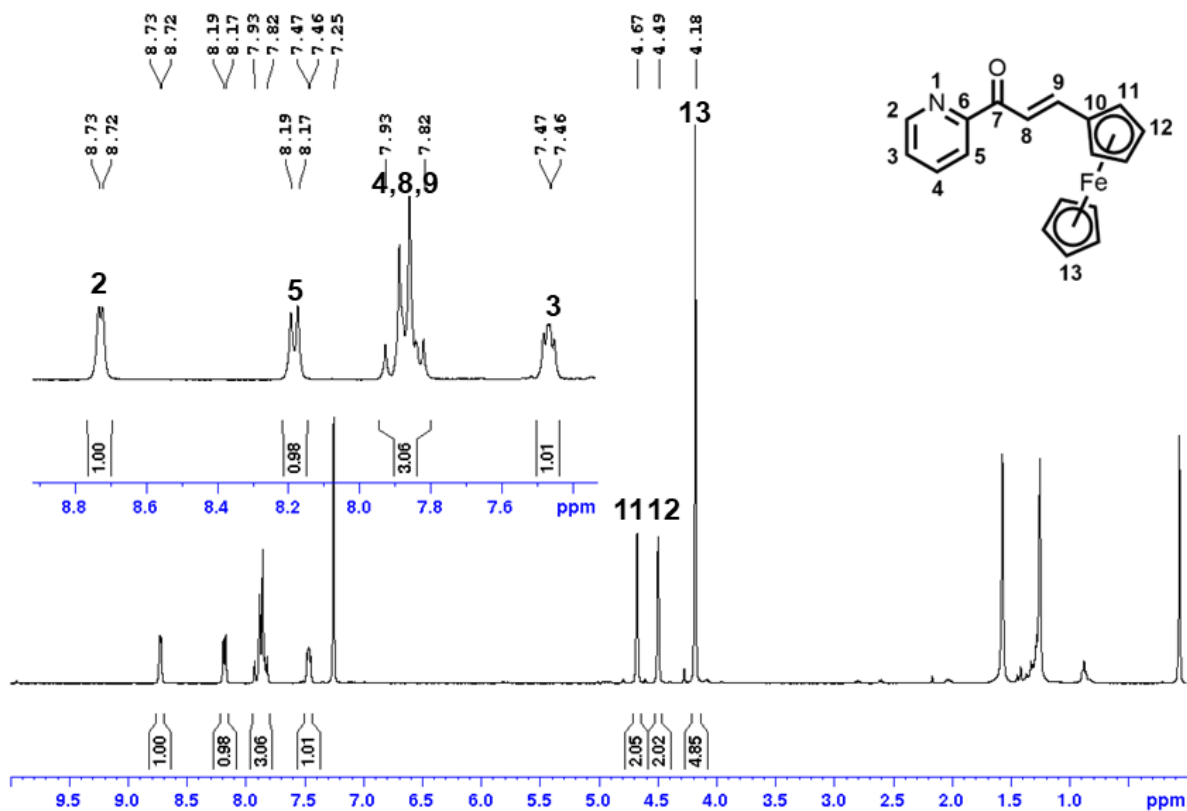

Figure S1e:  $^1\text{H}$  NMR spectrum (400 MHz,  $\text{CDCl}_3$ ) of **1a**.

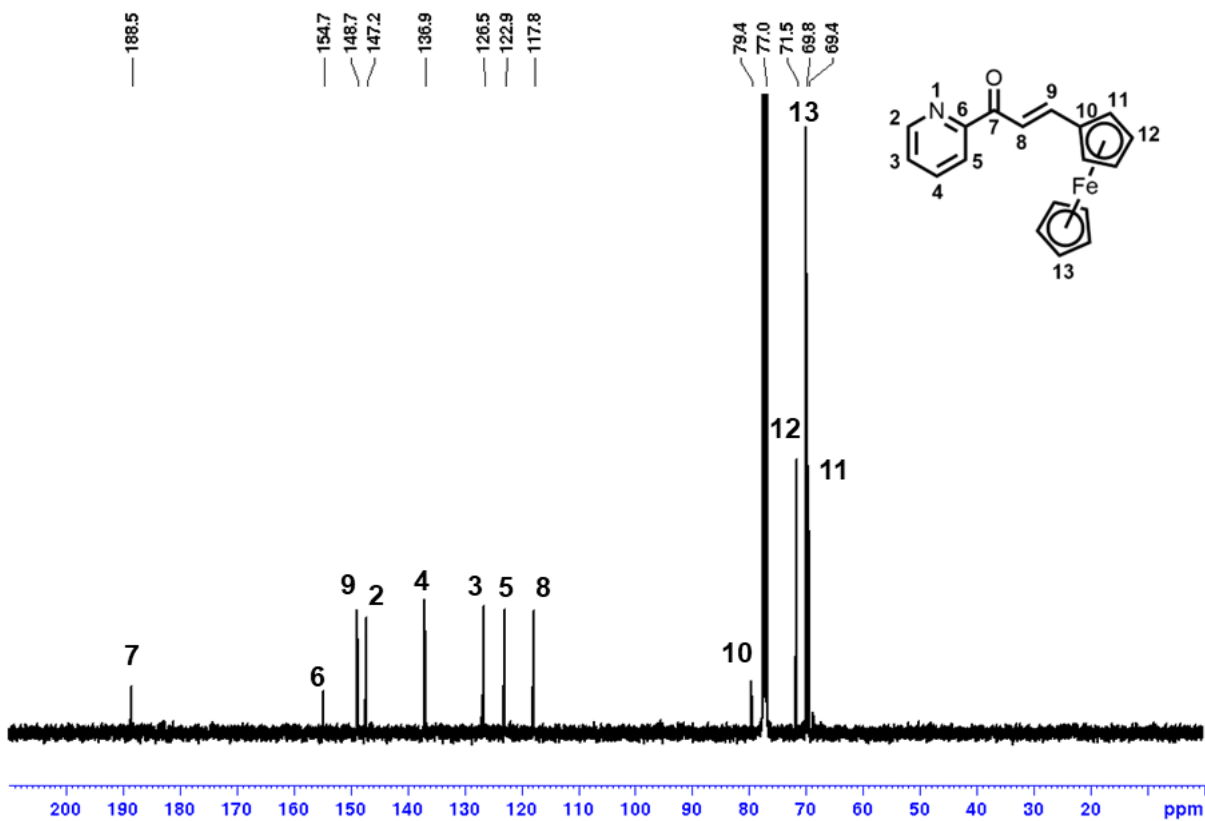

Figure S1f:  $^{13}\text{C}\{^1\text{H}\}$  NMR spectrum (101 MHz,  $\text{CDCl}_3$ ) of **1a**.

Sample Name Fc1a Position p1b8 Instrument Name QTOF User Name LCMSQTOF-PC\admin  
 Inj Vol 5 InjPosition InjPosition SampleType Sample IRM Calibration Status Success  
 Data Filename Fc1a-rep.d ACQ Method direct mass\_+veESI.m Comment Acquired Time 12/11/2023 5:29:59 PM

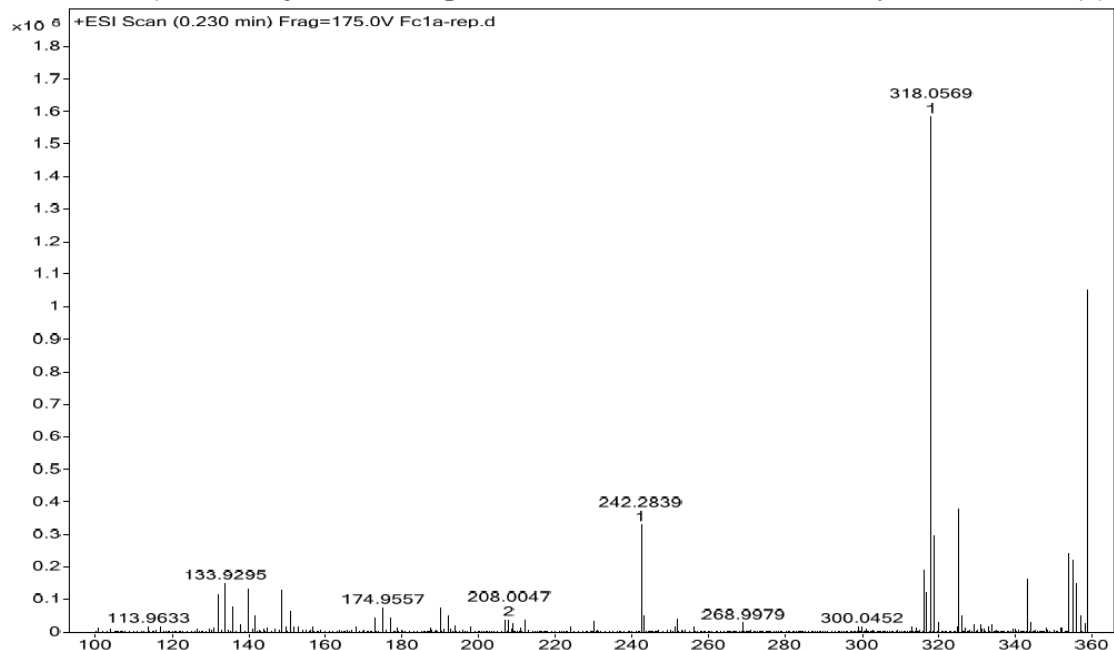

**Figure S1g:** HRMS spectrum of **1a** (M: C<sub>18</sub>H<sub>15</sub>FeNO); *m/z* calcd. for [M+H<sup>+</sup>] 318.0622, *m/z* found for [M+H<sup>+</sup>] 318.0569.

## SHIMADZU LabSolutions Analysis Report

### <Sample Information>

Sample Name : Fc1a  
 Sample ID : Fc1a  
 Data Filename : Fc1a\_017.lcd  
 Method Filename : B\_95\_D\_5\_10min\_0\_2mLmin.lcm  
 Batch Filename : 081024.lcb  
 Vial # : 1-78  
 Injection Volume : 2 uL  
 Date Acquired : 10/8/2024 4:05:22 PM  
 Date Processed : 10/8/2024 4:15:26 PM  
 Sample Type : Unknown  
 Acquired by : System Administrator  
 Processed by : System Administrator

mAU

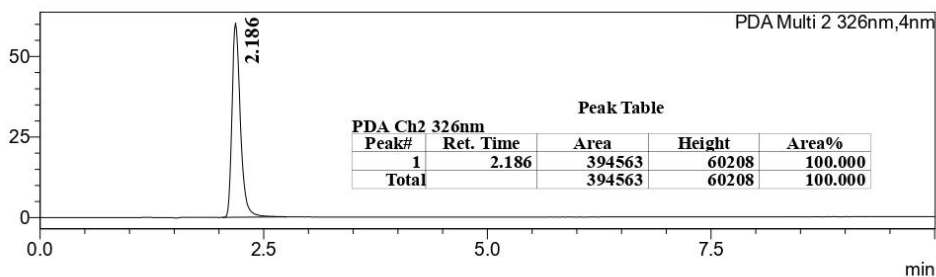

UV Spectrum

Retention Time : 2.186 min

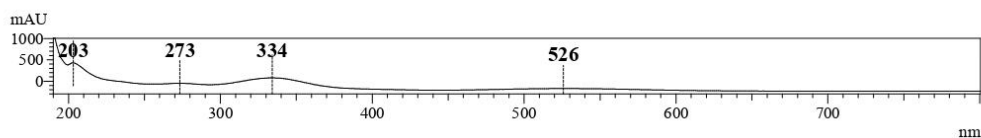

**Figure S1h:** RP-HPLC-MS **1a**; HPLC purity 100%; UV-vis spectrum shown at Rt = 2.186 min.

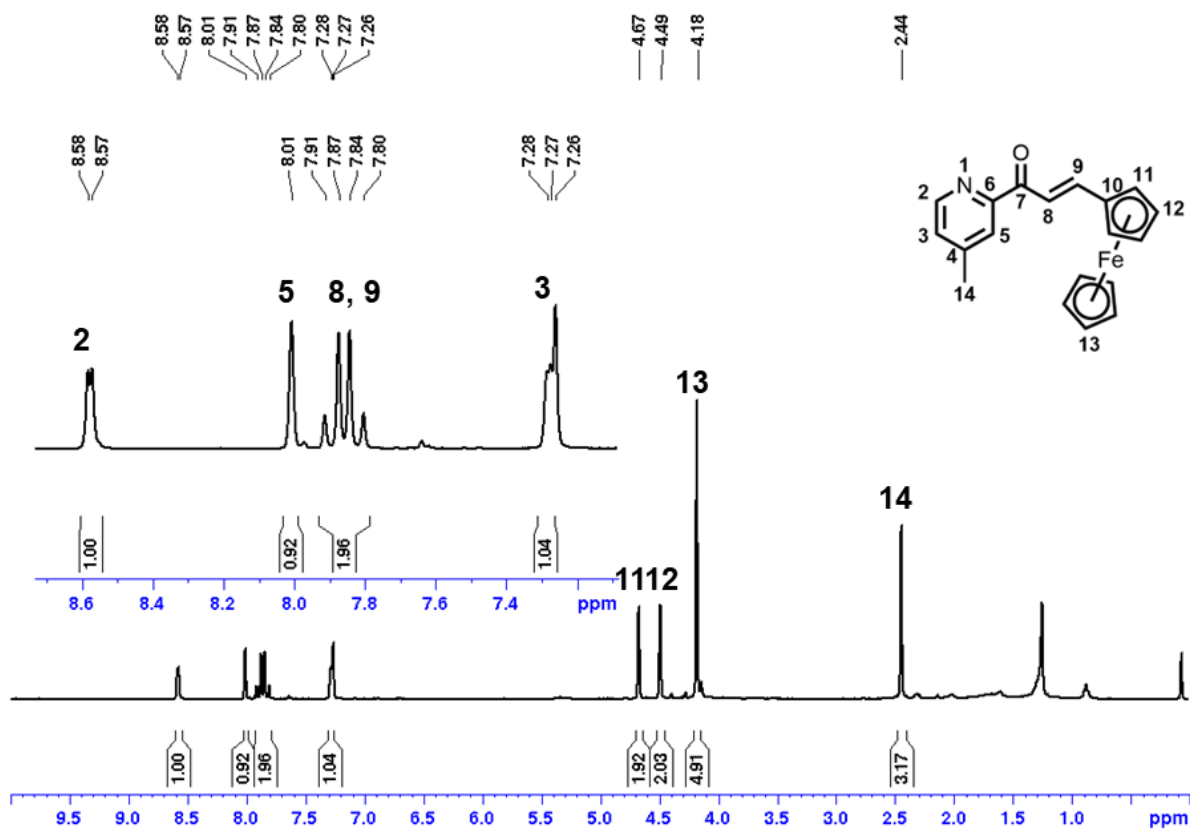

**Figure S1i:**  $^1\text{H}$  NMR spectrum (400 MHz,  $\text{CDCl}_3$ ) of **1b**.

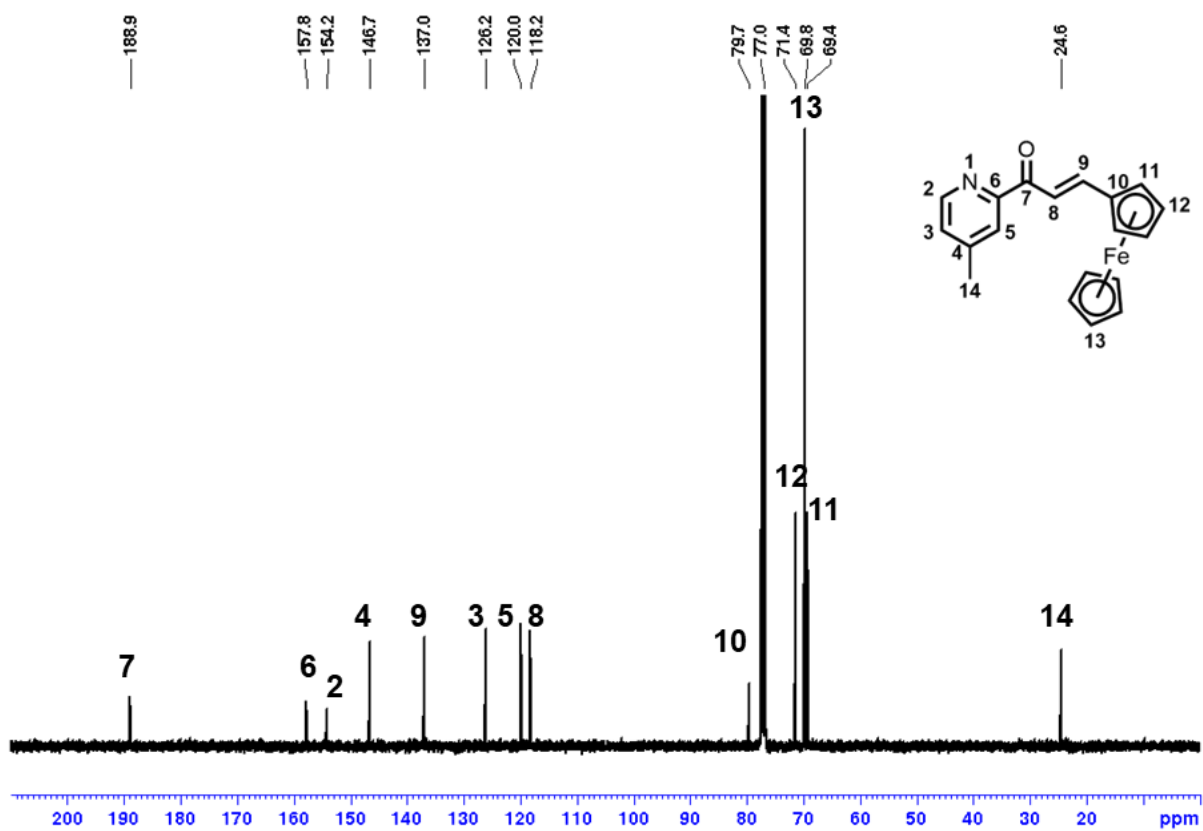

**Figure S1j:**  $^{13}\text{C}\{^1\text{H}\}$  NMR spectrum (101 MHz,  $\text{CDCl}_3$ ) of **1b**.

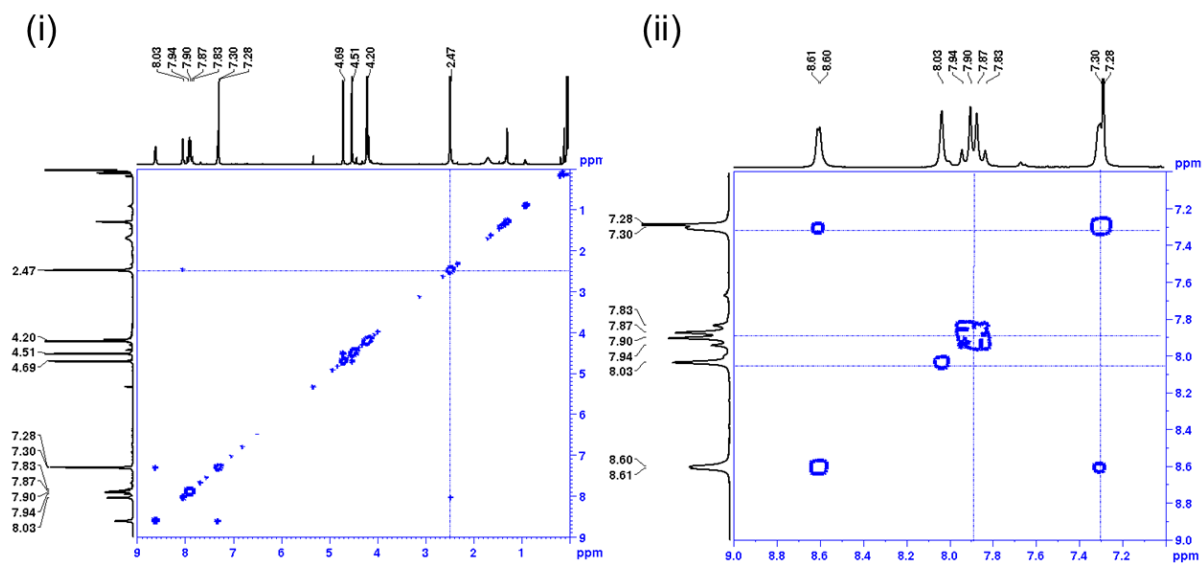

**Figure S1k:** (i)  $^1\text{H}$ - $^1\text{H}$  correlation spectrum of **1b** (0–9 ppm) shows the correlation between methyl and aromatic protons; (ii) Section of  $^1\text{H}$ - $^1\text{H}$  correlation spectrum (7–9 ppm) shows the correlations amongst the aromatic protons.

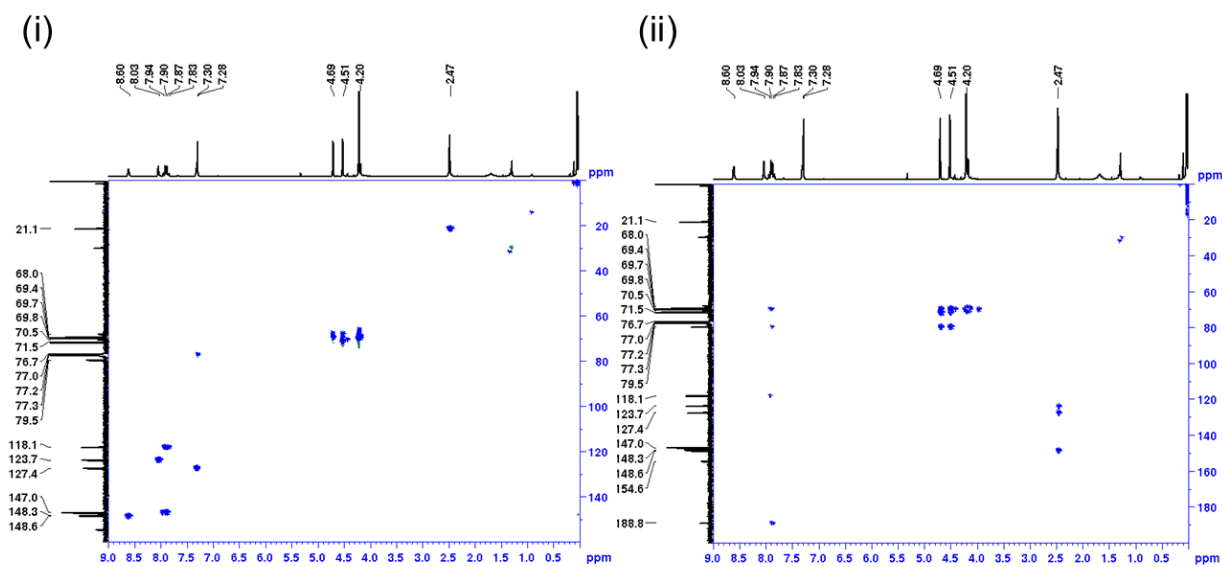

**Figure S1l:** (i) HSQC and (ii) HMBC spectra of **1b**.

Sample Name Fc1b Position p1b3 Instrument Name QTOF User Name LCMSQTOF-PC\admin  
 Inj Vol 1 InjPosition InjPosition SampleType Sample IRM Calibration Status Success  
 Data Filename Fc1b.d ACQ Method direct mass\_+veESI.m Comment Acquired Time 12/11/2023 5:12:00 PM

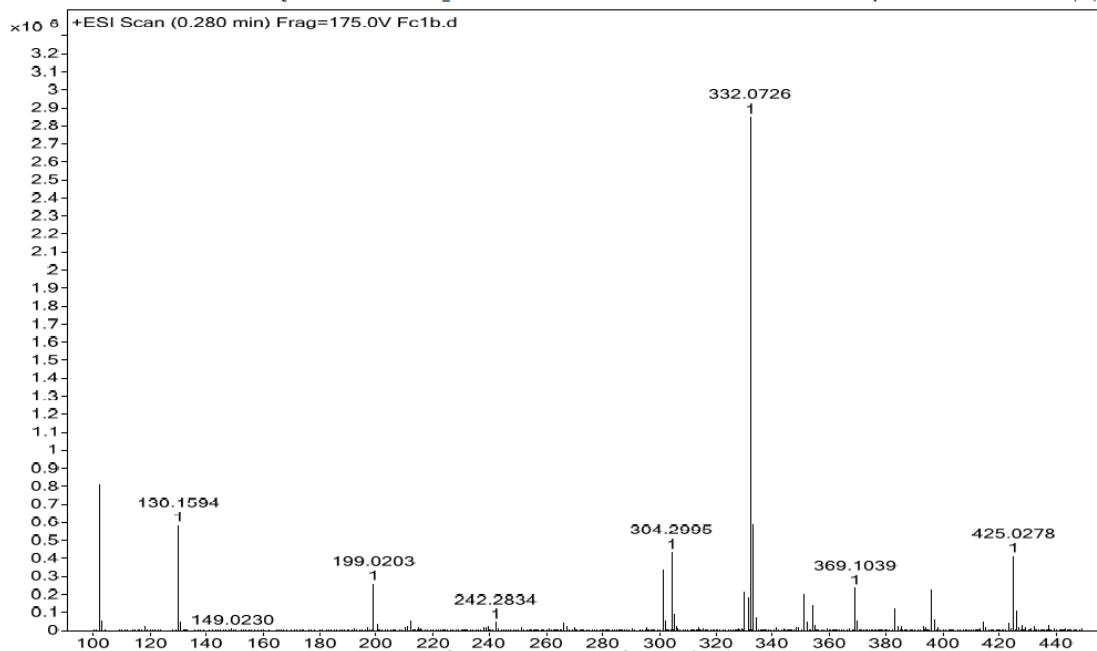

**Figure S1m:** HRMS spectrum of **1b** (M: C<sub>19</sub>H<sub>17</sub>FeNO); *m/z* calcd. for [M+H<sup>+</sup>] 332.0779, *m/z* found for [M+H<sup>+</sup>] 332.0726.

**SHIMADZU LabSolutions Analysis Report**

**<Sample Information>**

Sample Name : Fc1b  
 Sample ID : Fc1b  
 Data Filename : Fc1b\_002.lcd  
 Method Filename : B\_95\_D\_5\_10min\_0\_2mLmin.lcm  
 Batch Filename : 081024.lcb  
 Vial # : 1-81  
 Injection Volume : 2 uL  
 Date Acquired : 10/9/2024 10:08:34 AM  
 Date Processed : 10/9/2024 10:18:39 AM  
 Sample Type : Unknown  
 Acquired by : System Administrator  
 Processed by : System Administrator

mAU

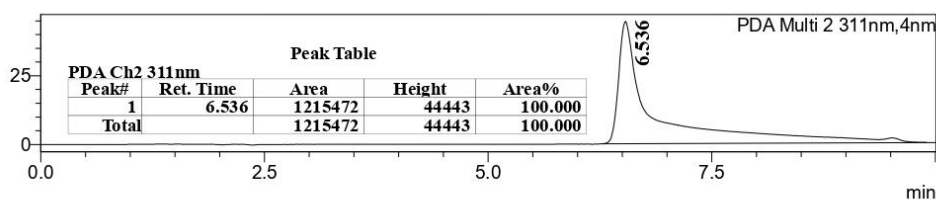

Retention Time : 6.536 min

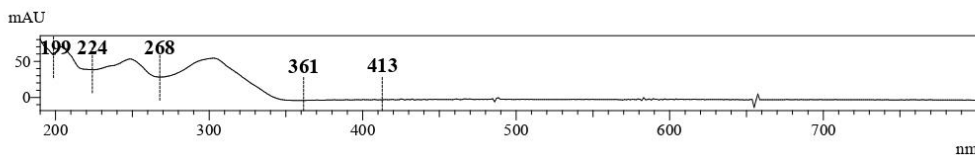

**Figure S1n:** RP-HPLC-MS **1b**; HPLC purity 100%; UV-vis spectrum shown at Rt = 6.536 min.

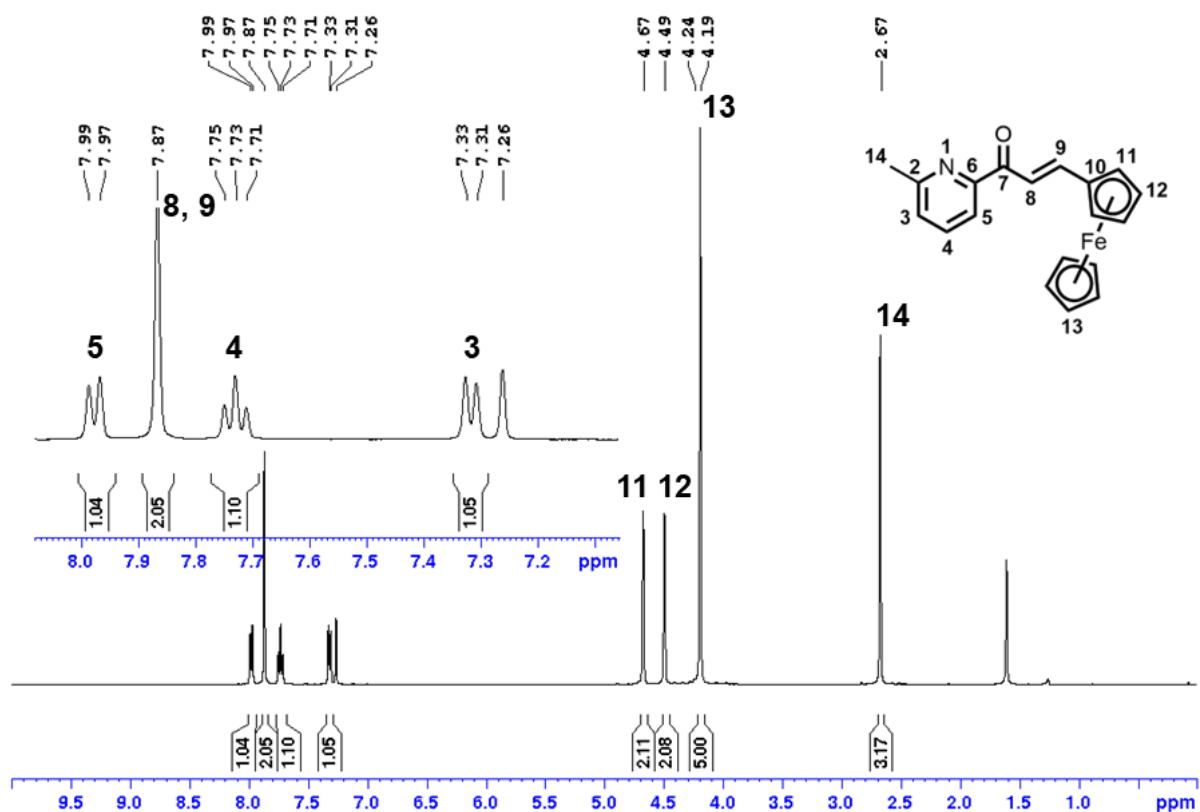

**Figure S1o:**  $^1\text{H}$  NMR spectrum (400 MHz,  $\text{CDCl}_3$ ) of **1c**.

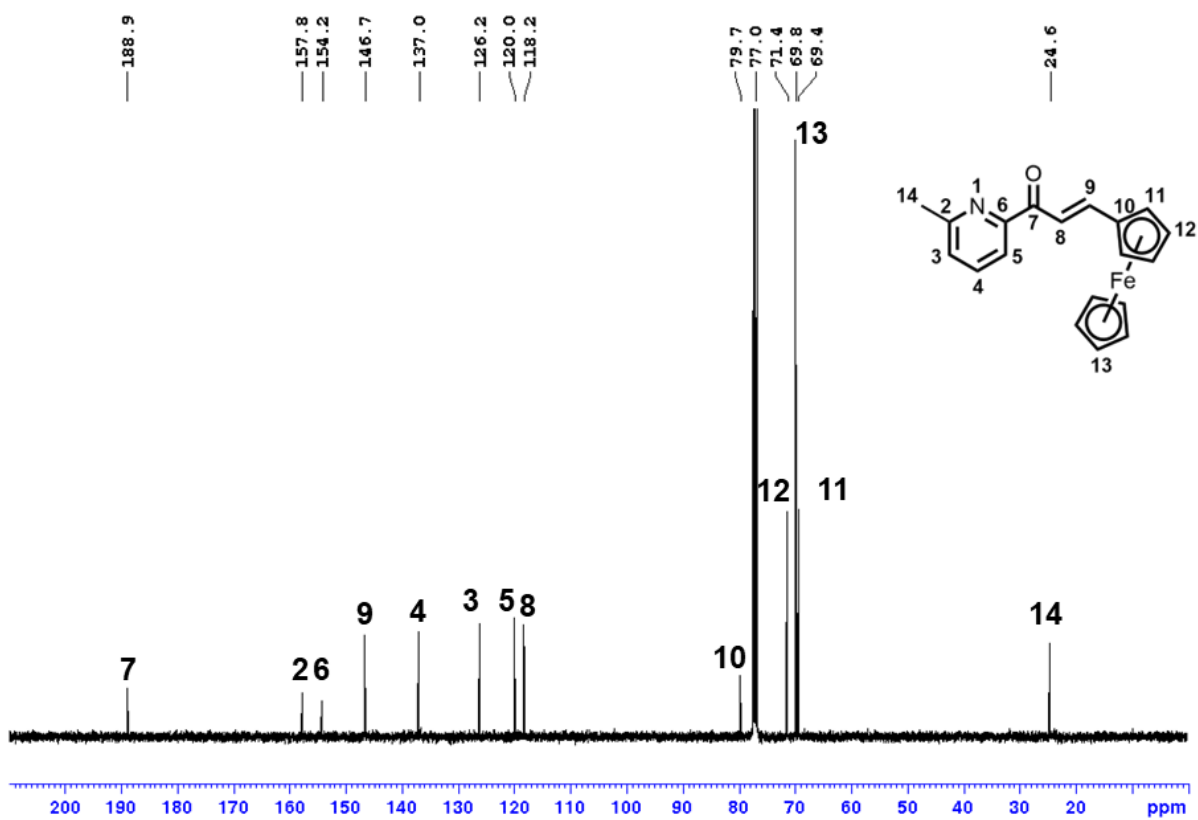

**Figure S1p:**  $^{13}\text{C}$  NMR spectrum (101 MHz,  $\text{CDCl}_3$ ) of **1c**.

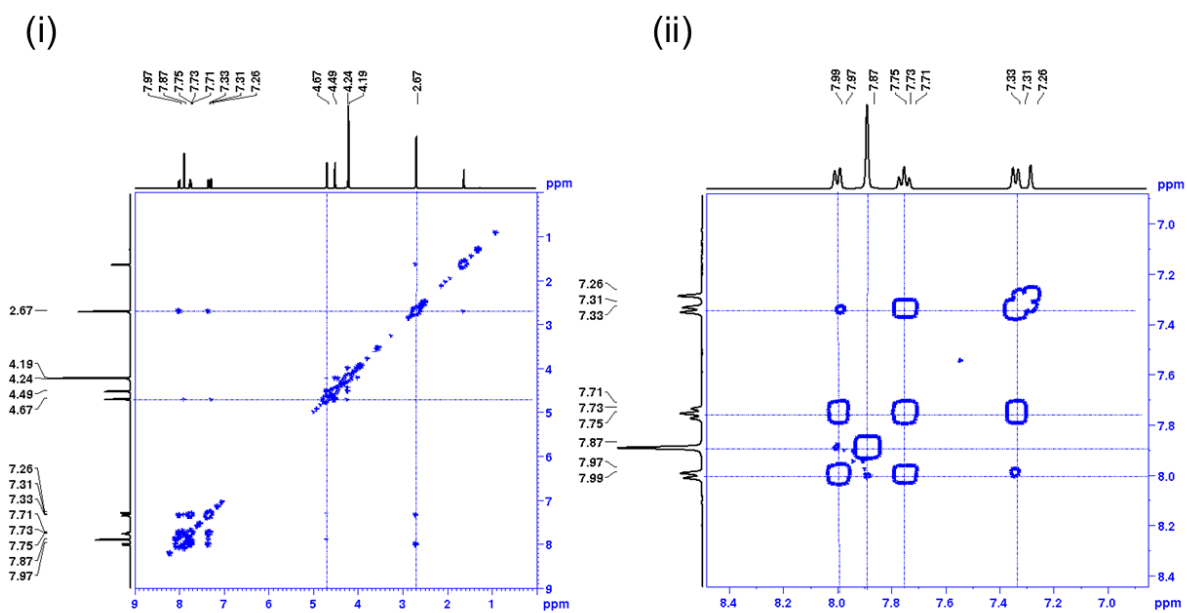

**Figure S1q:** (i)  $^1\text{H}$ - $^1\text{H}$  correlation spectrum of **1c** (0–9 ppm) shows the correlation between methyl-aromatic protons, and ferrocene protons with aromatic protons; (ii) Section of  $^1\text{H}$ - $^1\text{H}$  correlation spectrum (7–9 ppm) shows the correlations amongst the aromatic protons.

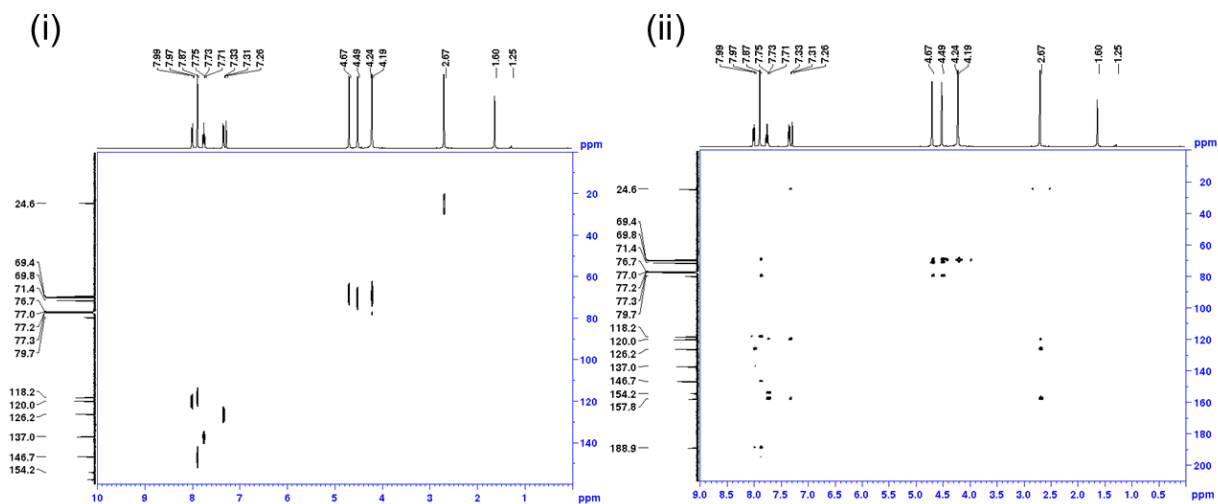

**Figure S1r:** (i) HSQC and (ii) HMBC spectra of **1c**.

Sample Name Fc1c Position p1b4 Instrument Name QTOF User Name LCMSTOF-PC\admin  
 Inj Vol 1 InjPosition InjPosition SampleType Sample IRM Calibration Status Success  
 Data Filename Fc1c.d ACQ Method direct mass\_+veESI.m Comment Acquired Time 12/11/2023 5:13:47 PM

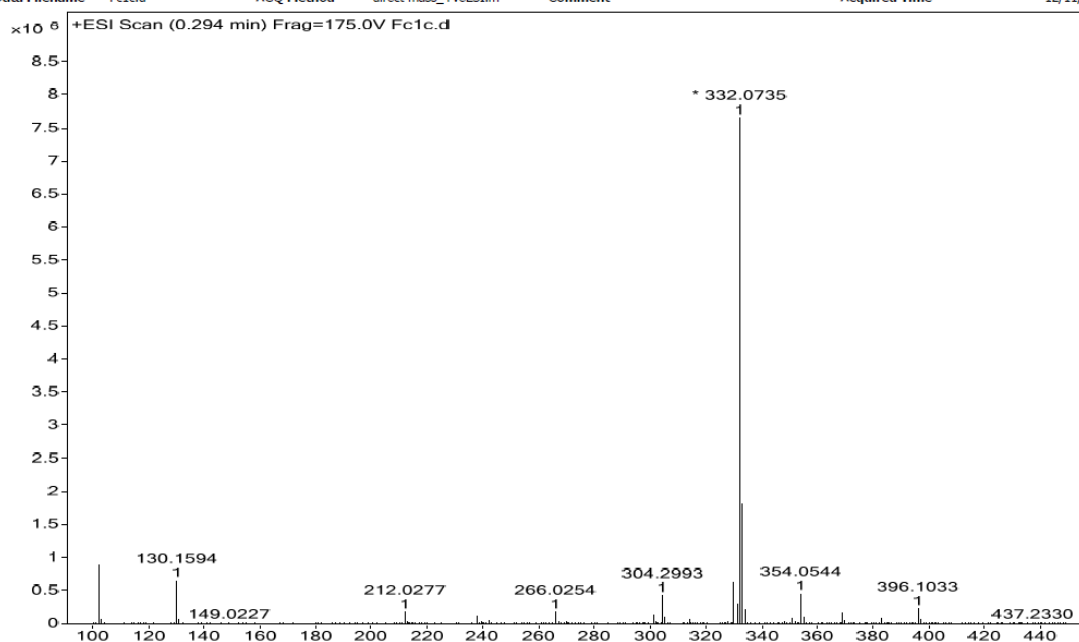

**Figure S1s:** HRMS spectrum of **1c** (M: C<sub>19</sub>H<sub>17</sub>FeNO); *m/z* calcd for [M+H<sup>+</sup>] 332.0779, *m/z* found for [M+H<sup>+</sup>] 332.0735.

## SHIMADZU LabSolutions Analysis Report

### <Sample Information>

Sample Name : Fc1c  
 Sample ID : Fc1c  
 Data Filename : Fc1c\_023.lcd  
 Method Filename : B\_95\_D\_5\_10min\_0\_2mLmin.lcm  
 Batch Filename : 081024.lcb  
 Vial # : 1-80  
 Injection Volume : 2 uL  
 Date Acquired : 10/9/2024 8:55:50 AM  
 Date Processed : 10/9/2024 9:05:56 AM  
 Sample Type : Unknown  
 Acquired by : System Administrator  
 Processed by : System Administrator

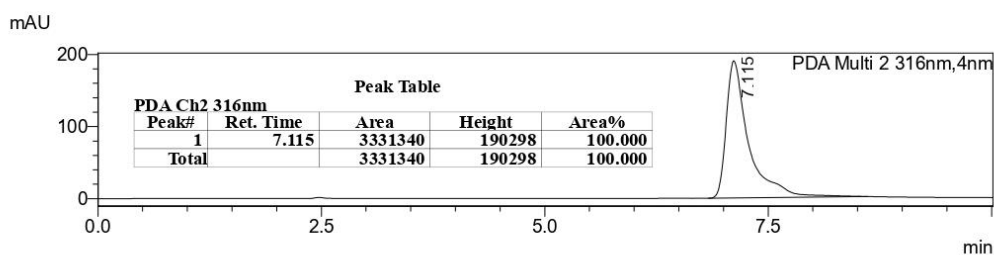

Retention Time : 7.115 min UV Spectrum

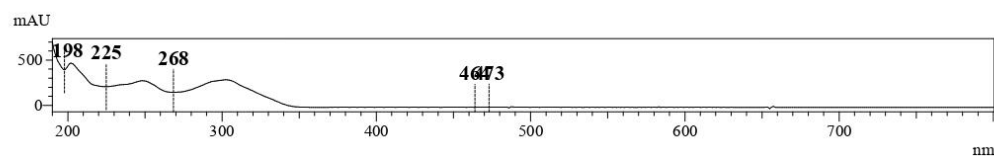

**Figure S1t:** RP-HPLC-MS **1c**; HPLC purity 100%; UV-vis spectrum shown at Rt = 7.115 min.

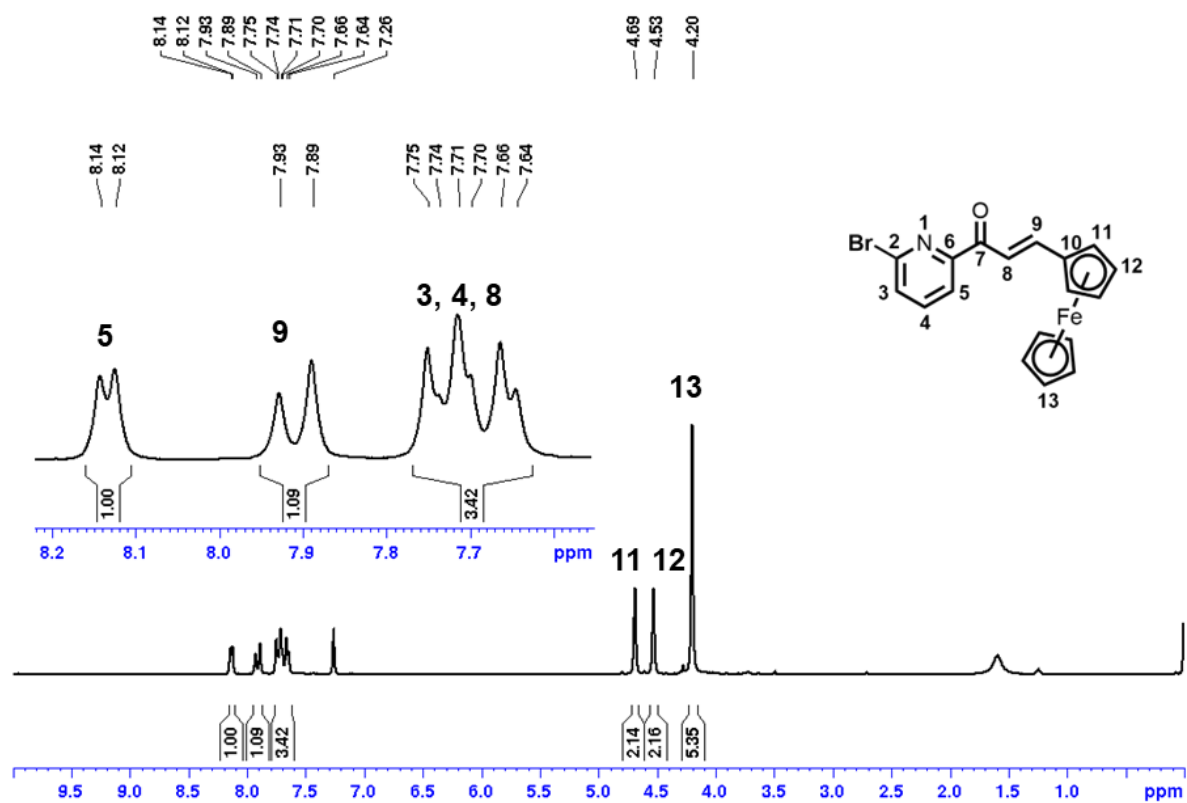

Figure S1u:  $^1\text{H}$  NMR spectrum (400 MHz,  $\text{CDCl}_3$ ) of **1d**.

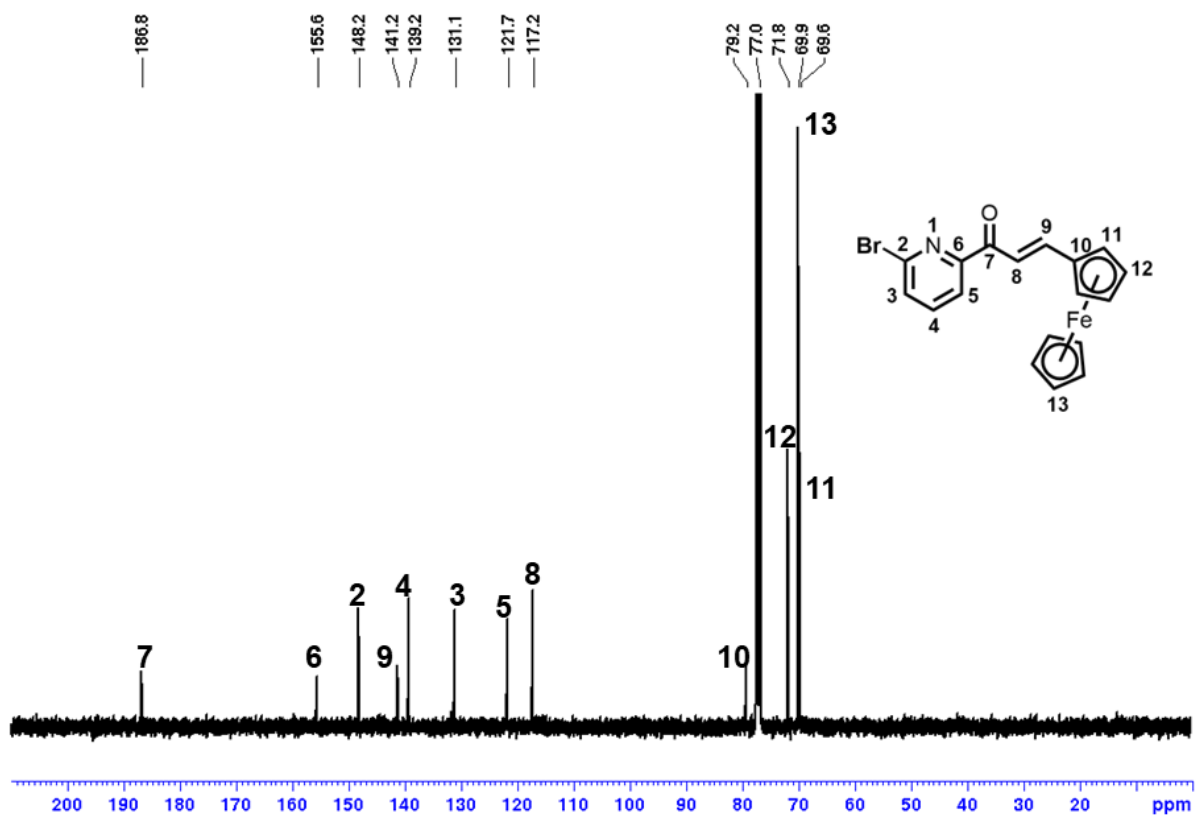

Figure S1v:  $^{13}\text{C}\{^1\text{H}\}$  NMR spectrum (101 MHz,  $\text{CDCl}_3$ ) of **1d**.

|               |        |             |                      |                 |        |                        |                       |
|---------------|--------|-------------|----------------------|-----------------|--------|------------------------|-----------------------|
| Sample Name   | Fc1d   | Position    | p1b2                 | Instrument Name | QTOF   | User Name              | LCMSQTOF-PC\admin     |
| Inj Vol       | 3      | InjPosition |                      | SampleType      | Sample | IRM Calibration Status | Success               |
| Data Filename | Fc1d.d | ACQ Method  | direct.mass_+veESI.m | Comment         |        | Acquired Time          | 12/11/2023 5:10:00 PM |

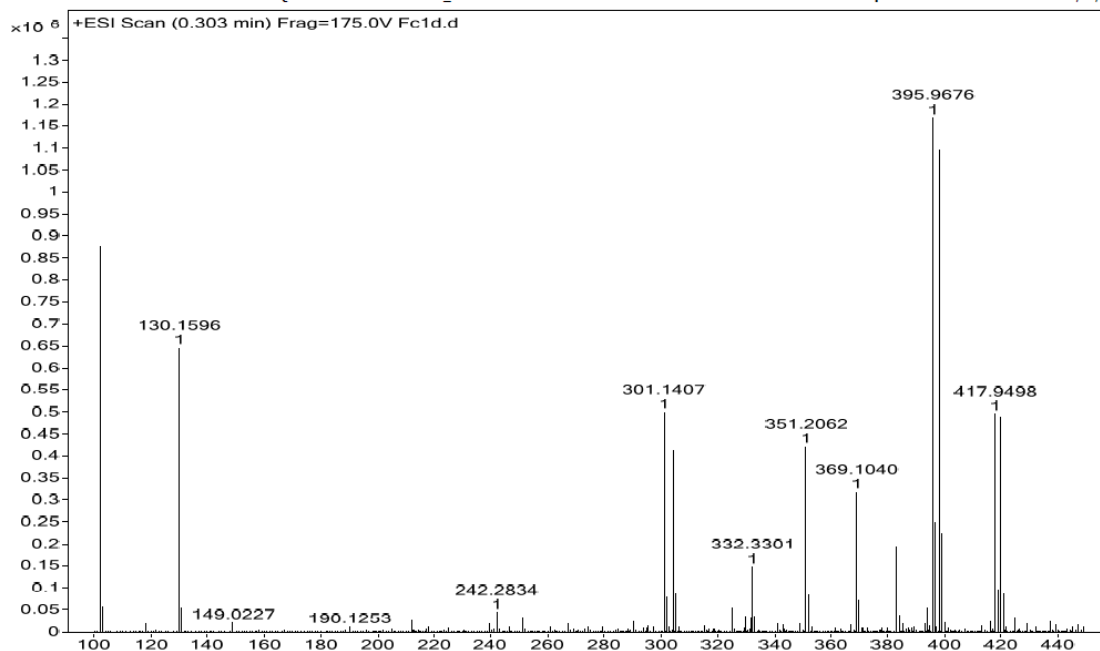

**Figure S1w:** HRMS spectrum of **1d** (M: C<sub>18</sub>H<sub>14</sub>BrFeNO); *m/z* calcd for [M+H<sup>+</sup>] 395.9728, *m/z* found for [M+H<sup>+</sup>] 395.9676, and *m/z* calcd for [M+Na<sup>+</sup>] 417.9552, *m/z* found for [M+Na<sup>+</sup>] 417.9498.

## SHIMADZU LabSolutions Analysis Report

### <Sample Information>

|                  |                               |              |                        |
|------------------|-------------------------------|--------------|------------------------|
| Sample Name      | : Fc1d                        | Sample Type  | : Unknown              |
| Sample ID        | : Fc1d                        | Acquired by  | : System Administrator |
| Data Filename    | : Fc1d_019.lcd                | Processed by | : System Administrator |
| Method Filename  | : B_95_D_5_10min_0_2mLmin.lcm |              |                        |
| Batch Filename   | : 081024.lcb                  |              |                        |
| Vial #           | : 1-79                        |              |                        |
| Injection Volume | : 2 uL                        |              |                        |
| Date Acquired    | : 10/8/2024 4:22:09 PM        |              |                        |
| Date Processed   | : 10/8/2024 4:32:15 PM        |              |                        |

mAU

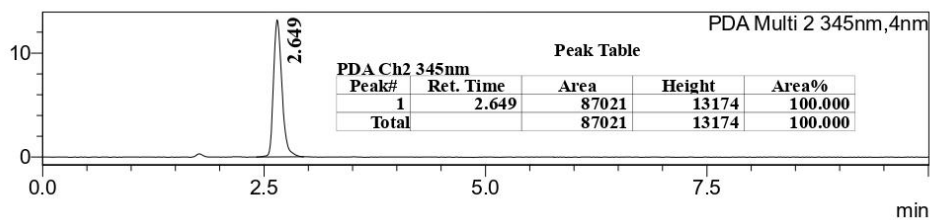

Retention Time : 2.649 min

UV Spectrum

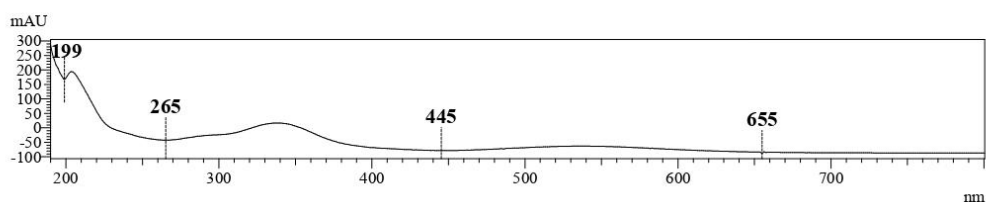

**Figure S1x:** RP-HPLC-MS **1d**; HPLC purity 100%; UV-vis spectrum shown at Rt = 2.649 min.

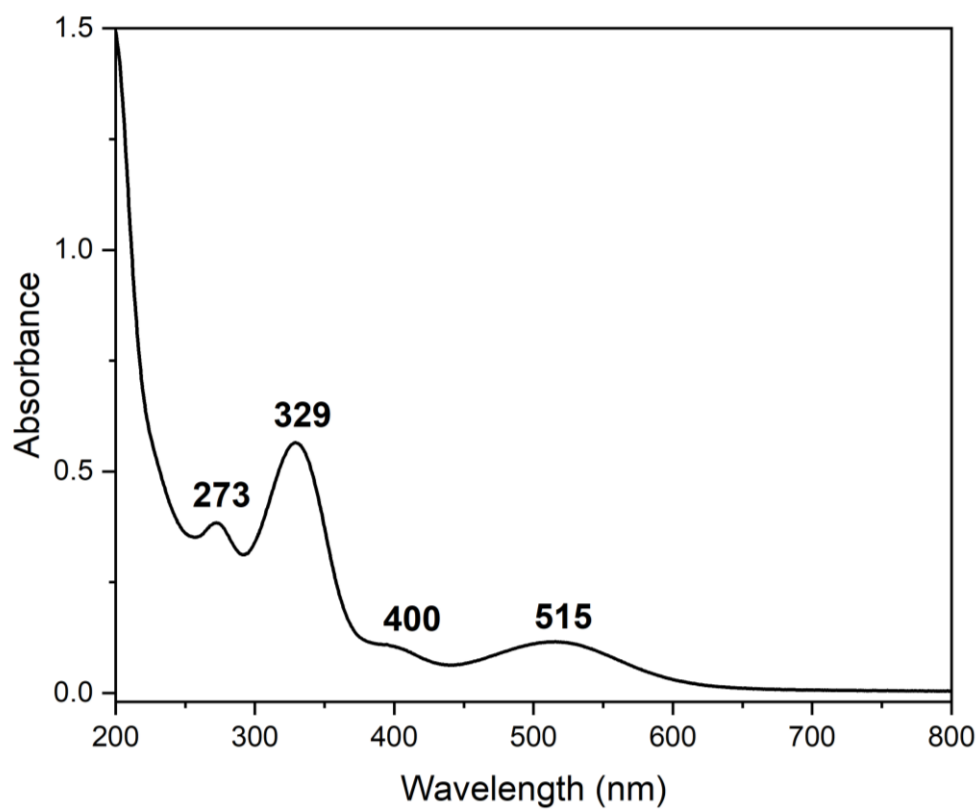

**Figure S1y:** Absorption spectra of **1a** (0.1  $\mu$ M) in acetonitrile.

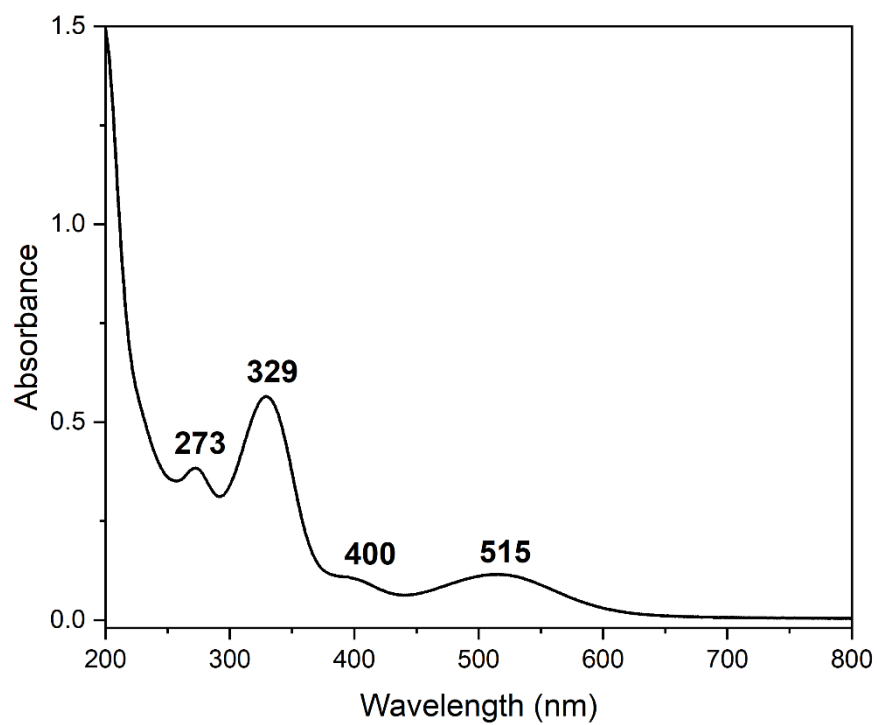

**Figure S1z:** Absorption spectrum of **1b** (0.1  $\mu$ M) in acetonitrile.

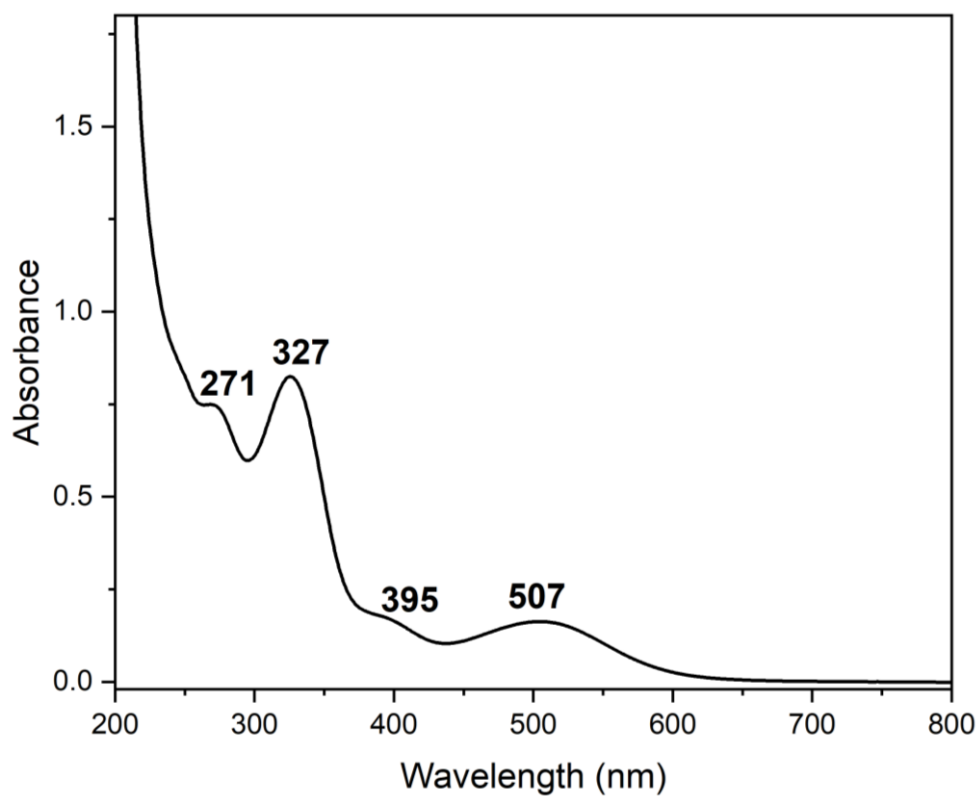

**Figure S1aa:** Absorption spectrum of **1c** (0.1  $\mu$ M) in acetonitrile.

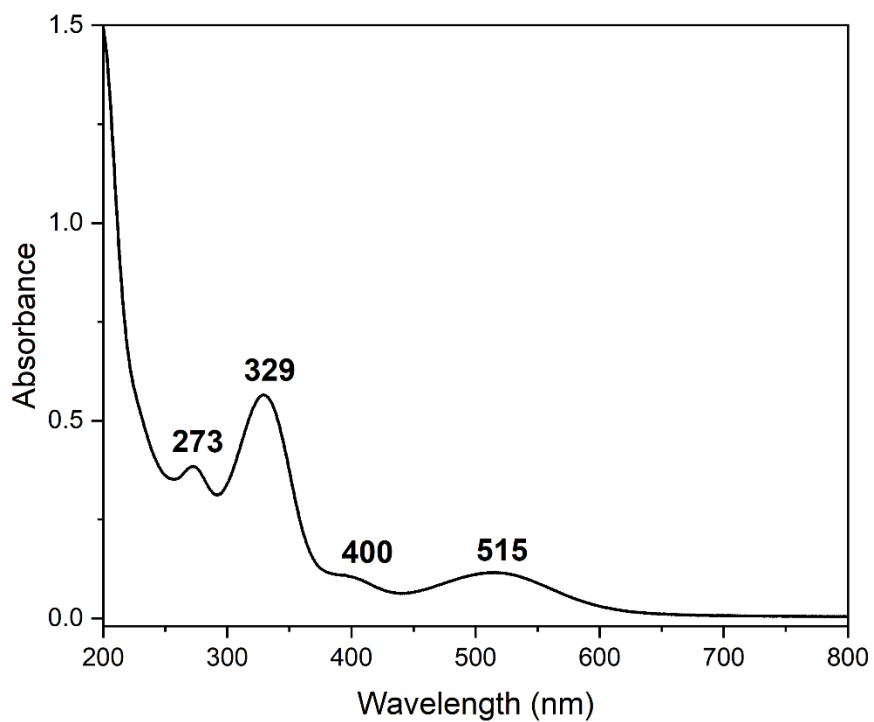

**Figure S1ab:** Absorption spectrum of **1d** (0.1  $\mu$ M) in acetonitrile.

Characterisation of ligands and by-products

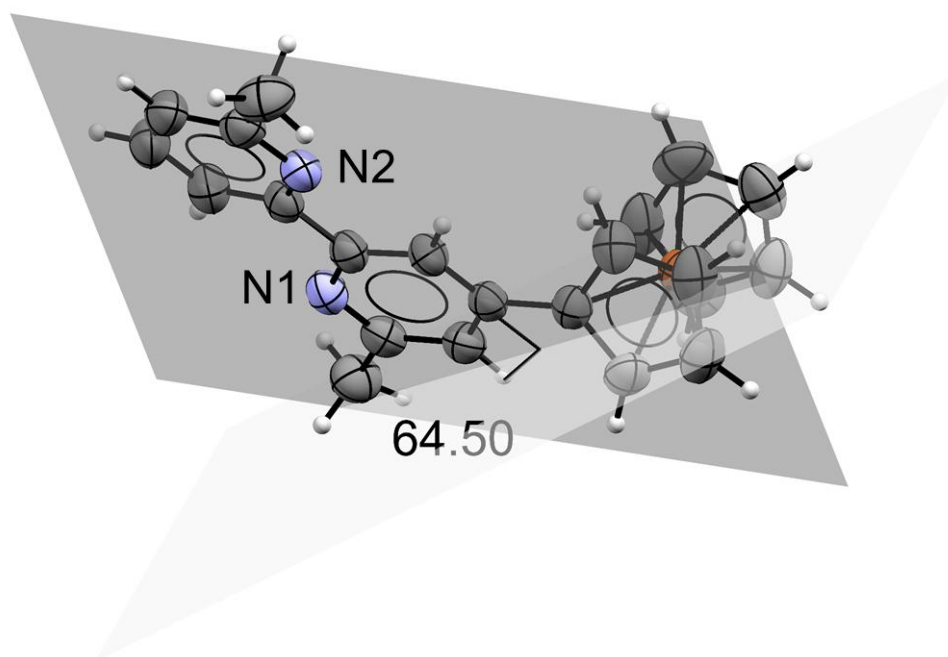

**Figure 2a:** The plane containing bpy rings (dark gray) and ferrocene unit (light gray) of ligand **2c**, present at an angle of  $64.50^\circ$  **2c** in a lattice unit cell.

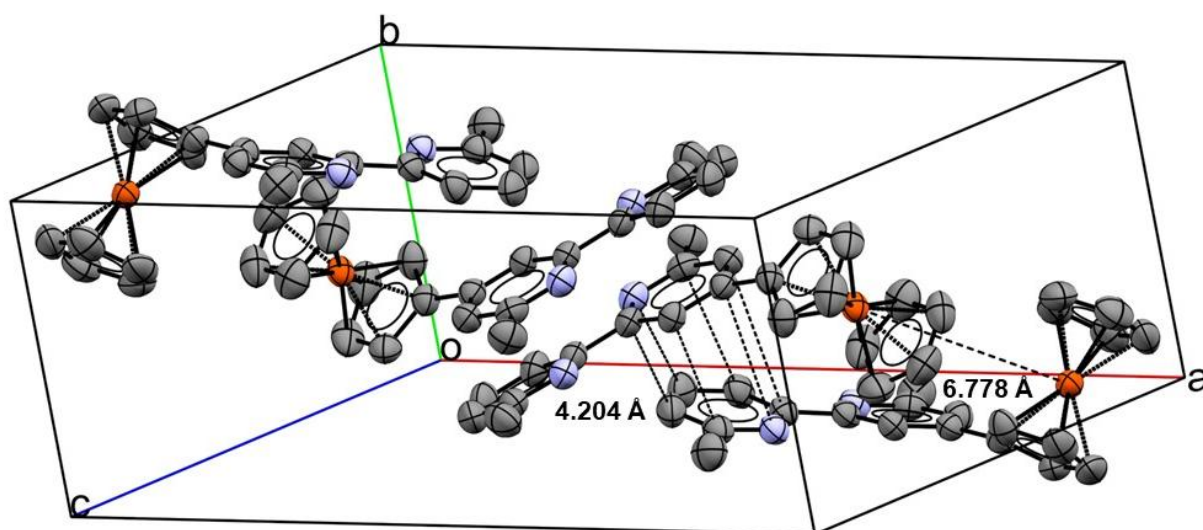

**Figure 2b:** **2c** in a lattice unit cell, showing the weak interactions between two pyridine rings (Hydrogens omitted for better clarity).

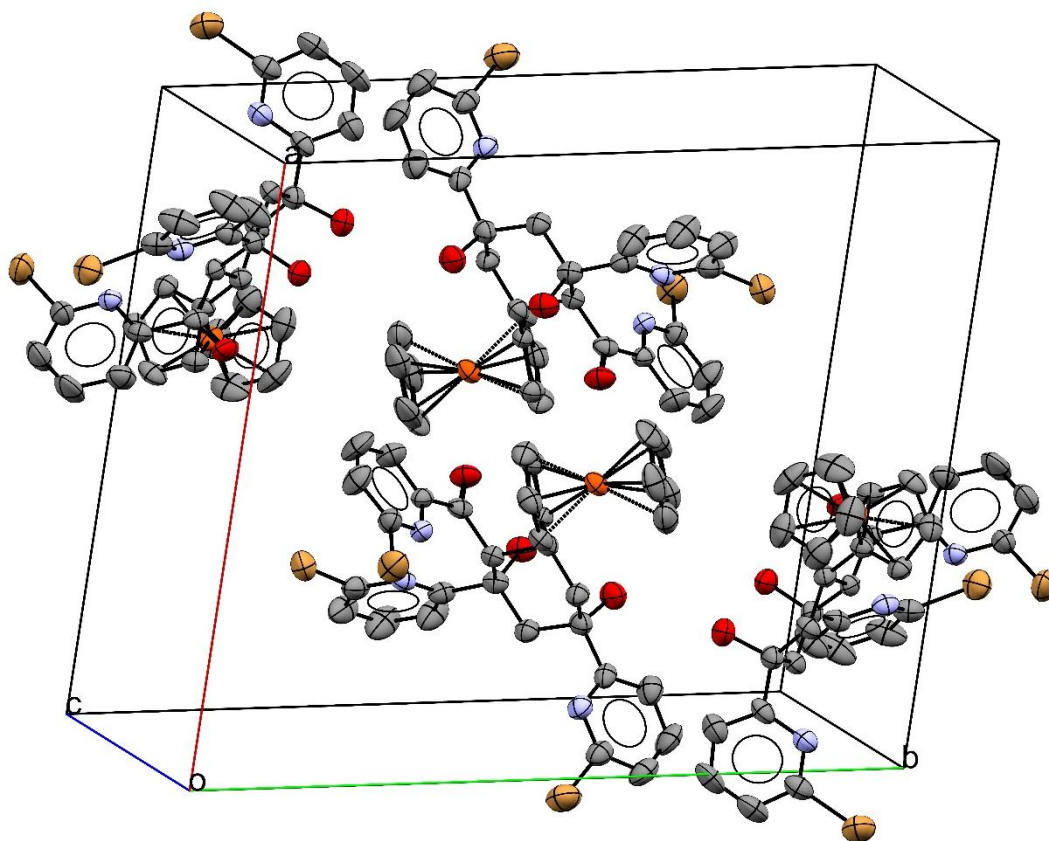

**Figure 2c:** **2d'** in a lattice unit cell (Hydrogens omitted for better clarity).

**Table S1:** Crystal data and structure refinement of **2c** and **2d'**.

| Identification code                         | <b>2c</b>                                         | <b>2d'</b>                                                                      |
|---------------------------------------------|---------------------------------------------------|---------------------------------------------------------------------------------|
| CCDC deposition number                      | 2443118                                           | 2532926                                                                         |
| Empirical formula                           | C <sub>22</sub> H <sub>20</sub> FeN <sub>2</sub>  | C <sub>32</sub> H <sub>26</sub> FeN <sub>3</sub> O <sub>3</sub> Br <sub>3</sub> |
| Formula weight                              | 368.3                                             | 796.1                                                                           |
| Temperature/K                               | 294.4(4)                                          | 294.4                                                                           |
| Crystal system                              | monoclinic                                        | monoclinic                                                                      |
| Space group                                 | P2 <sub>1</sub> /c                                | P2 <sub>1</sub> /c                                                              |
| a/Å                                         | 21.0623(5)                                        | 18.0545(5)                                                                      |
| b/Å                                         | 7.53961(18)                                       | 20.0248(4)                                                                      |
| c/Å                                         | 11.3467(3)                                        | 8.56605(19)                                                                     |
| α/°                                         | 90                                                | 90                                                                              |
| β/°                                         | 102.639(2)                                        | 101.989(2)                                                                      |
| γ/°                                         | 90                                                | 90                                                                              |
| Volume/Å <sup>3</sup>                       | 1758.21(8)                                        | 3029.40(13)                                                                     |
| Z                                           | 4                                                 | 4                                                                               |
| ρ <sub>calc</sub> g/cm <sup>3</sup>         | 1.3912                                            | 1.7456                                                                          |
| μ/mm <sup>-1</sup>                          | 0.863                                             | 4.493                                                                           |
| F(000)                                      | 768                                               | 1576                                                                            |
| Crystal size/mm <sup>3</sup>                | 0.299 × 0.222 × 0.011                             | 0.469 × 0.049 × 0.026                                                           |
| Radiation                                   | Mo Kα (λ = 0.71073)                               | Mo Kα (λ = 0.71073)                                                             |
| 2θ range for data collection/°              | 3.96 to 65.62                                     | 3.08 to 65.52                                                                   |
| Index ranges                                | -31 ≤ h ≤ 31, -11 ≤ k ≤ 10,<br>-16 ≤ l ≤ 16       | -27 ≤ h ≤ 27, -28 ≤ k ≤ 30,<br>-12 ≤ l ≤ 12                                     |
| Reflections collected                       | 56982                                             | 92048                                                                           |
| Independent reflections                     | 6156 [R <sub>int</sub> = 0.0539]                  | 10610 [R <sub>int</sub> = 0.1078]                                               |
| Data/restraints/parameters                  | 6156/0/226                                        | 10610/4/387                                                                     |
| Goodness-of-fit on F <sup>2</sup>           | 1.105                                             | 1.125                                                                           |
| Final R indexes [I >= 2σ (I)]               | R <sub>1</sub> = 0.0338, wR <sub>2</sub> = 0.1029 | R <sub>1</sub> = 0.0583, wR <sub>2</sub> = 0.1553                               |
| Final R indexes [all data]                  | R <sub>1</sub> = 0.0667, wR <sub>2</sub> = 0.1191 | R <sub>1</sub> = 0.1643, wR <sub>2</sub> = 0.2195                               |
| Largest diff. peak/hole / e Å <sup>-3</sup> | 0.13/-0.17                                        | 0.52/-0.28                                                                      |

**Table S2:** Selected bond lengths and bond angles for ligand **2c**.

| Bond lengths of 2c |      |          |            |      |      |          |            |
|--------------------|------|----------|------------|------|------|----------|------------|
| atom               | atom | length/Å |            | atom | atom | length/Å |            |
| N1                 | C13  | 1.337(2) |            | N2   | C14  | 1.326(2) |            |
| N1                 | C7   | 1.342(2) |            | N2   | C8   | 1.337(2) |            |
| C13                | C8   | 1.491(2) |            | C13  | C8   | 1.491(2) |            |
| C2                 | Fe1  | 2.037(1) |            | C5   | Fe1  | 2.027(2) |            |
| Bond angles of 2c  |      |          |            |      |      |          |            |
| atom               | atom | atom     | angle/°    | atom | atom | atom     | angle/°    |
| N2                 | C8   | C13      | 116.23(12) | C8   | N2   | C14      | 118.27(12) |
| N1                 | C13  | C8       | 116.86(12) | C21  | C7   | N1       | 115.81(14) |
| Fe1                | C2   | C1       | 125.91(9)  | C20  | C14  | N2       | 116.20(12) |

**Table S3:** Selected bond lengths and bond angles for ligand **2d'**.

| Bond lengths of 2d' |      |          |          |      |      |          |          |
|---------------------|------|----------|----------|------|------|----------|----------|
| atom                | atom | length/Å |          | atom | atom | length/Å |          |
| C8                  | C16  | 1.524(4) |          | C2   | C5   | 1.494(4) |          |
| C16                 | C4   | 1.550(4) |          | C3   | C7   | 1.523(4) |          |
| C4                  | C3   | 1.546(4) |          | C7   | N2   | 1.334(4) |          |
| C3                  | C22  | 1.511(4) |          | C25  | C17  | 1.521(4) |          |
| C22                 | C25  | 1.535(4) |          | C17  | N3   | 1.346(4) |          |
| C25                 | O3   | 1.429(4) |          | C16  | C1   | 1.501(4) |          |
| O2                  | C3   | 1.443(3) |          | C1   | Fe1  | 2.047(3) |          |
| C4                  | C5   | 1.515(4) |          | Fe1  | C12  | 2.038(4) |          |
| C5                  | O1   | 1.219(3) |          | C18  | Br3  | 1.905(3) |          |
| Bond angles of 2d'  |      |          |          |      |      |          |          |
| atom                | atom | atom     | angle/°  | atom | atom | atom     | angle/°  |
| C4                  | C3   | C22      | 109.6(2) | C25  | O3   | H1O3     | 109.4(9) |
| C3                  | C22  | C25      | 114.1(2) | C16  | C1   | Fe1      | 132.5(2) |
| C22                 | C25  | C8       | 110.8(3) | C4   | C5   | O1       | 121.0(3) |
| C25                 | C8   | C16      | 113.3(3) | C4   | C5   | C2       | 119.5(2) |
| C16                 | C4   | C3       | 110.9(2) | C3   | C7   | N2       | 115.6(3) |
| C25                 | C17  | N3       | 115.4(3) | C5   | C2   | N1       | 117.1(2) |

**2a**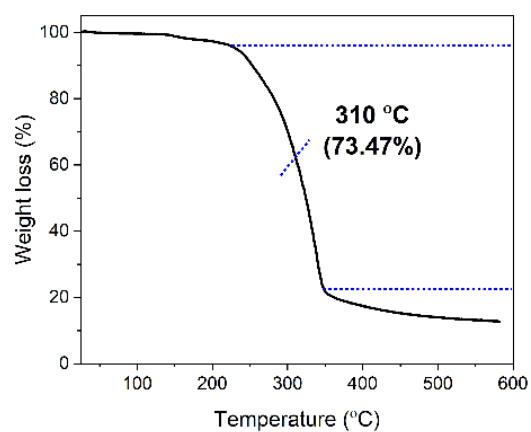**2b**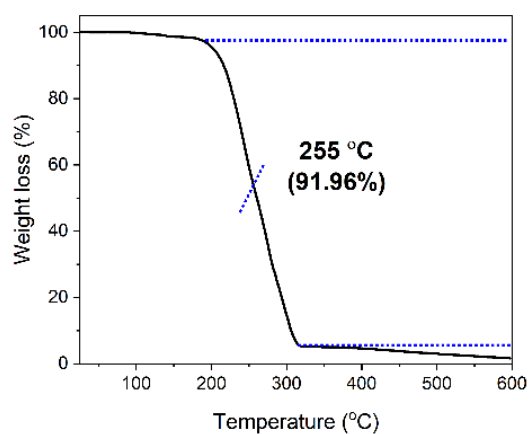**2d**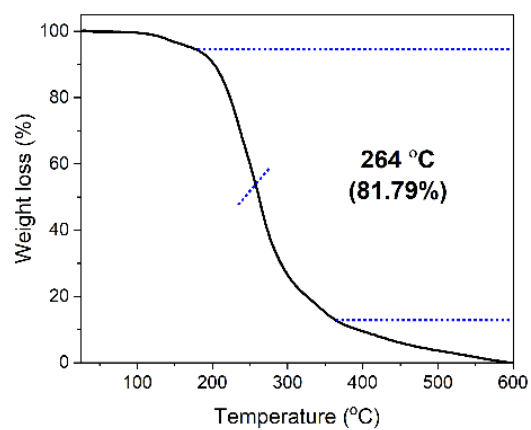**2e**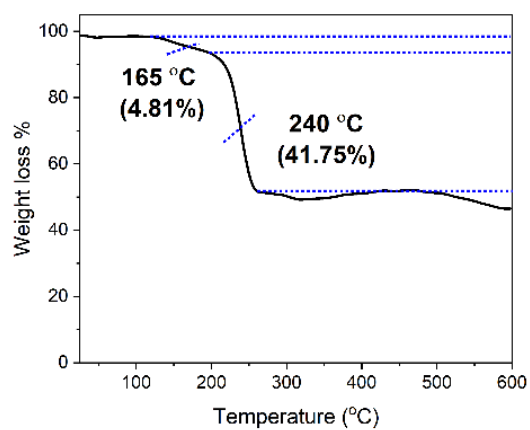

**Figure S2d:** Thermogravimetric profile of ligands **2a**, **2c**, **2d**, and **2e** measured from 25–600 °C, with a heating rate of 10K/min under N<sub>2</sub> flow.

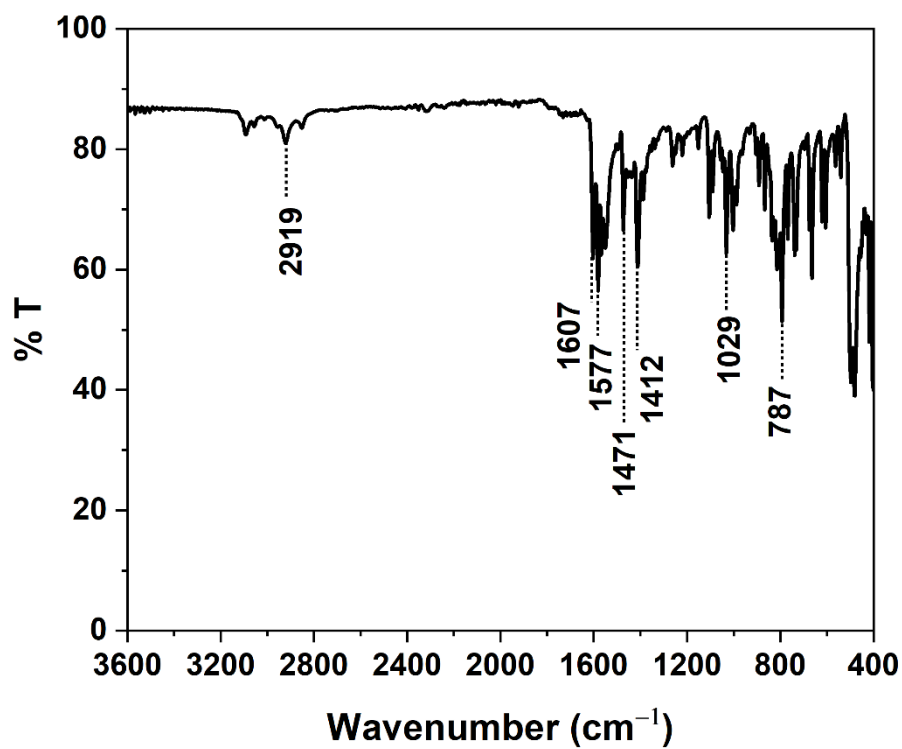

Figure S2e: ATR-IR spectrum of ligand 2a.

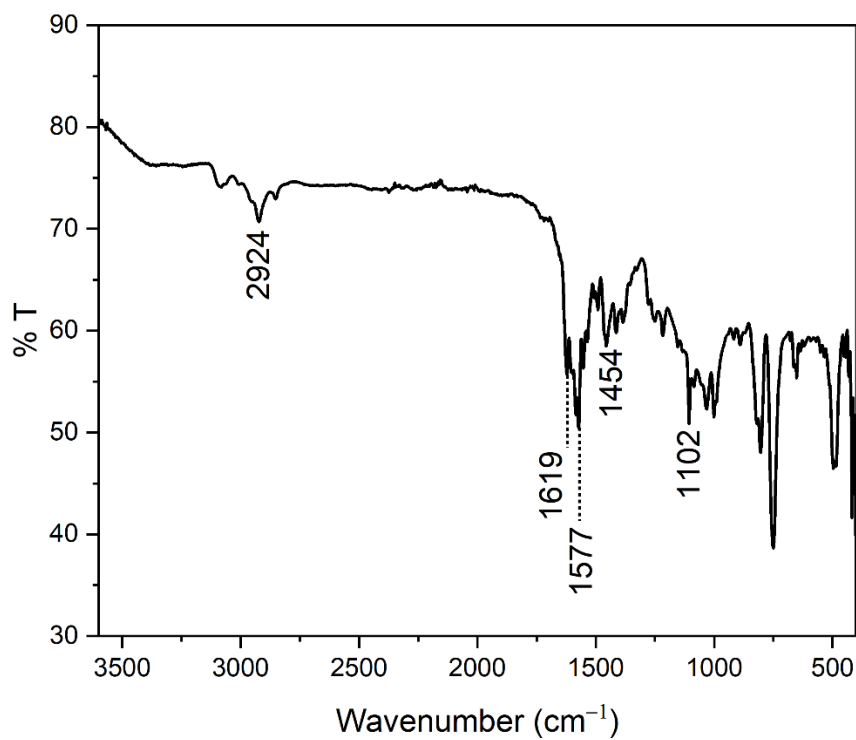

Figure S2f: ATR-IR spectrum of ligand 2b.

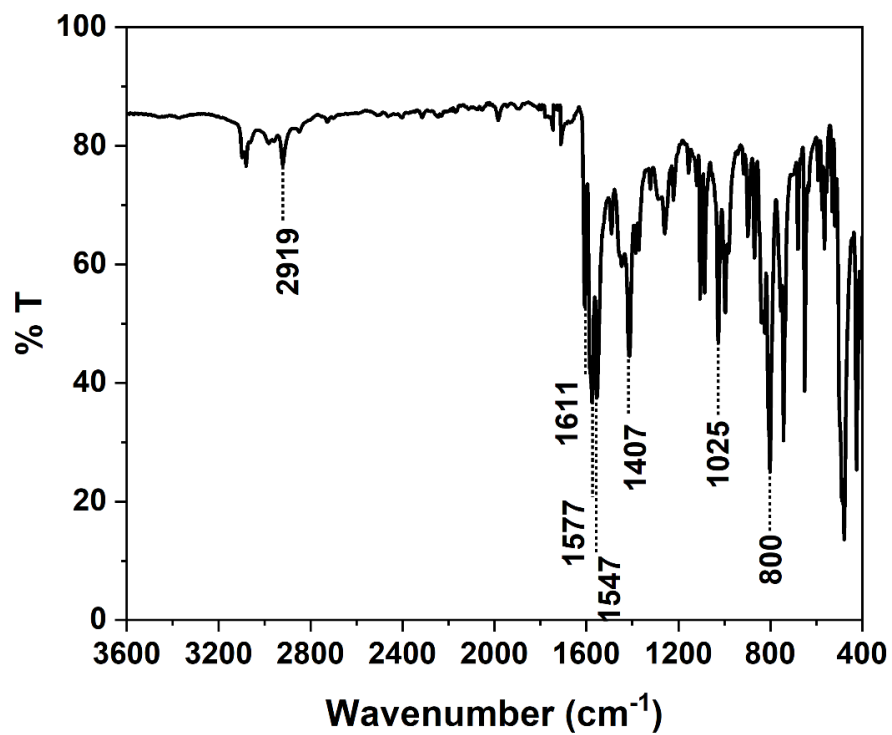

Figure S2g: ATR-IR spectrum of ligand 2c.

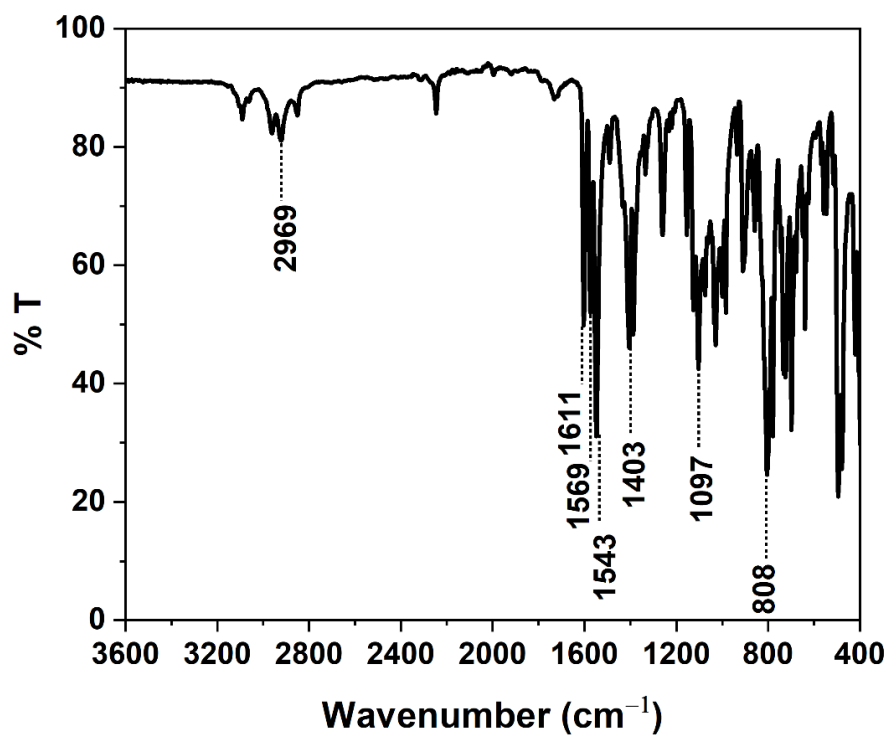

Figure S2h: ATR-IR spectrum of ligand 2d.

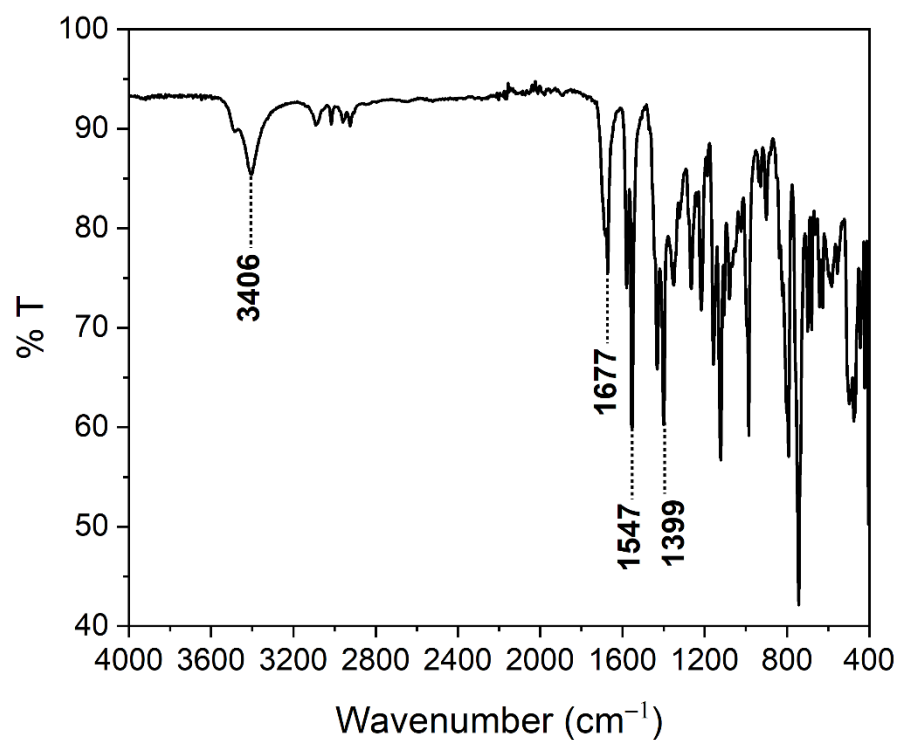

**Figure S2i:** ATR-IR spectrum of by-product 2d'.

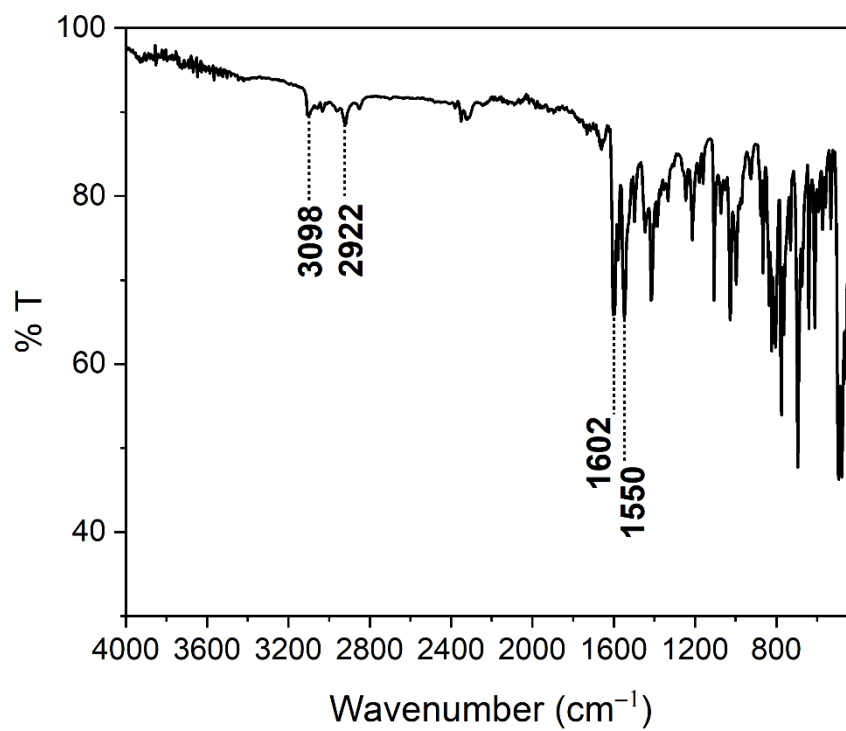

**Figure S2j:** ATR-IR spectrum of by-product 2e.

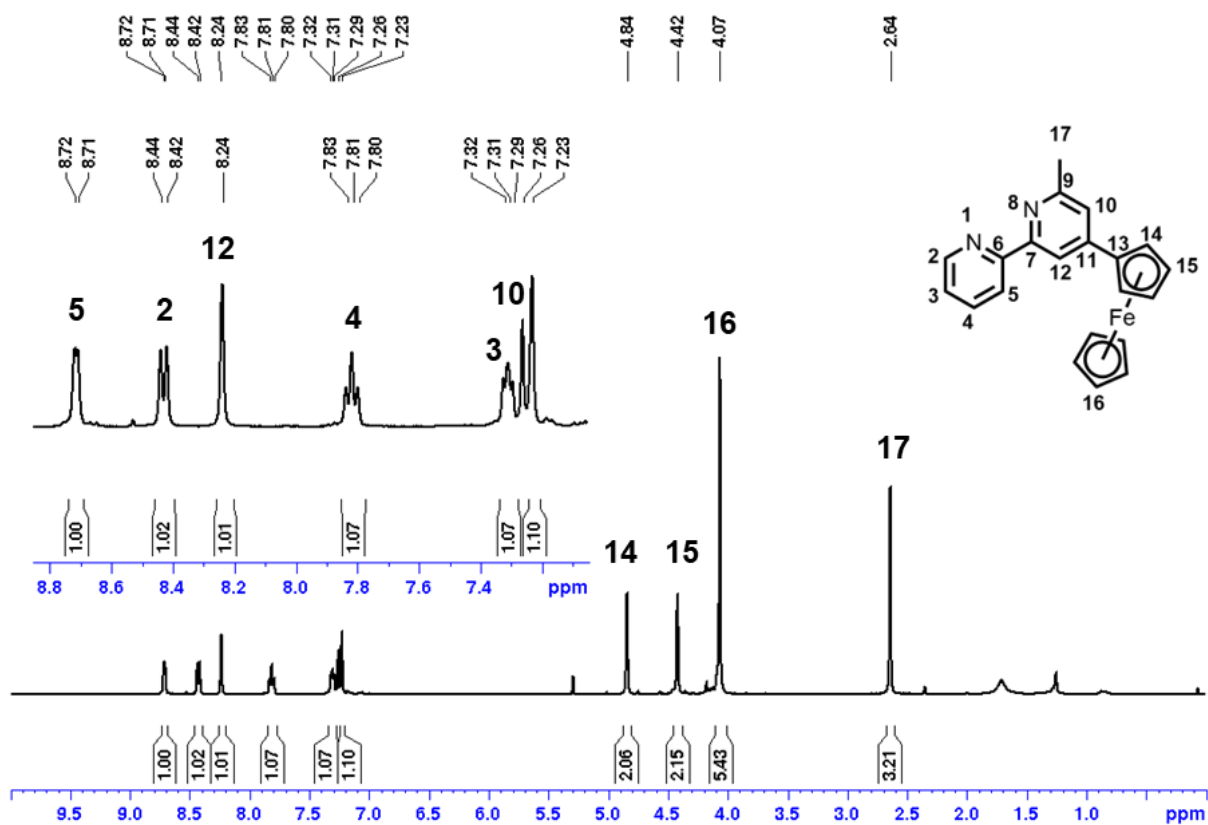

Figure S2k:  $^1\text{H NMR}$  (CDCl<sub>3</sub>, 400 MHz) spectrum of **2a**.

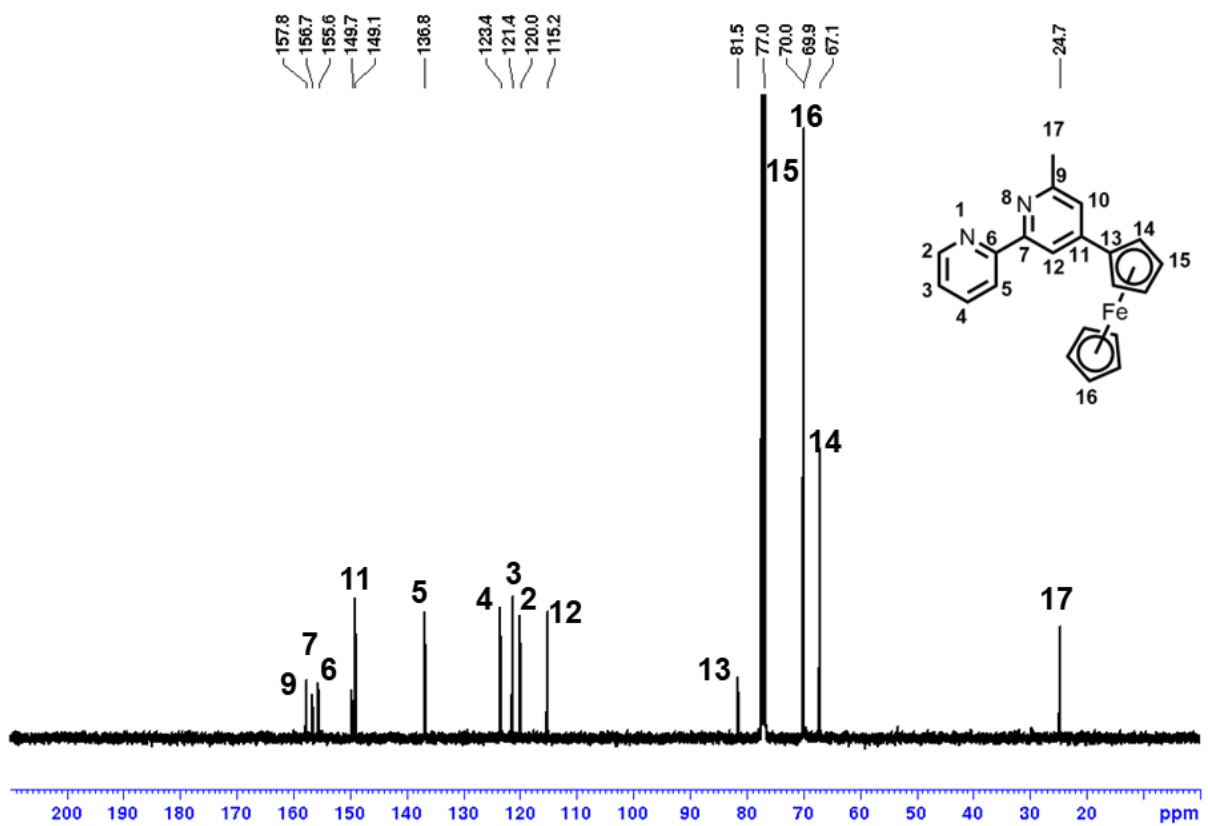

Figure S2l:  $^{13}\text{C}\{^1\text{H}\}$  NMR (101 MHz, CDCl<sub>3</sub>) spectrum of **2a**.

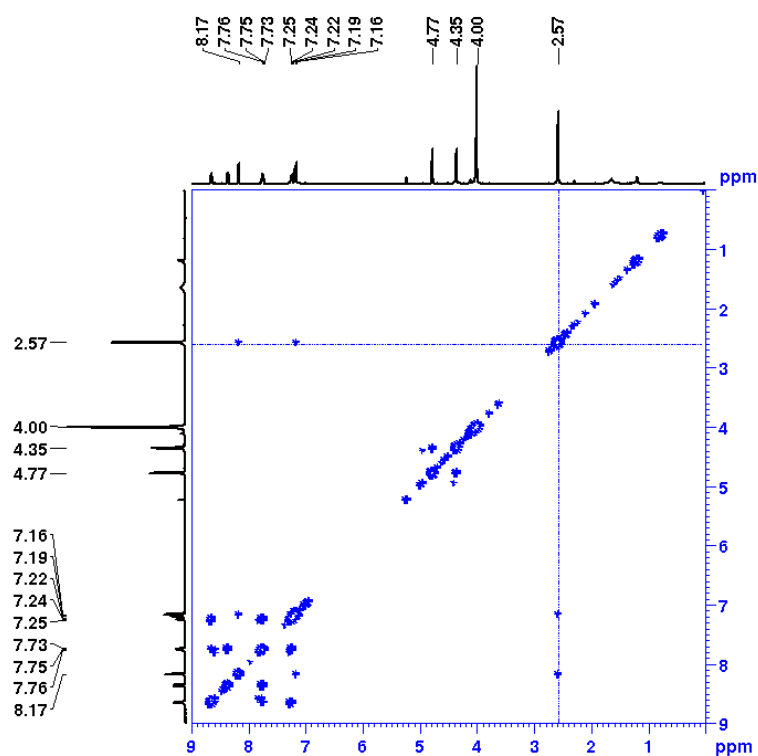

**Figure S2m:**  $^1\text{H}$ - $^1\text{H}$  correlation spectrum of **2a** (400 MHz,  $\text{CDCl}_3$ ); shows the correlation between the methyl and aromatic protons.

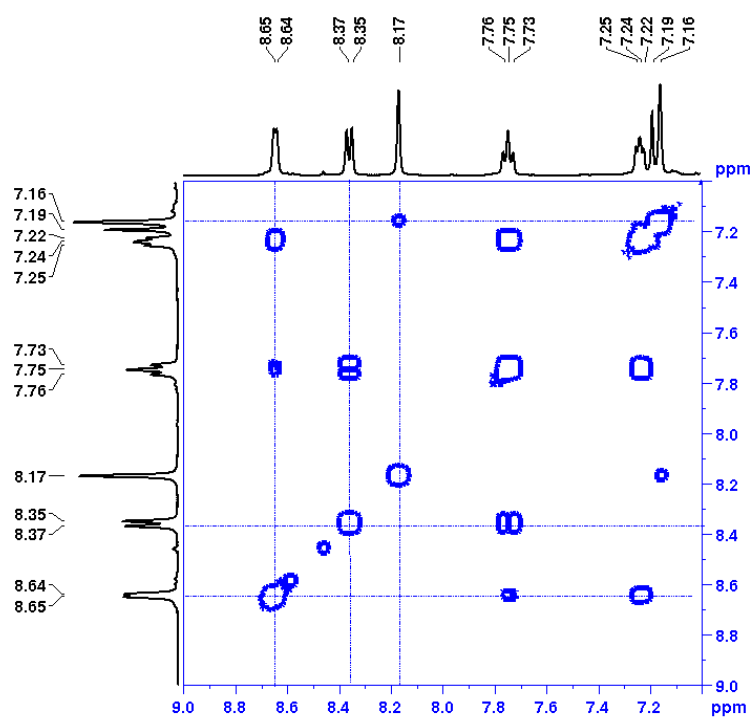

**Figure S2n:**  $^1\text{H}$ - $^1\text{H}$  correlation of **2a**, showing the correlations amongst the aromatic protons.

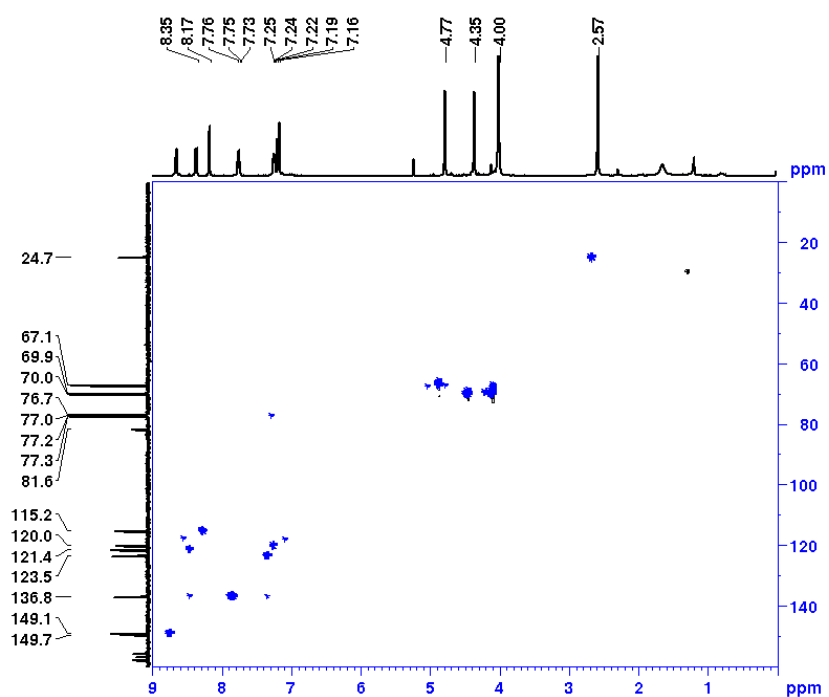

Figure S2o: HSQC spectrum of **2a** (400 MHz, CDCl<sub>3</sub>).

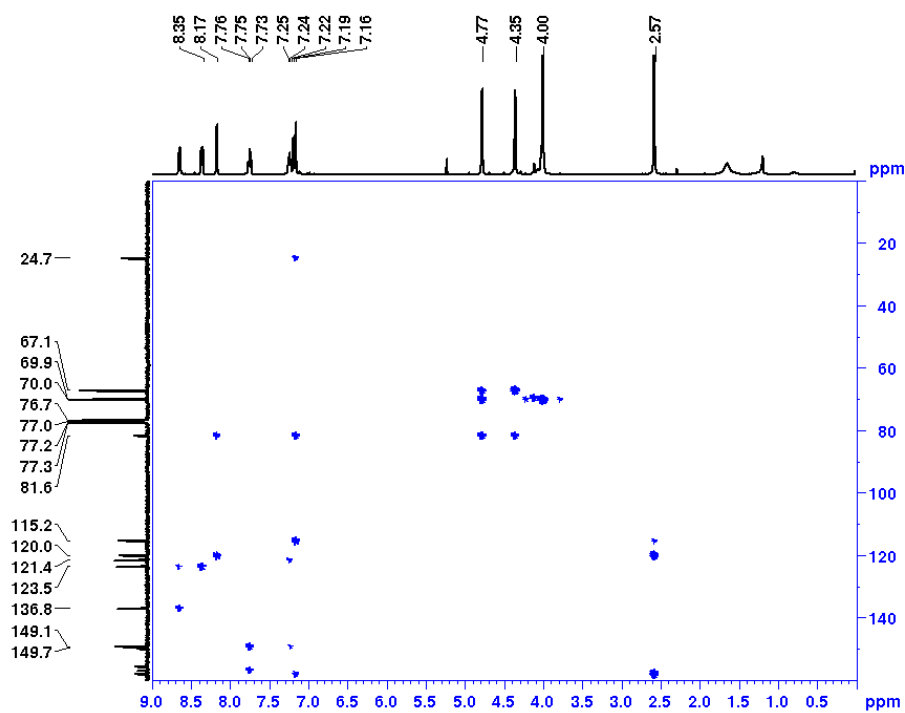

Figure S2p: HMBC spectrum of **2a** (400 MHz, CDCl<sub>3</sub>).

Sample Name Fc2a Position p1b5 Instrument Name QTOF User Name LCMSQTOF-PC\admin  
 Inj Vol 1 InjPosition InjPosition SampleType Sample IRM Calibration Status Success  
 Data Filename Fc2a.d ACQ Method direct\_mass\_+veESI.m Comment Acquired Time 12/11/2023 5:17:19 PM

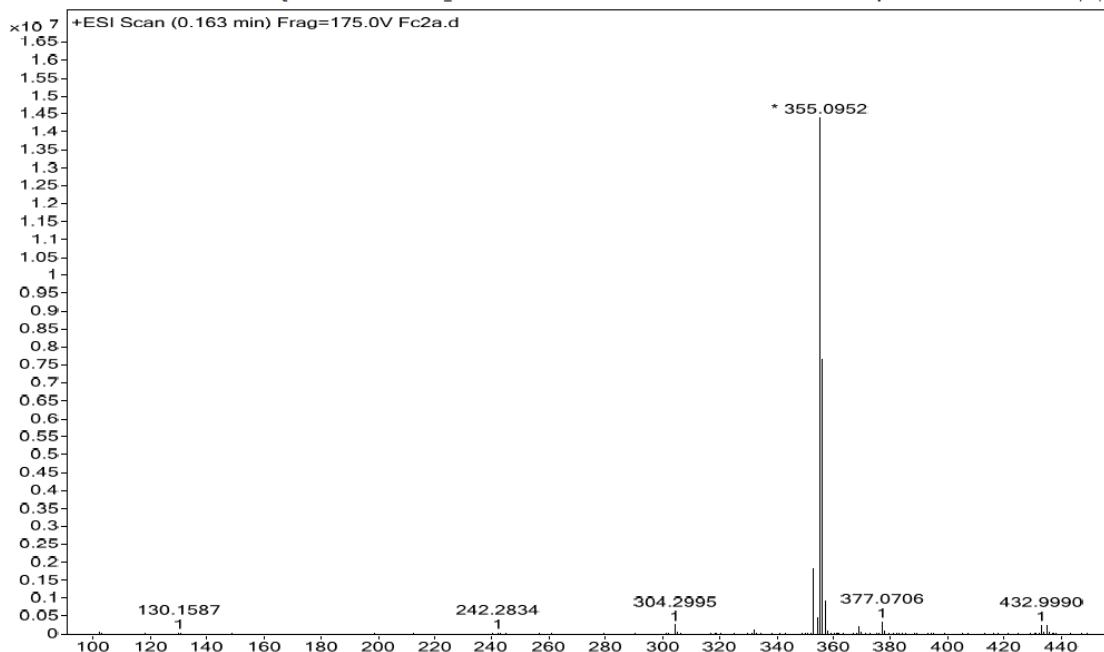

Figure S2q: HRMS spectrum of **2a** (M: C<sub>21</sub>H<sub>18</sub>FeN<sub>2</sub>) *m/z* calcd for [M+H<sup>+</sup>] 355.0939, *m/z* found for [M+H<sup>+</sup>] 355.0952.

## SHIMADZU LabSolutions Analysis Report

### <Sample Information>

Sample Name : Fc2a  
 Data Filename : Fc2a\_008.lcd  
 Method Filename : B\_95\_D\_5\_10min\_0\_2mLmin.lcm  
 Batch Filename : 01042024.lcb  
 Vial # : 1-93  
 Injection Volume : 1 uL  
 Date Acquired : 4/2/2024 1:18:34 PM  
 Date Processed : 4/2/2024 2:25:48 PM

Sample Type : Unknown  
 Acquired by : System Administrator  
 Processed by : System Administrator

mAU

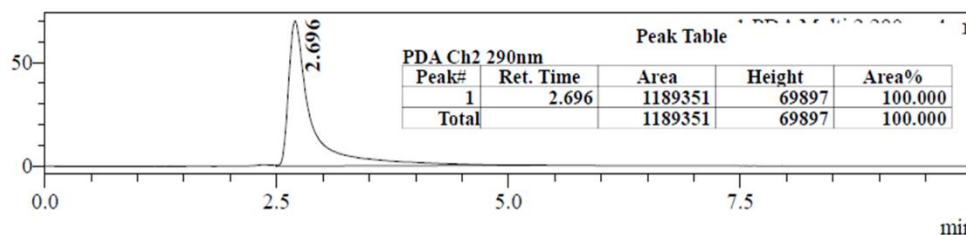

UV Spectrum

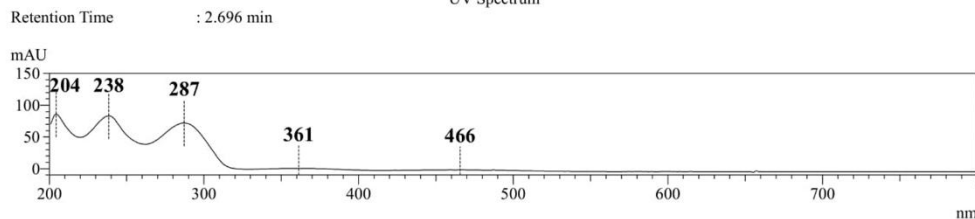

Figure S2r: RP-HPLC-MS of **2a**; HPLC purity 100%; UV-vis spectrum shown at Rt = 2.696 min.

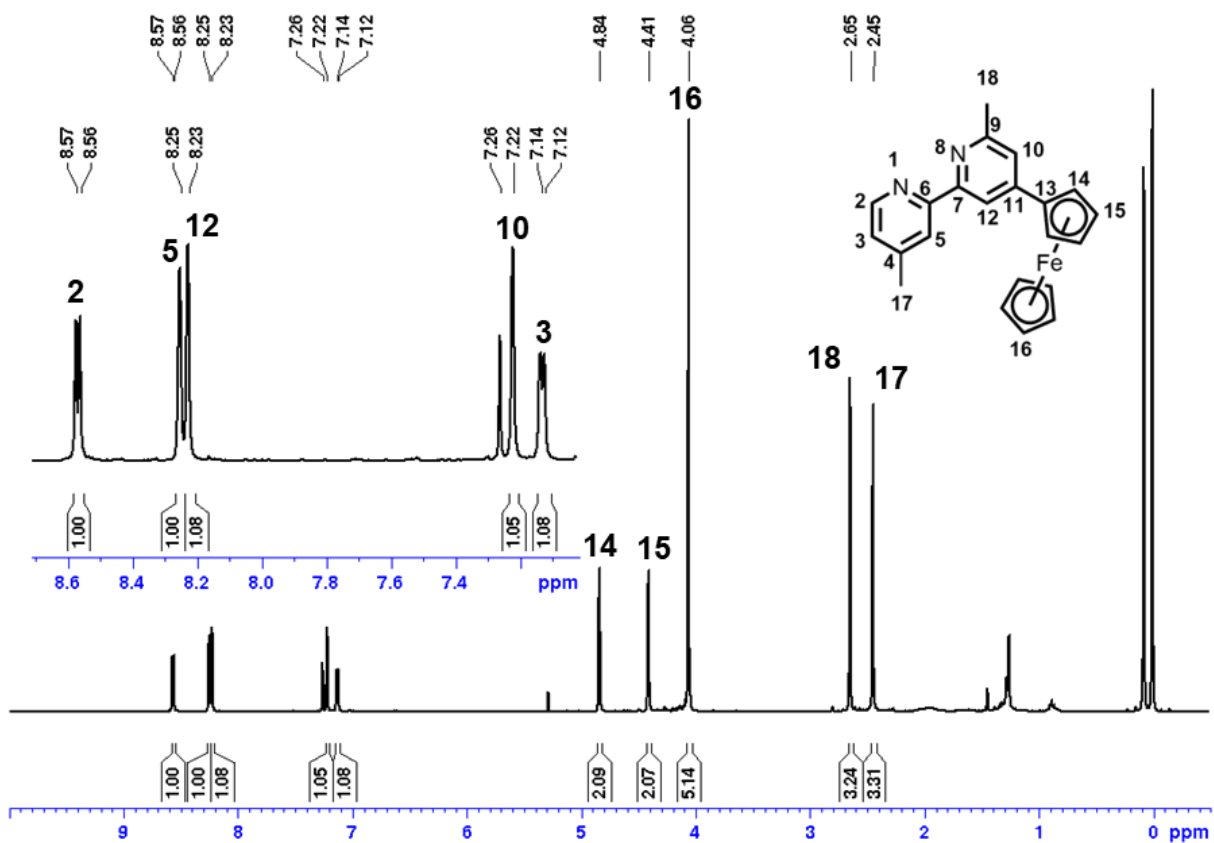

Figure S2s:  $^1\text{H NMR}$  (CDCl<sub>3</sub>, 400 MHz) spectrum of **2b**.

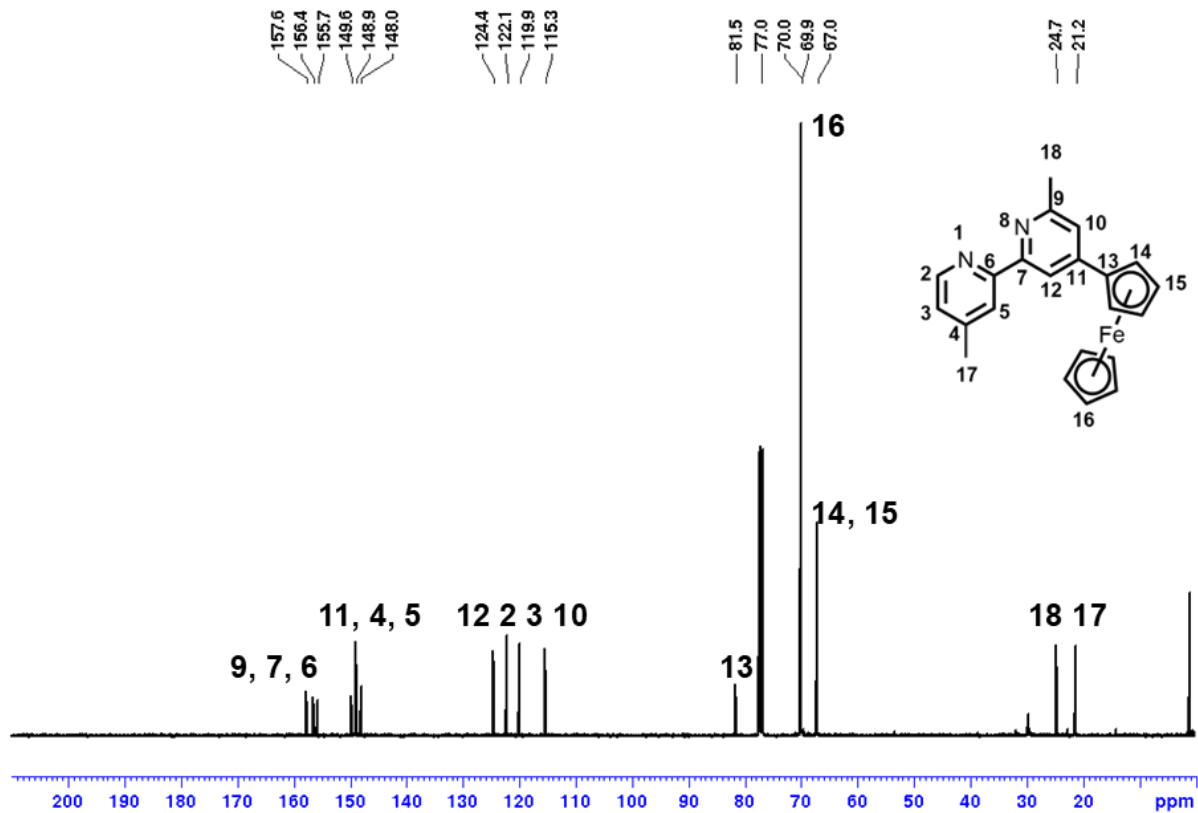

Figure S2t:  $^{13}\text{C}\{^1\text{H}\}$  NMR (101 MHz, CDCl<sub>3</sub>) spectrum of **2b**.

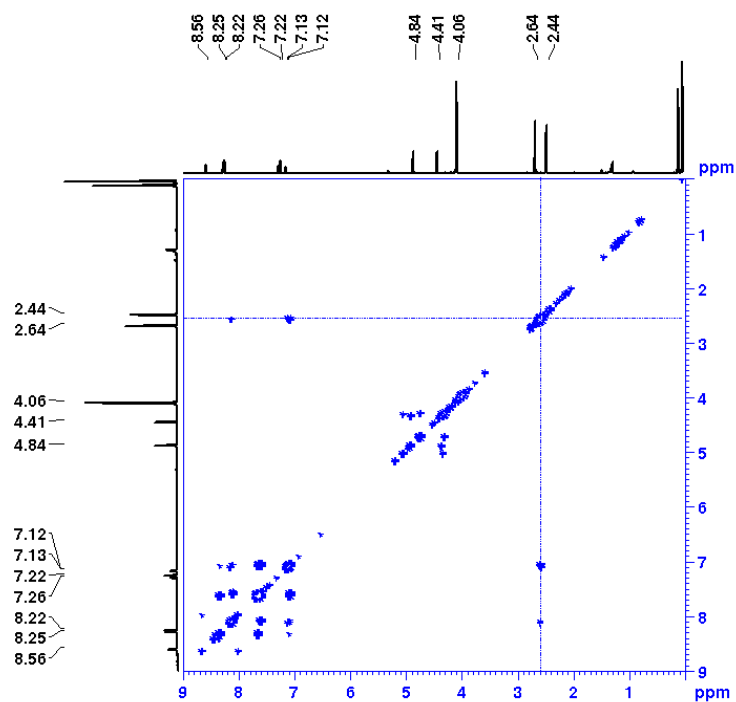

**Figure S2u:**  $^1\text{H}$ - $^1\text{H}$  correlation spectrum of **2b** (400 MHz,  $\text{CDCl}_3$ ); shows the correlation between the methyl and aromatic protons.

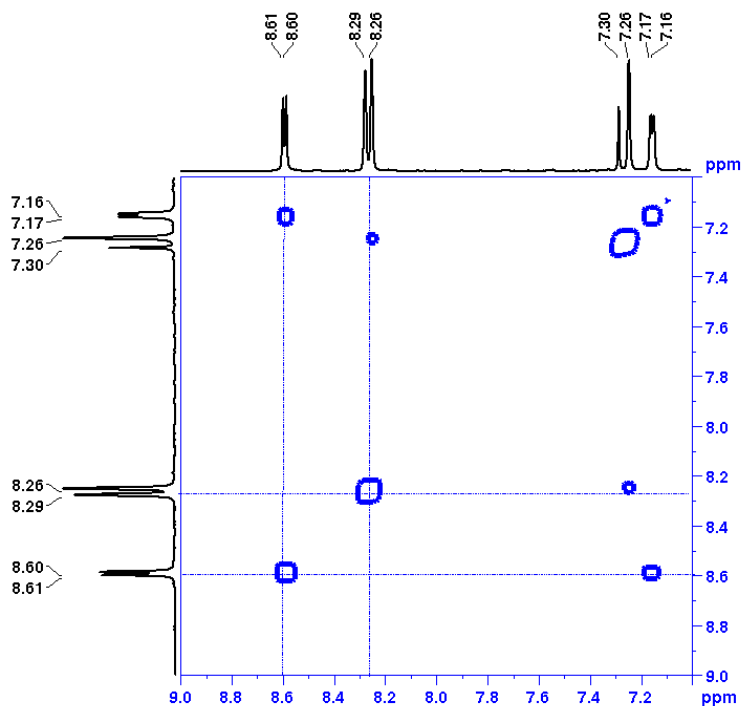

**Figure S2v:**  $^1\text{H}$ - $^1\text{H}$  correlation spectrum of **2b** showing correlations amongst the aromatic protons.

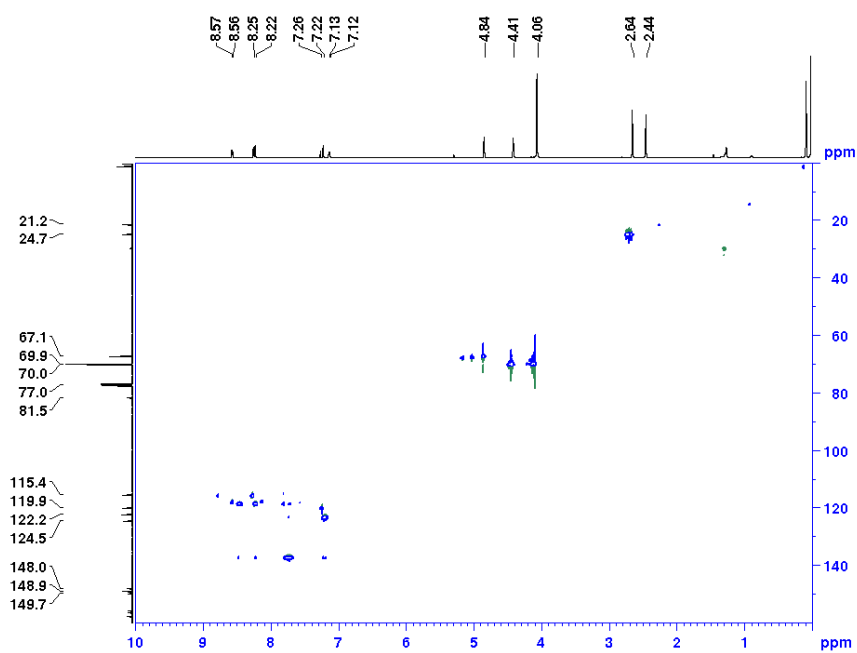

Figure S2w: HSQC spectrum of **2b** (400 MHz, CDCl<sub>3</sub>).

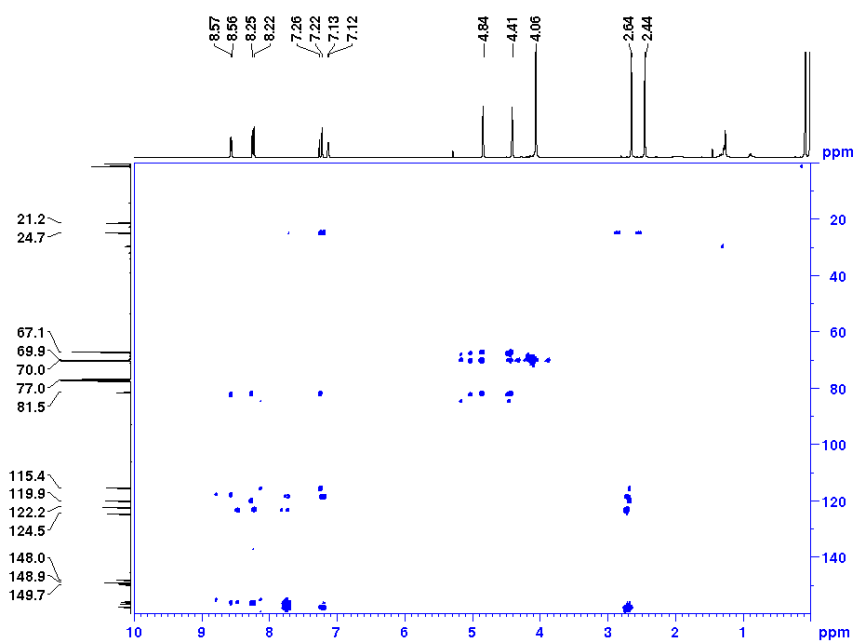

Figure S2x: HMBC spectrum of **2b** (400 MHz, CDCl<sub>3</sub>).

Sample Name Fc2b Position p1b1 Instrument Name QTOF User Name LCMSQTOF-PC\admin  
 Inj Vol 1 InjPosition SampleType Sample IRM Calibration Status Success  
 Data Filename Fc2b.d ACQ Method direct mass\_+veESI.m Comment Acquired Time 12/11/2023 5:02:19 PM

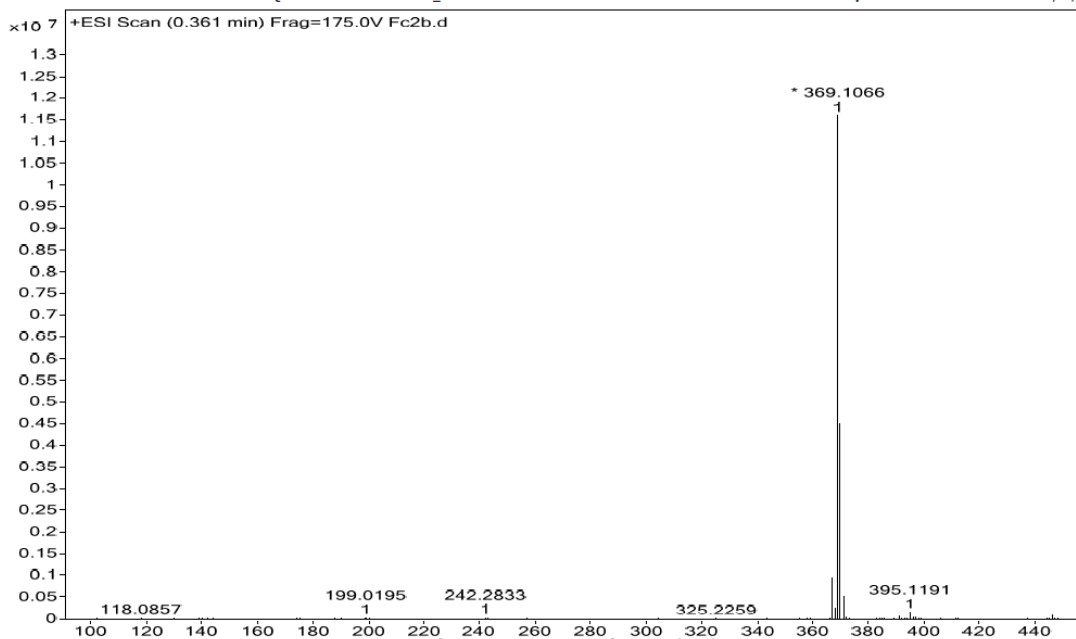

**Figure S2y:** HRMS spectrum of **2b** (M: C<sub>22</sub>H<sub>20</sub>FeN<sub>2</sub>) *m/z* calcd for [M+H<sup>+</sup>] 369.1095, *m/z* found for [M+H<sup>+</sup>] 369.1066.

## SHIMADZU LabSolutions Analysis Report

### <Sample Information>

Sample Name : Fc2b  
 Sample ID : Fc2d  
 Data Filename : Fc2b\_010.lcd  
 Method Filename : B\_95\_D\_5\_10min\_0\_2mLmin.lcm  
 Batch Filename : 01042024.lcb  
 Vial # : 1-94  
 Injection Volume : 1 uL  
 Date Acquired : 4/2/2024 1:35:16 PM  
 Date Processed : 4/2/2024 2:29:14 PM

Sample Type : Unknown  
 Acquired by : System Administrator  
 Processed by : System Administrator

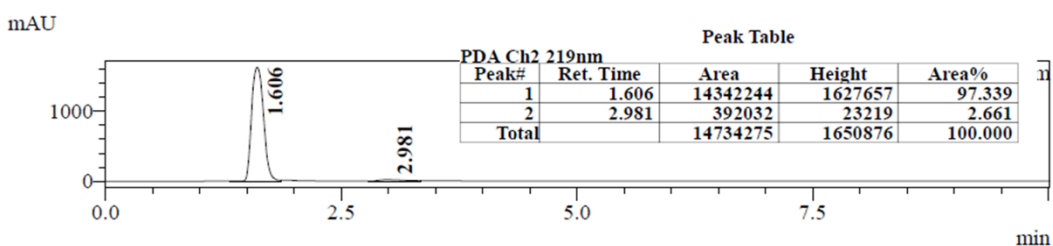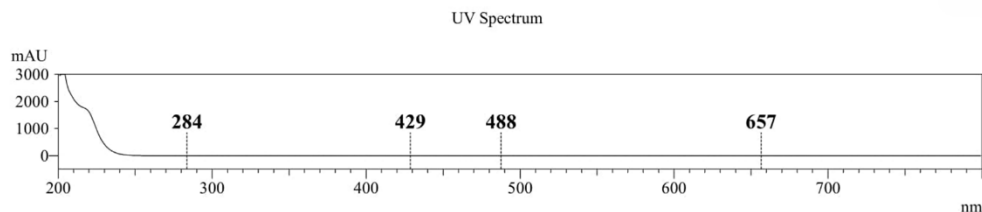

**Figure S2z:** RP-HPLC-MS of **2b**; HPLC purity 97%; UV-vis spectrum shown at Rt = 1.606 min.

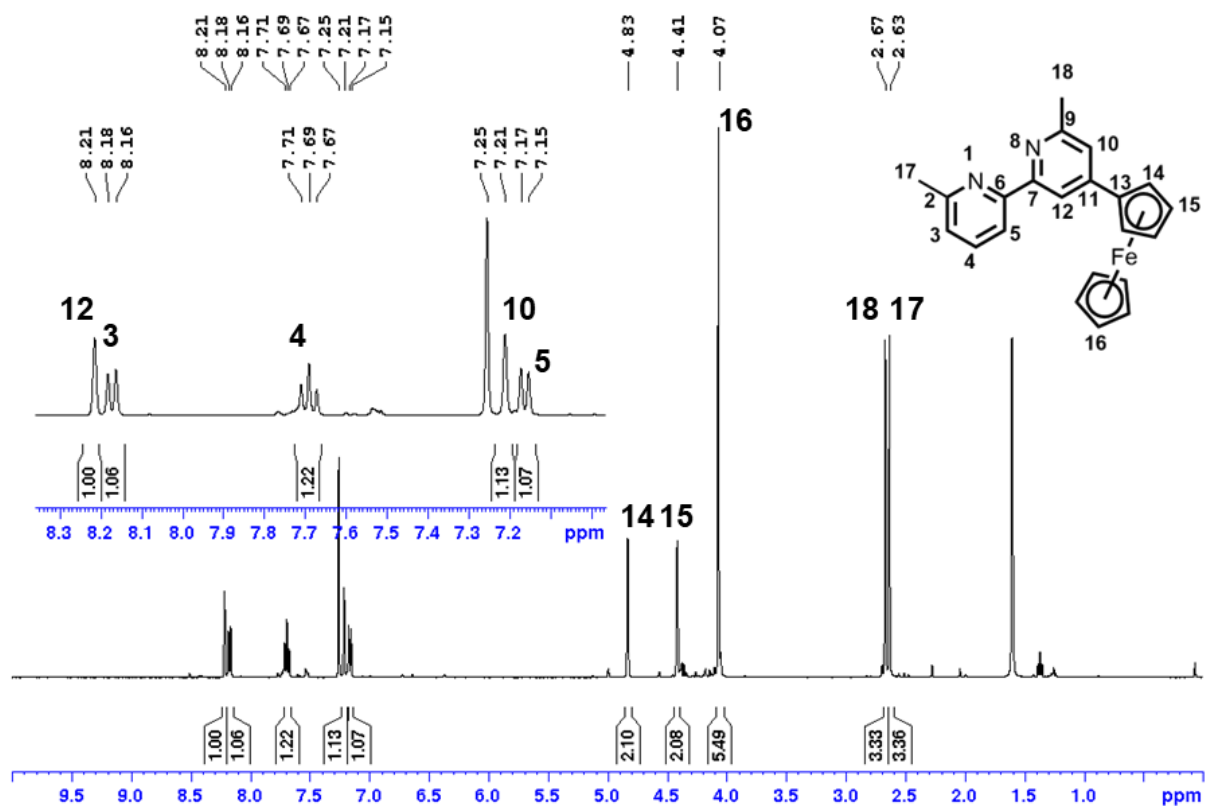

Figure S2aa:  $^1\text{H}$  NMR (CDCl<sub>3</sub>, 400 MHz) spectrum of **2c**.

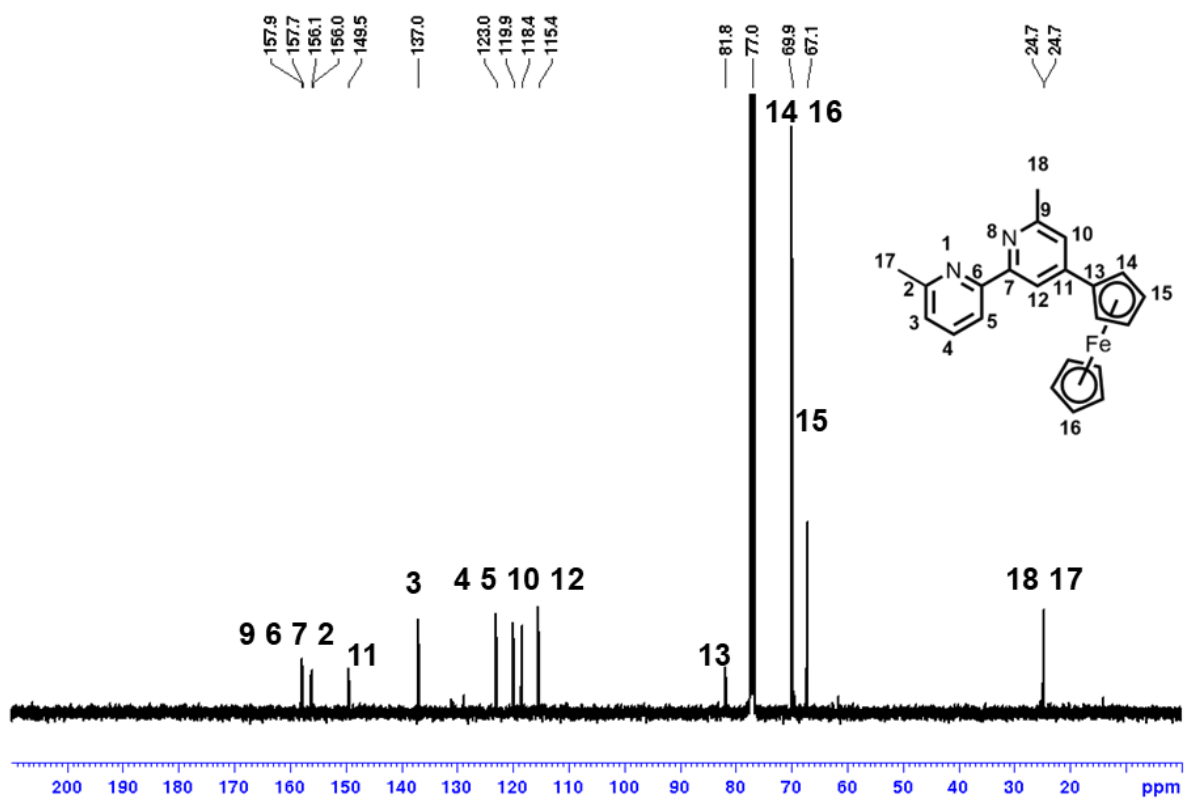

Figure S2ab:  $^{13}\text{C}\{^1\text{H}\}$  NMR (101 MHz, CDCl<sub>3</sub>) spectrum of **2c**.

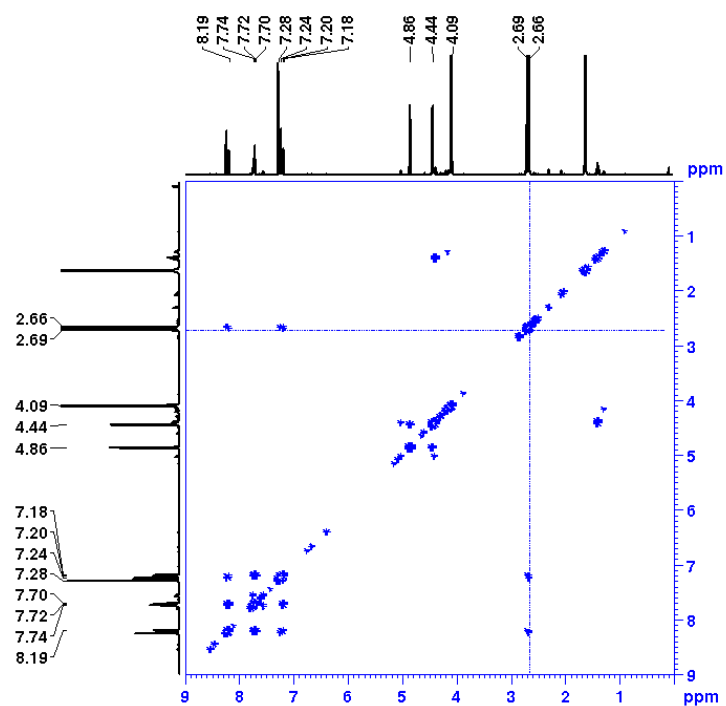

**Figure S2ac:**  $^1\text{H}$ - $^1\text{H}$  correlation spectrum of **2c** (400 MHz,  $\text{CDCl}_3$ ); shows the correlation between methyl and aromatic protons.

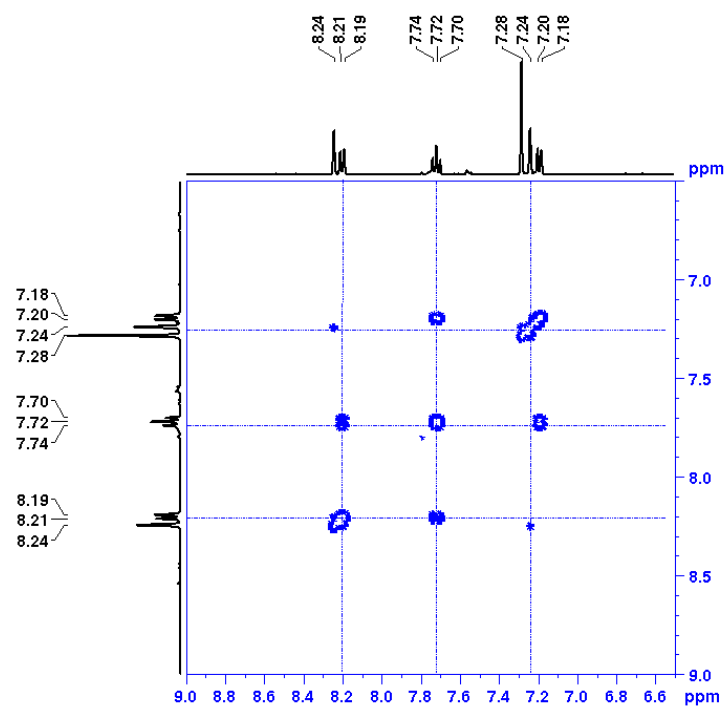

**Figure S2ad:**  $^1\text{H}$ - $^1\text{H}$  correlation spectrum of **2c**, showing the correlations amongst the aromatic protons.

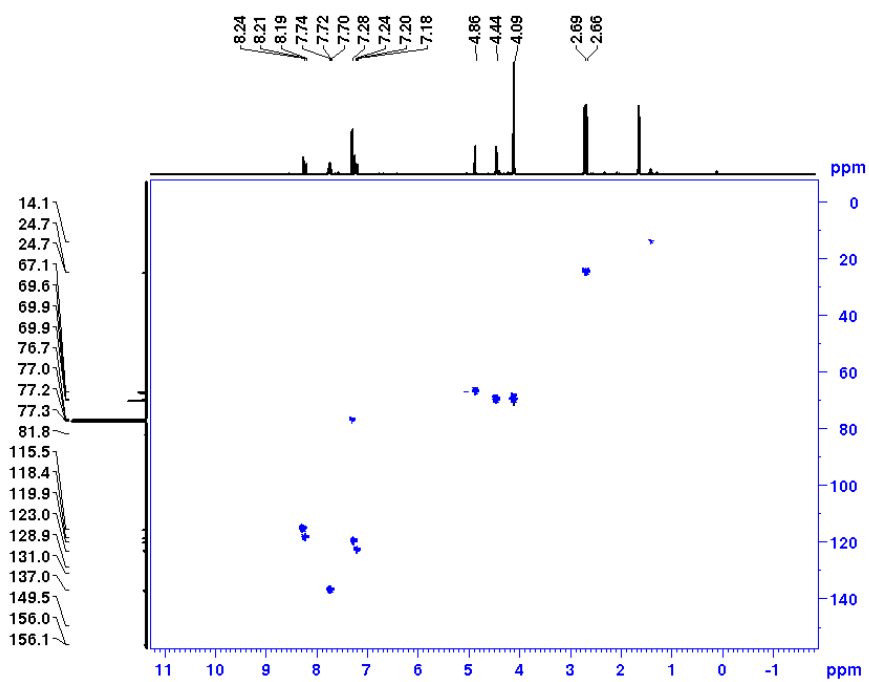

Figure S2ae: HSQC spectrum of **2c** (400 MHz, CDCl<sub>3</sub>).

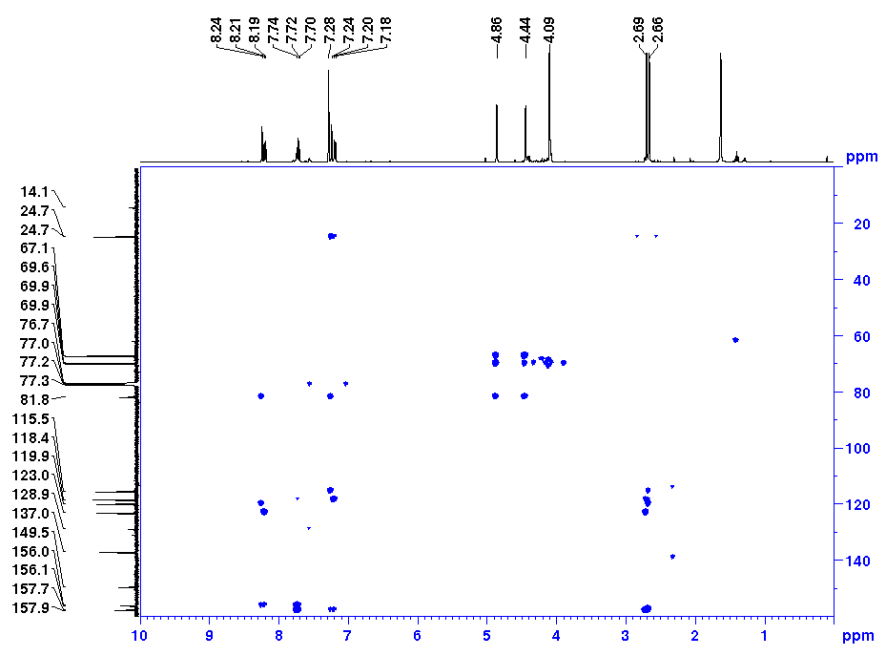

Figure S2af: HMBC spectrum of **2c** (400 MHz, CDCl<sub>3</sub>).

Sample Name Fc2c Position p1b6 Instrument Name QTOF User Name LCMSQTOF-PC\admin  
 Inj Vol 1 InjPosition InjPosition SampleType Sample IRM Calibration Status Success  
 Data Filename Fc2c.d ACQ Method direct.mass\_+veESLM Comment Acquired Time 12/11/2023 5:20:38 PM

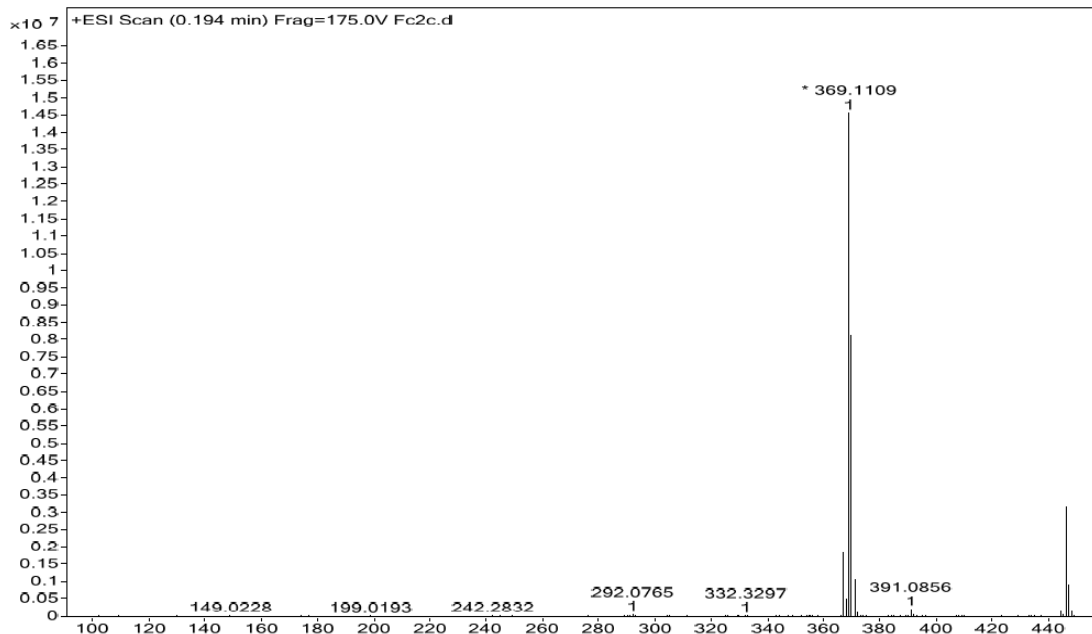

**Figure S2ag:** HRMS spectrum of **2c** (M: C<sub>22</sub>H<sub>20</sub>FeN<sub>2</sub>) *m/z* calcd for [M+H<sup>+</sup>] 369.1095, *m/z* found for [M+H<sup>+</sup>] 369.1109.

SHIMADZU LabSolutions **Analysis Report**

<Sample Information>

Sample Name : Fc2c  
 Sample ID : Fc2c  
 Data Filename: Fc2c\_003.lcd  
 Method Filename: B\_95\_D\_5\_10min\_0\_2mLmin.lcm  
 Batch Filename: 01042024.lcb  
 Vial #: 1-89  
 Injection Volume : 1 uL  
 Date Acquired : 4/2/2024 1:35:16 PM  
 Date Processed : 4/2/2024 2:29:14 PM  
 Sample Type : Unknown  
 Acquired by : System Administrator  
 Processed by : System Administrator

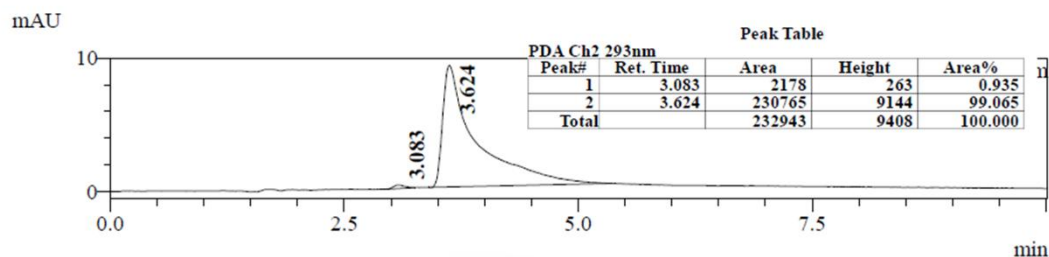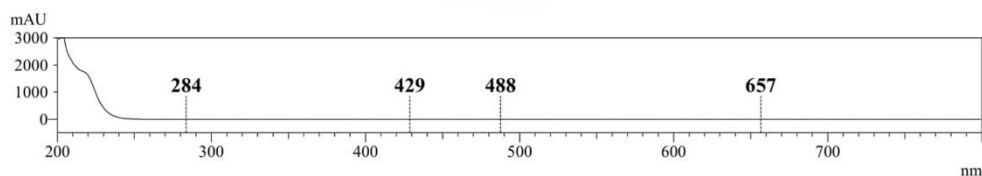

**Figure S2ah:** RP-HPLC-MS of **2c**; HPLC purity 99%; UV-vis spectrum shown at Rt = 3.634 min.

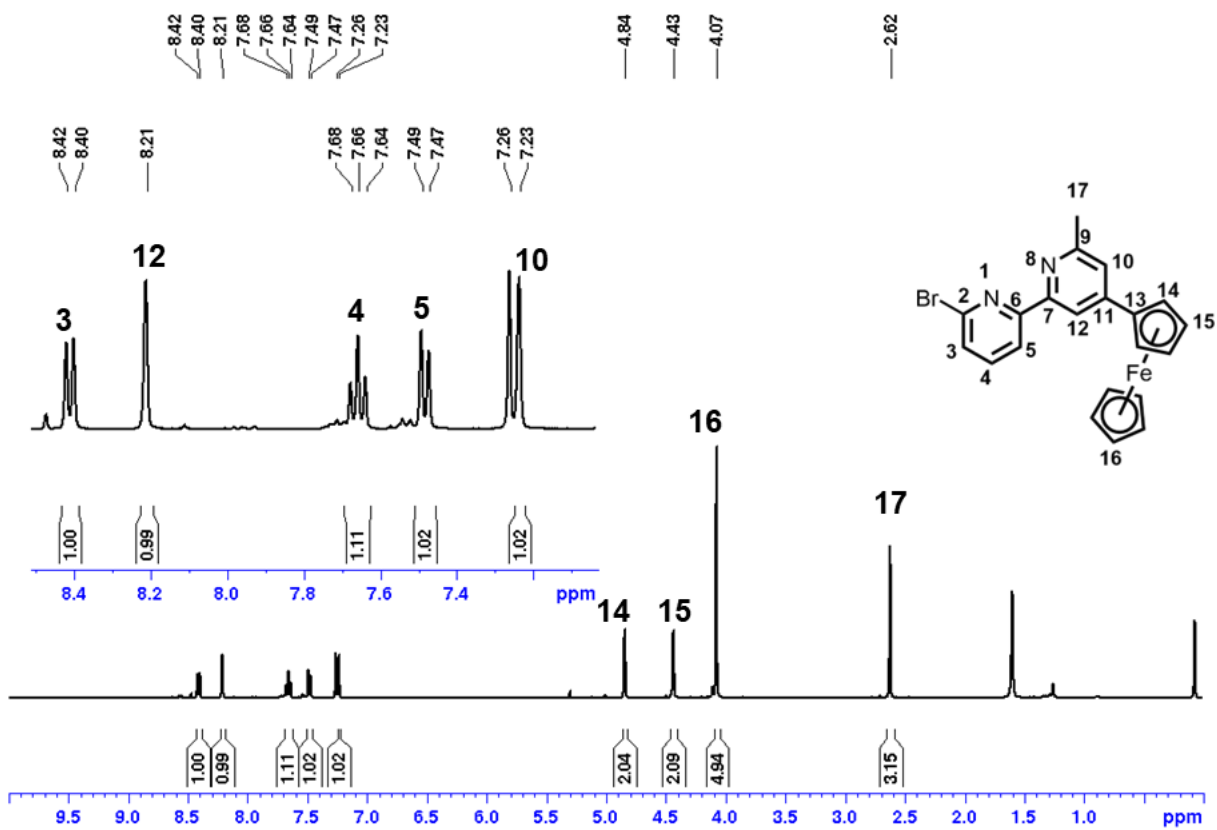

Figure S2ai:  $^1\text{H NMR}$  (CDCl<sub>3</sub>, 400 MHz) spectrum of **2d**.

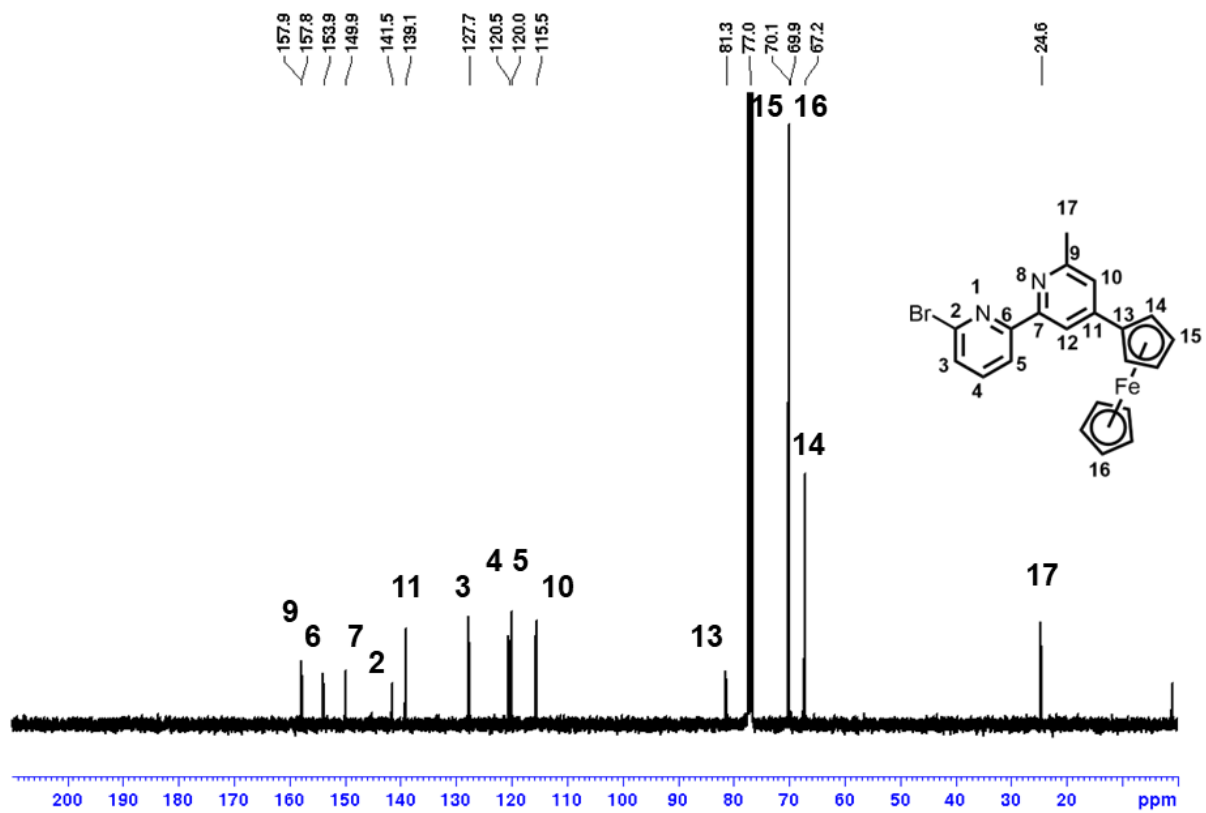

Figure S2aj:  $^{13}\text{C}\{^1\text{H}\}$  NMR (101 MHz, CDCl<sub>3</sub>) spectrum of **2d**.

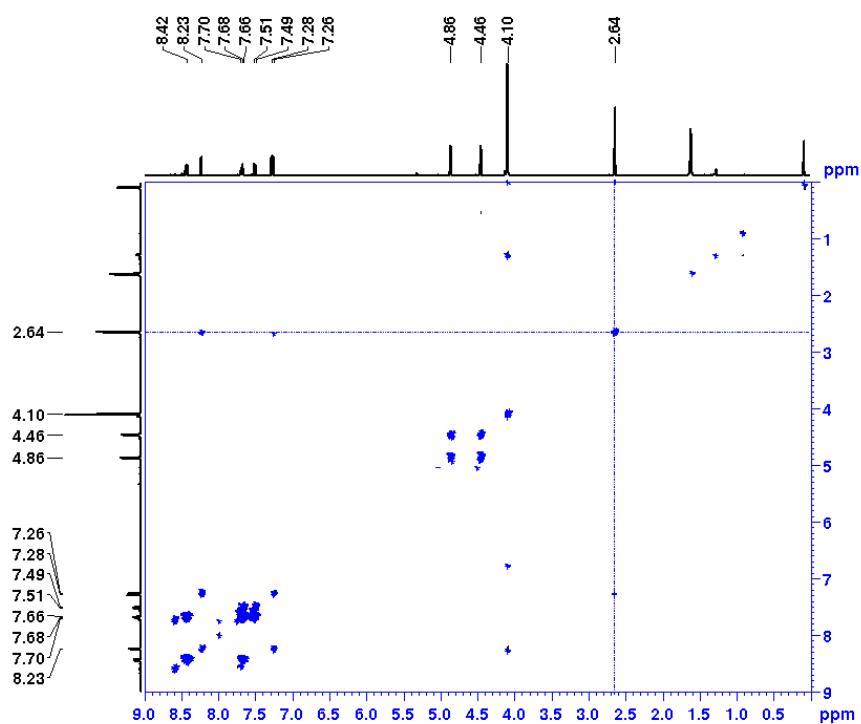

**Figure S2ak:**  $^1\text{H}$ - $^1\text{H}$  correlation spectrum of **2d** (400 MHz,  $\text{CDCl}_3$ ); shows the correlation between methyl and aromatic protons.

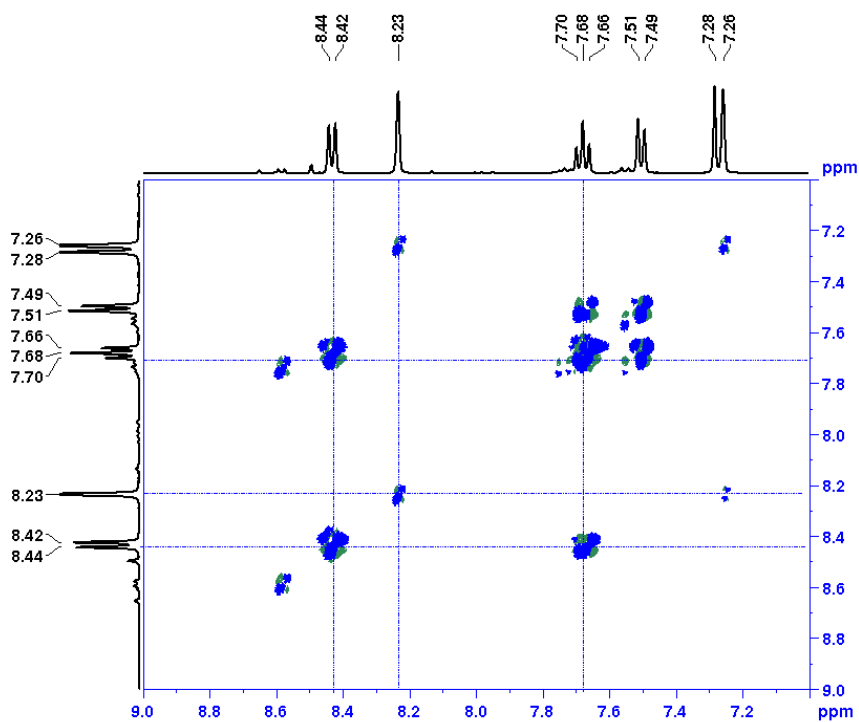

**Figure S2al:**  $^1\text{H}$ - $^1\text{H}$  correlation spectrum of **2d**, showing the correlations amongst the aromatic protons.

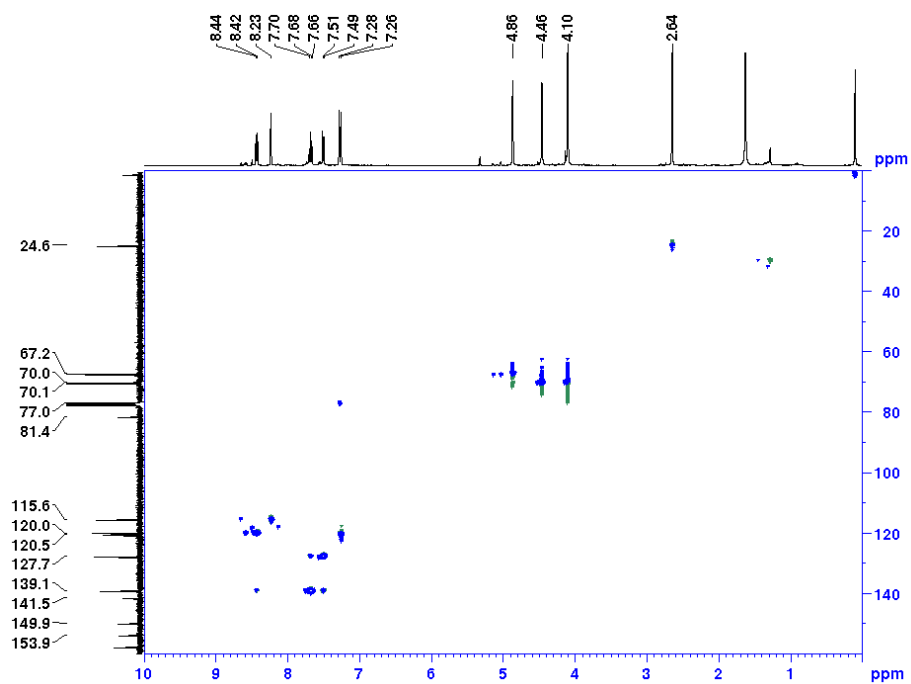

Figure S2am: HSQC spectrum of **2d** (400 MHz, CDCl<sub>3</sub>).

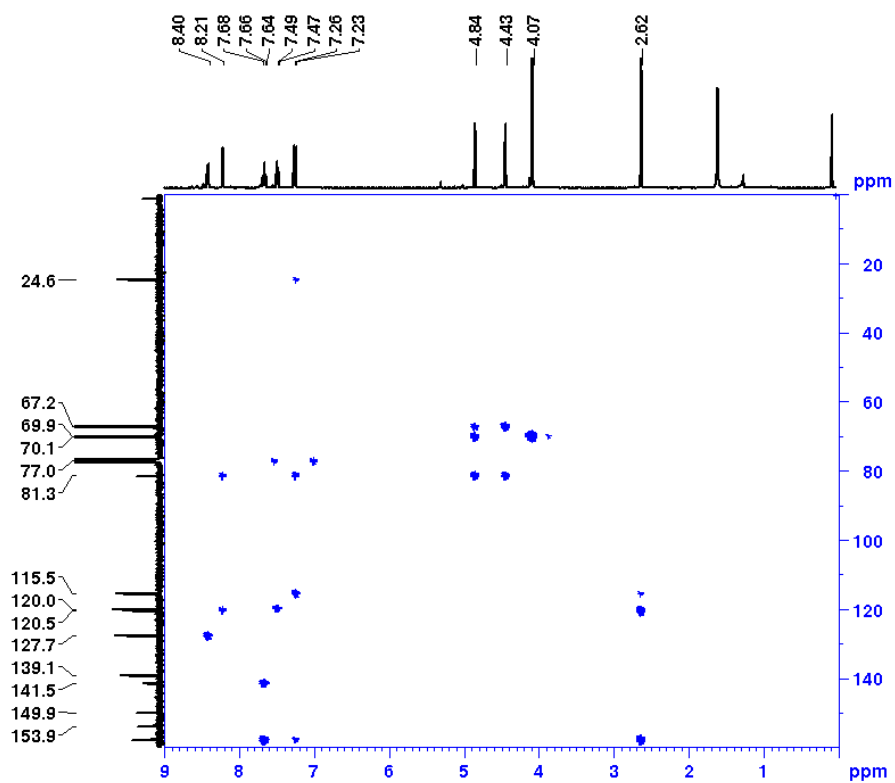

Figure S2an: HMBC spectrum of **2d** (400 MHz, CDCl<sub>3</sub>).

Sample Name Fc2d Position p1b7 Instrument Name QTOF User Name LCMSQTOF-PC\admin  
 Inj Vol 1 InjPosition InjPosition SampleType Sample IRM Calibration Status Success  
 Data Filename Fc2d.d ACQ Method direct mass\_+veESI.m Comment Acquired Time 12/11/2023 5:23:48 PM

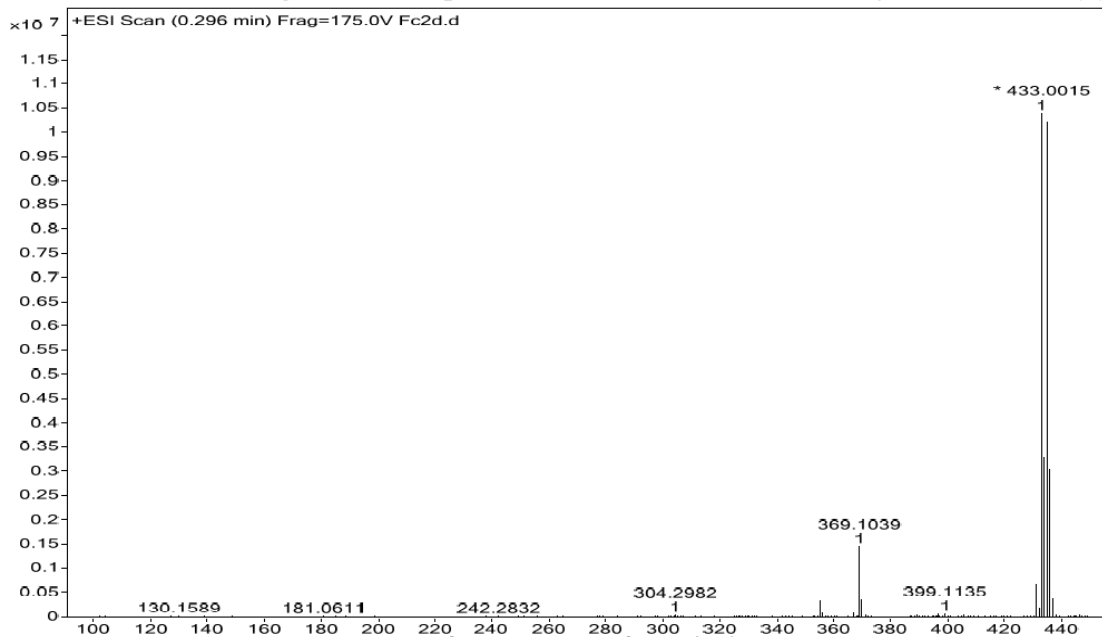

**Figure S2ao:** HRMS spectrum of **2d** (M: C<sub>21</sub>H<sub>17</sub>BrFeN<sub>2</sub>) *m/z* calcd for [M+H<sup>+</sup>] 433.0044, *m/z* found for [M+H<sup>+</sup>] 433.0015.

SHIMADZU LabSolutions Analysis Report

<Sample Information>

Sample Name : Fc2d  
 Sample ID : Fc2d  
 Data Filename : Fc2d\_Fc2d\_2.lcd  
 Method Filename : B\_95\_D\_5\_10min\_0\_2mLmin.lcm  
 Batch Filename : 28102024.lcb  
 Vial # : 1-95  
 Injection Volume : 10 uL  
 Date Acquired : 10/28/2024 11:39:42 AM  
 Date Processed : 10/28/2024 11:49:47 AM  
 Sample Type : Unknown  
 Acquired by : System Administrator  
 Processed by : System Administrator

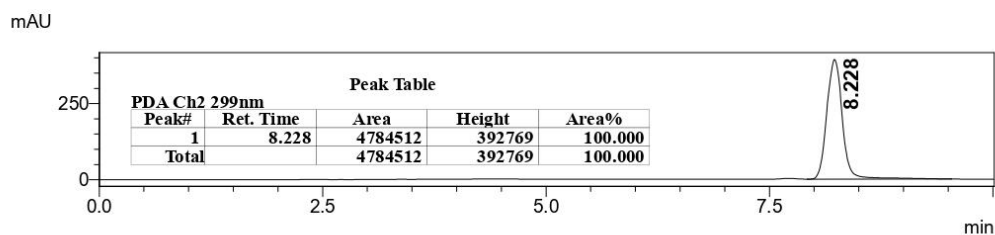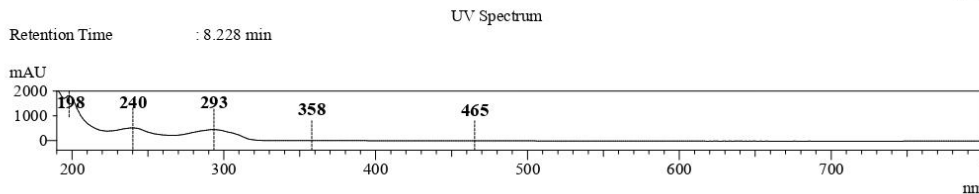

**Figure S2ap:** RP-HPLC-MS of **2d**; HPLC purity 100%; UV-vis spectrum shown at Rt = 8.228 min.

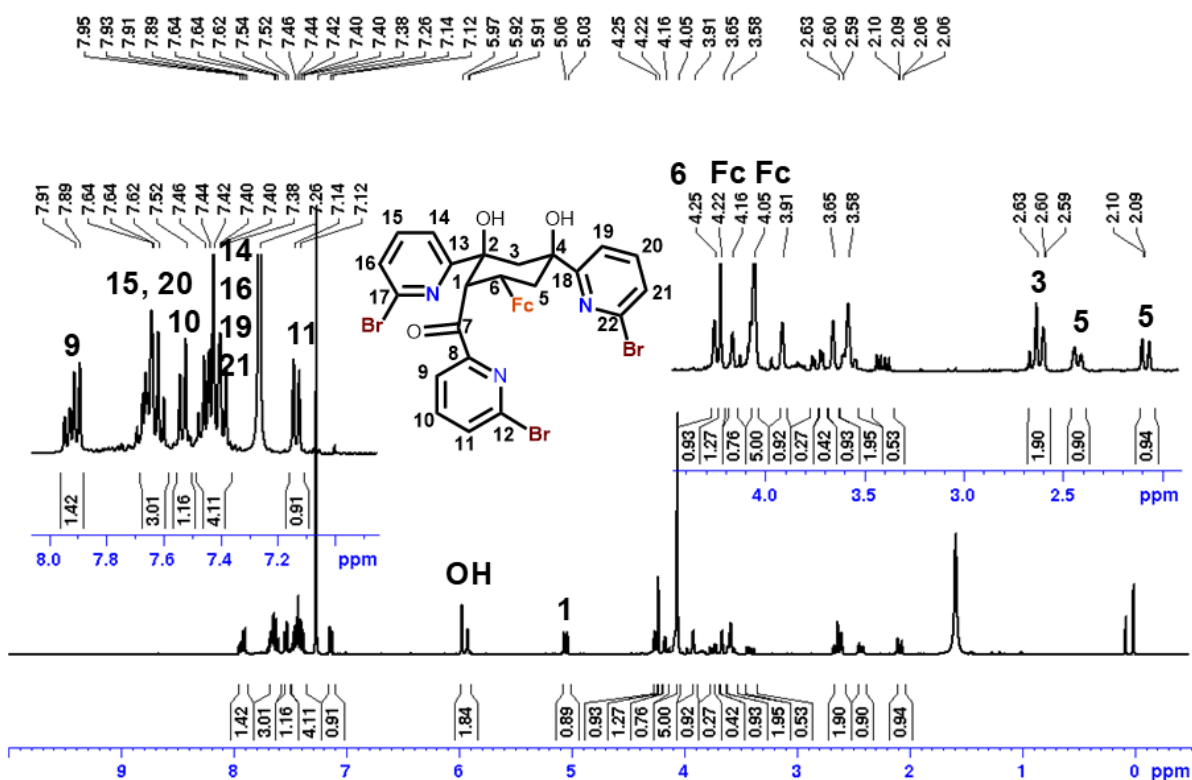

Figure S2aq:  $^1\text{H}$  NMR (400 MHz,  $\text{CDCl}_3$ ) spectrum of by-product **2d'**.

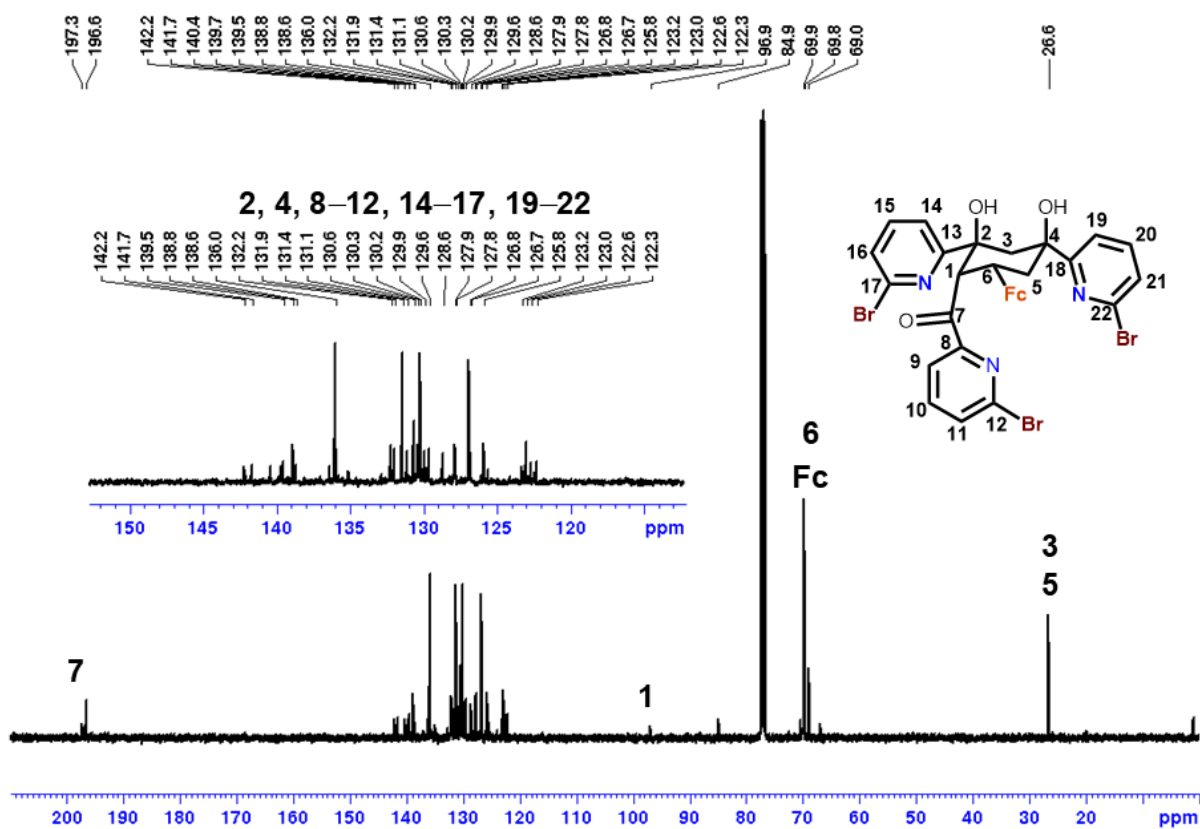

Figure S2ar:  $^{13}\text{C}\{^1\text{H}\}$  NMR (101 MHz,  $\text{CDCl}_3$ ) spectrum of by-product **2d'**.

**Acquisition Parameter**

|             |          |                       |           |                  |           |
|-------------|----------|-----------------------|-----------|------------------|-----------|
| Source Type | ESI      | Ion Polarity          | Positive  | Set Nebulizer    | 1.2 Bar   |
| Focus       | Active   | Set Capillary         | 4500 V    | Set Dry Heater   | 200 °C    |
| Scan Begin  | 50 m/z   | Set End Plate Offset  | -500 V    | Set Dry Gas      | 6.0 l/min |
| Scan End    | 3000 m/z | Set Collision Cell RF | 130.0 Vpp | Set Divert Valve | Waste     |

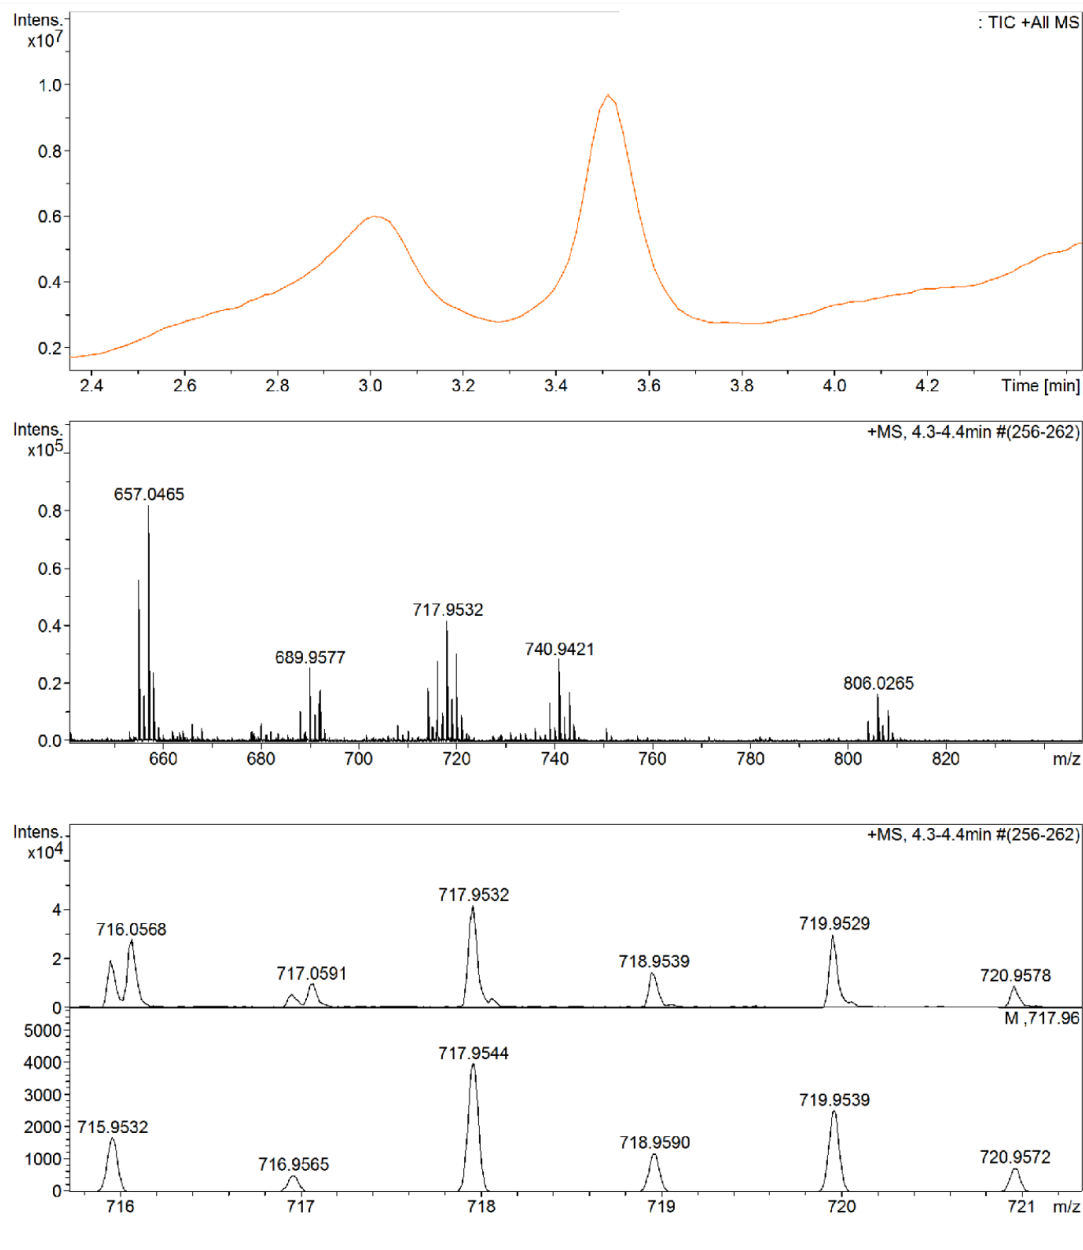

**Figure S2as:** HRMS spectrum of **2d'** (M: C<sub>32</sub>H<sub>26</sub>Br<sub>3</sub>FeN<sub>3</sub>O<sub>3</sub>) *m/z* calcd for [M-Br+Na<sup>+</sup>] 740.9635, *m/z* found for [M-Br+Na<sup>+</sup>] 740.9421; *m/z* calcd for [M-Br<sup>+</sup>] 717.9737, *m/z* found for [M-Br<sup>+</sup>] 717.9544.

<Sample Information>

Sample Name : 2d'  
 Sample ID : 2d'  
 Data Filename : 2d'\_229\_2.lcd  
 Method Filename : B\_95\_D\_5\_10min\_0\_2mLmin.lcm  
 Batch Filename : 10082025.Tcb  
 Vial # : 1-95  
 Injection Volume : 10 uL  
 Date Acquired : 08/10/2025 11:39:42 AM  
 Date Processed : 08/10/2025 11:49:47 AM

Sample Type : Unknown  
 Acquired by : System Administrator  
 Processed by : System Administrator

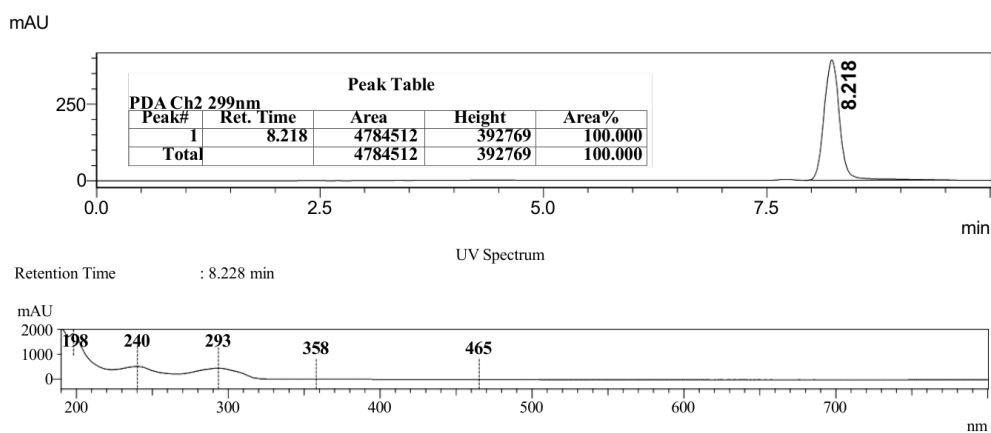

**Figure S2at:** RP-HPLC-MS of **2d'**; HPLC purity 80%; UV-vis spectrum shown at  $R_t = 8.218$  min.

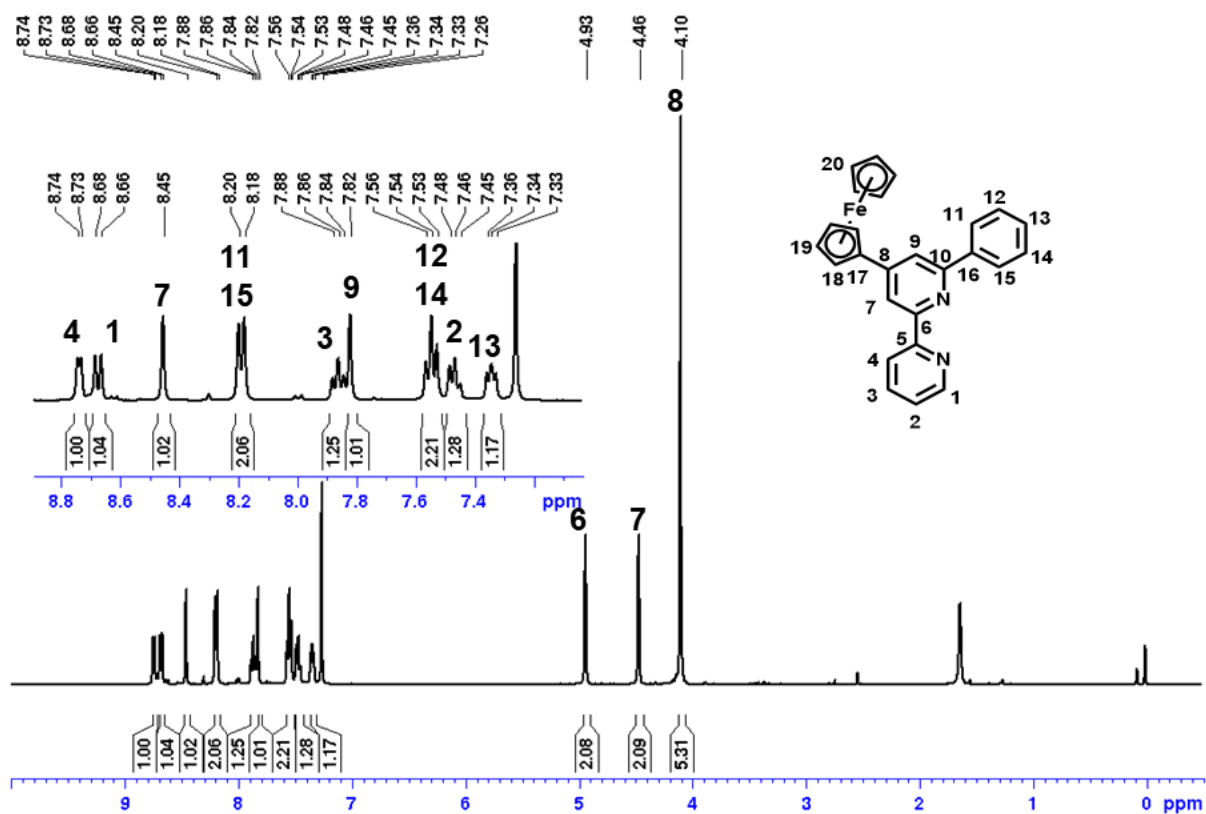

**Figure S2au:**  $^1\text{H}$  NMR (400 MHz,  $\text{CDCl}_3$ ) spectrum of ligand **2e**.

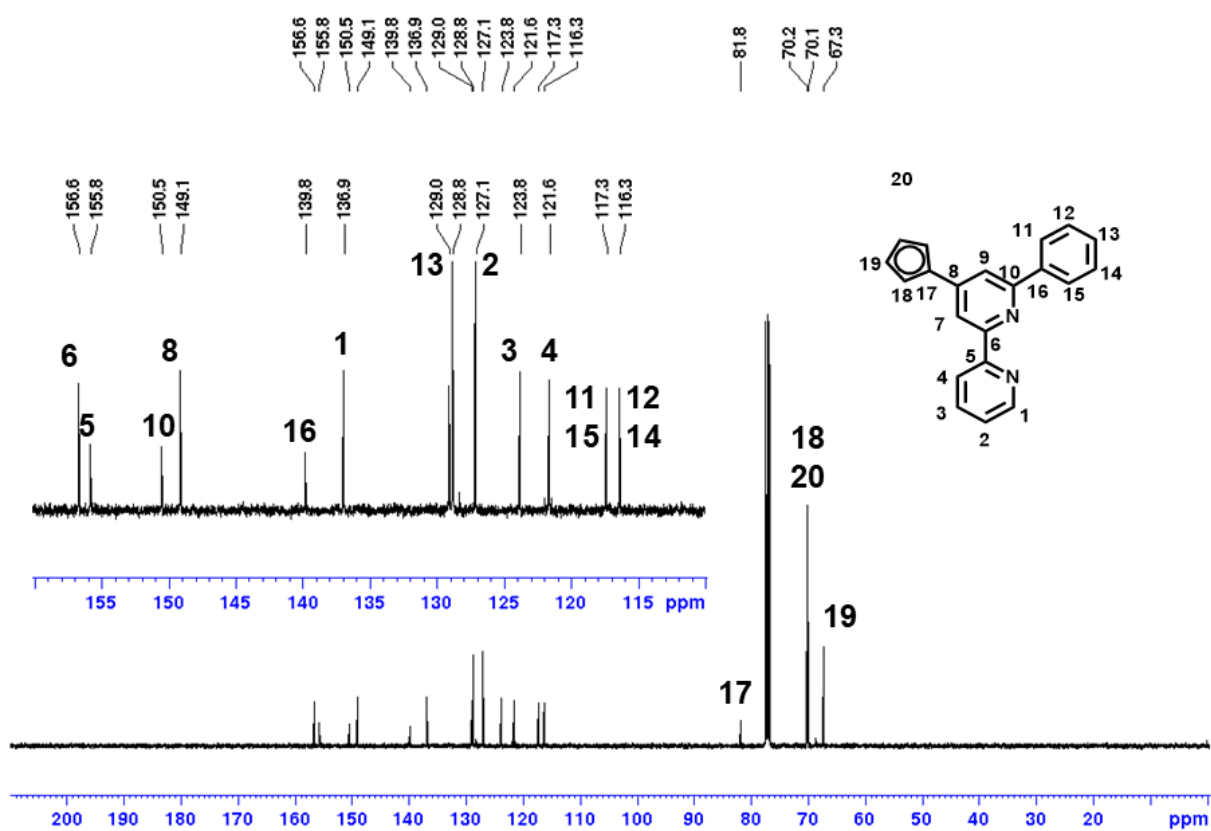

**Figure S2av:**  $^{13}\text{C}\{^1\text{H}\}$  NMR (101 MHz,  $\text{CDCl}_3$ ) spectrum of ligand **2e**.

PD-AM-L6 (0.045) Is (0.00,0.10) C26H21FeN2

1: TOF MS ES+  
6.87e12

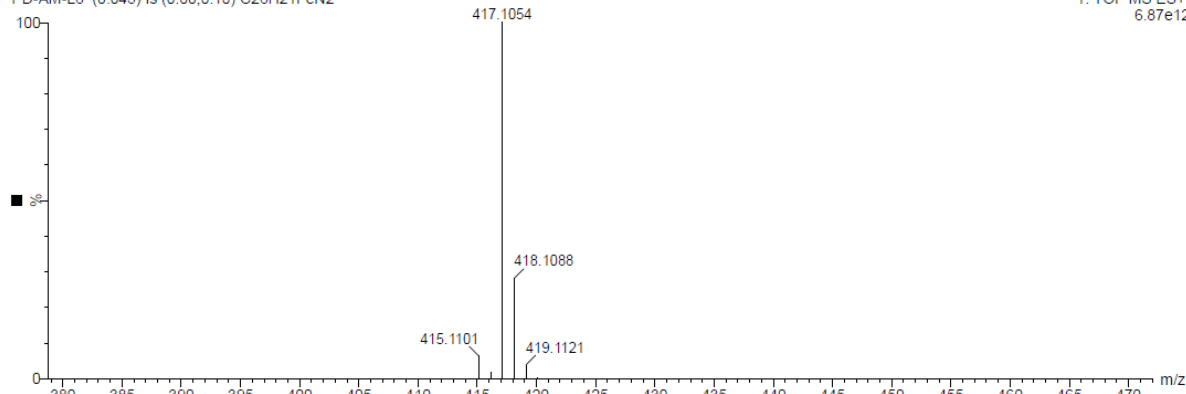

PD-AM-L6 3 (0.079) AM2 (Ar,22000.0,556.28,0.00,LS 10); Cm (1:8)

1: TOF MS ES+  
1.43e7

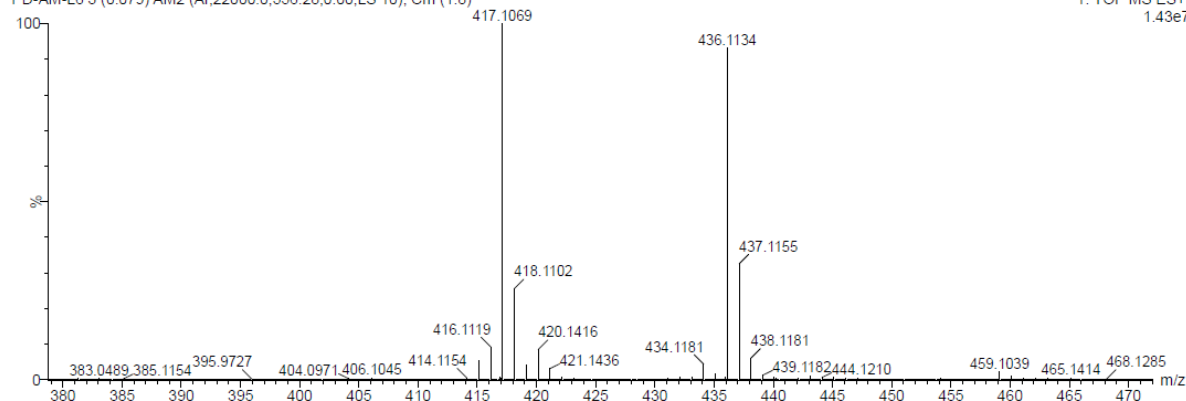

**Figure S2aw:** HRMS spectrum of **2e** (M: C<sub>26</sub>H<sub>20</sub>FeN<sub>2</sub>) *m/z* calcd for [M+H<sup>+</sup>] 417.1095, *m/z* found for [M+H<sup>+</sup>] 417.1069.

**SHIMADZU LabSolutions Analysis Report**

**<Sample Information>**

|                  |                              |              |                        |
|------------------|------------------------------|--------------|------------------------|
| Sample Name      | : SS-SB-210                  | Sample Type  | : Unknown              |
| Sample ID        | : SS-SB-210                  | Acquired by  | : System Administrator |
| Data Filename    | : SS-SB-210_SS-SB-210_10.lcd | Processed by | : System Administrator |
| Method Filename  | : C_95_10min_0_2mLmin.lcm    |              |                        |
| Batch Filename   | : 25122024.lcb               |              |                        |
| Vial #           | : 1-92                       |              |                        |
| Injection Volume | : 5 uL                       |              |                        |
| Date Acquired    | : 12/25/2024 6:30:16 PM      |              |                        |
| Date Processed   | : 12/25/2024 6:40:22 PM      |              |                        |

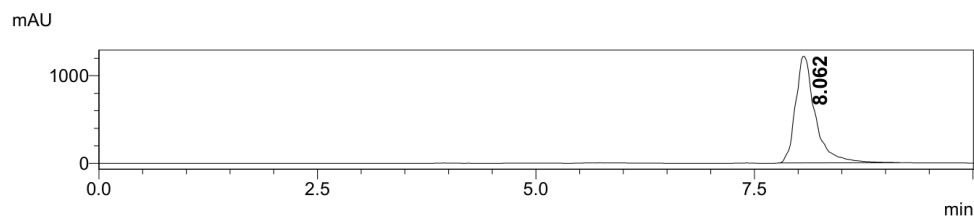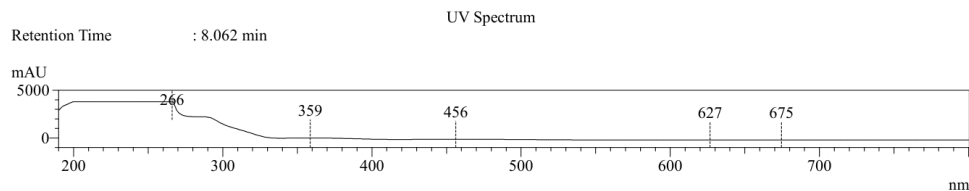

**Figure S2ax:** RP-HPLC-MS of **2e**; HPLC purity 100%; UV-vis spectrum shown at Rt = 8.062 min.

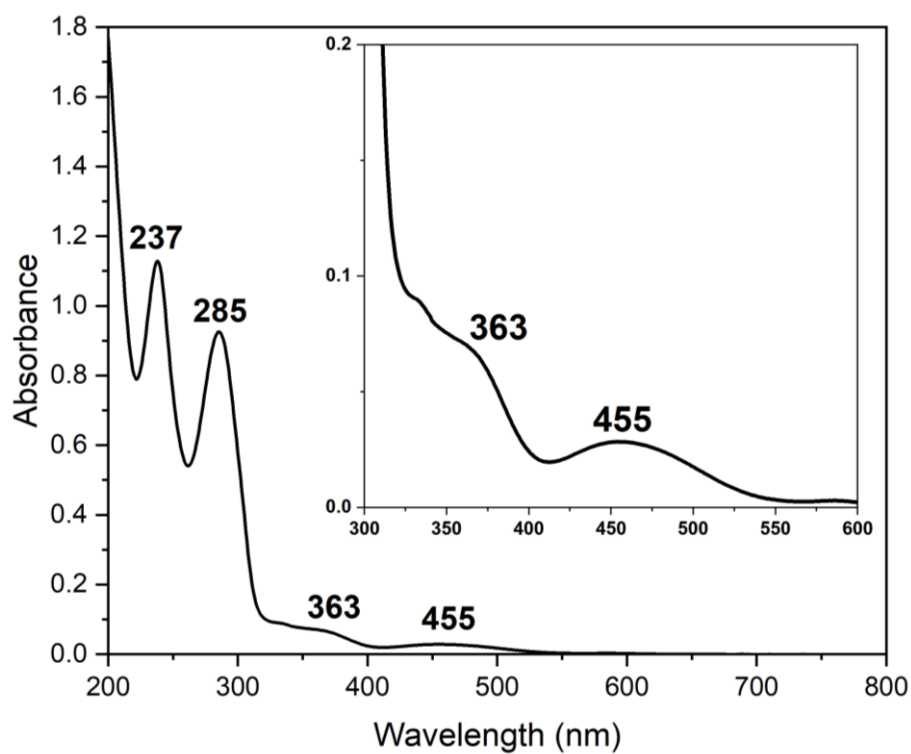

**Figure S2ay:** Absorbance spectrum of **2a** (0.1  $\mu$ M) in acetonitrile; inset shows the zoomed region of 300–600 nm.

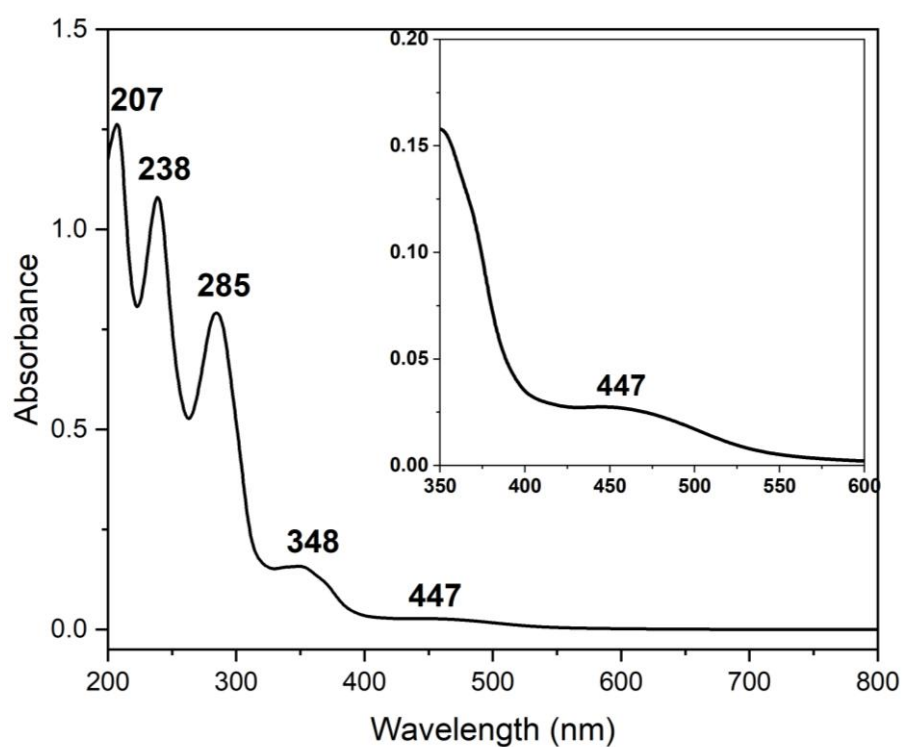

**Figure S2az:** Absorbance spectrum of **2b** (0.1  $\mu$ M) in acetonitrile; inset shows the zoomed region of 350–600 nm.

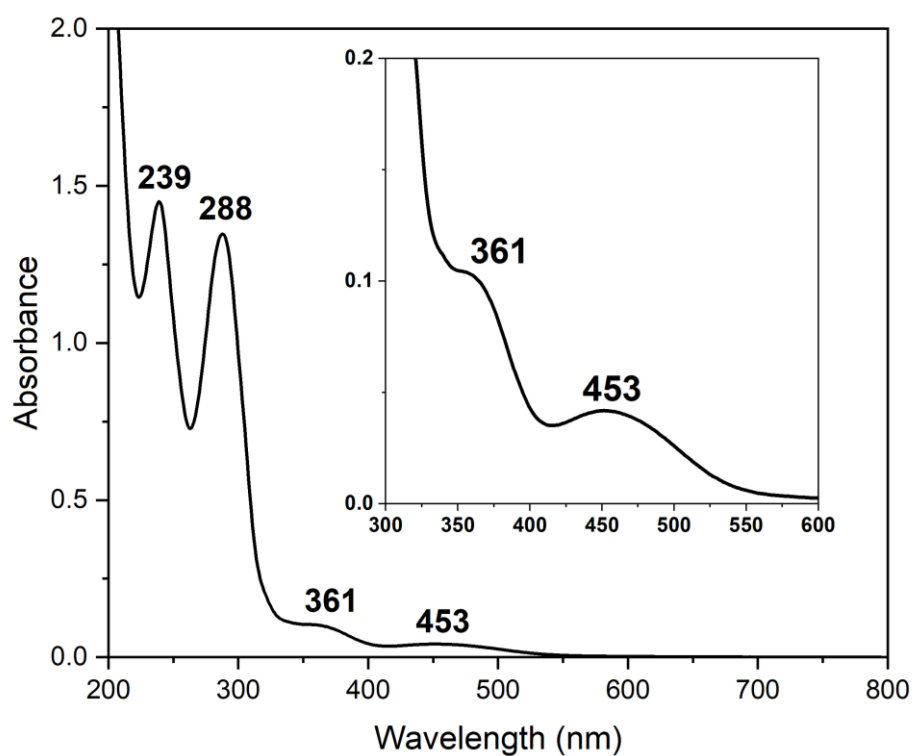

**Figure S2ba:** Absorbance spectrum of **2c** (0.1  $\mu$ M) in acetonitrile; inset shows the zoomed region of 300–600 nm.

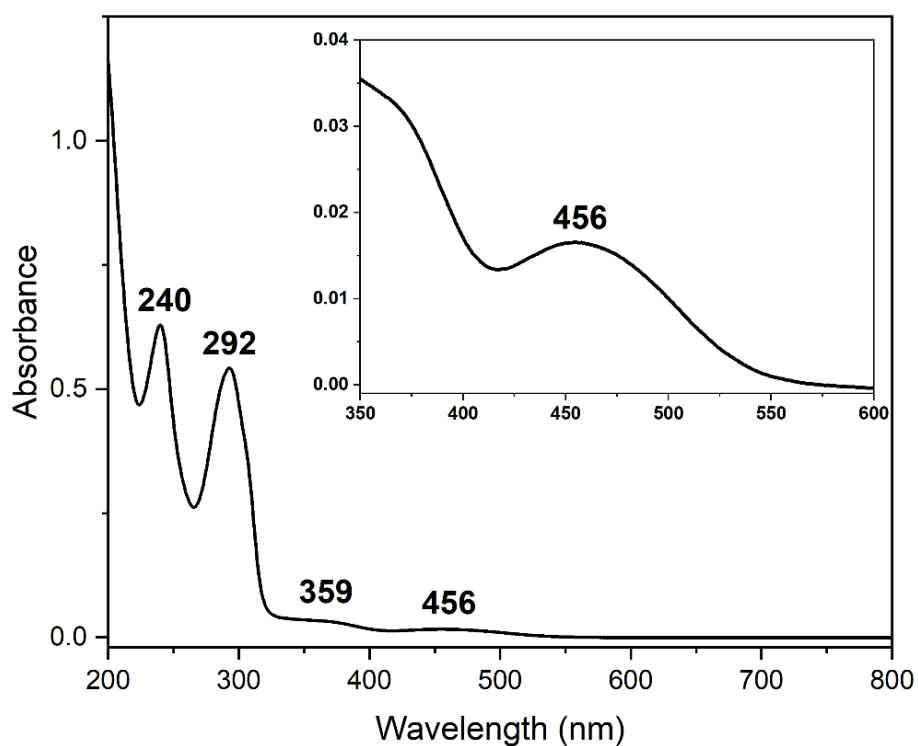

**Figure S2bb:** Absorbance spectrum of **2d** (0.1  $\mu$ M) in acetonitrile; inset shows the zoomed region of 350–600 nm.

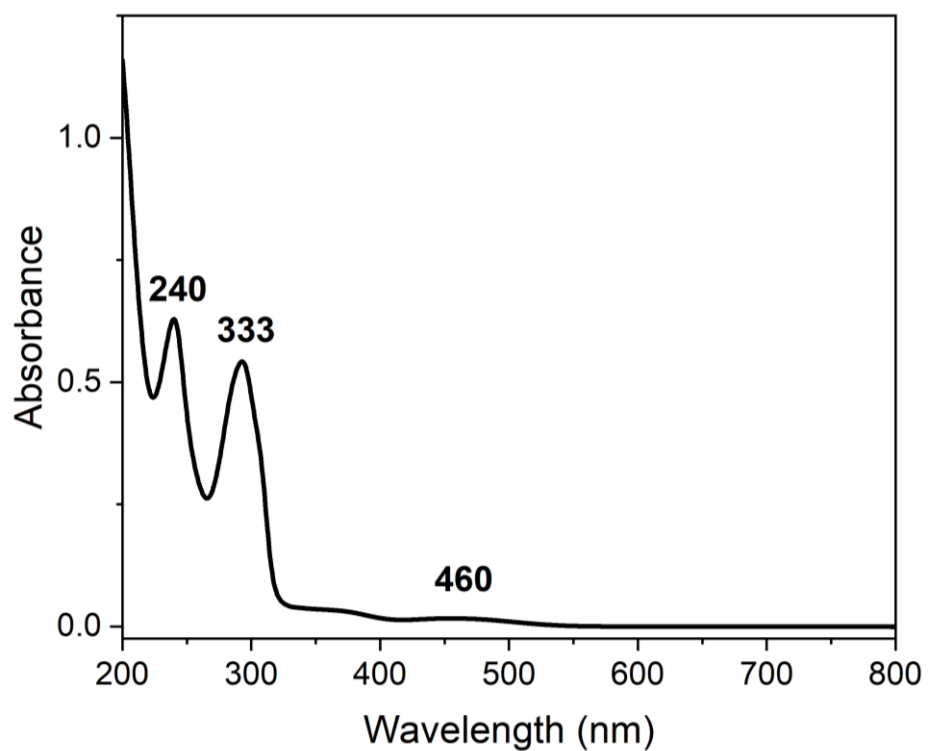

**Figure S2bc:** Absorbance spectrum of **2d'** (0.1 μM) in acetonitrile.

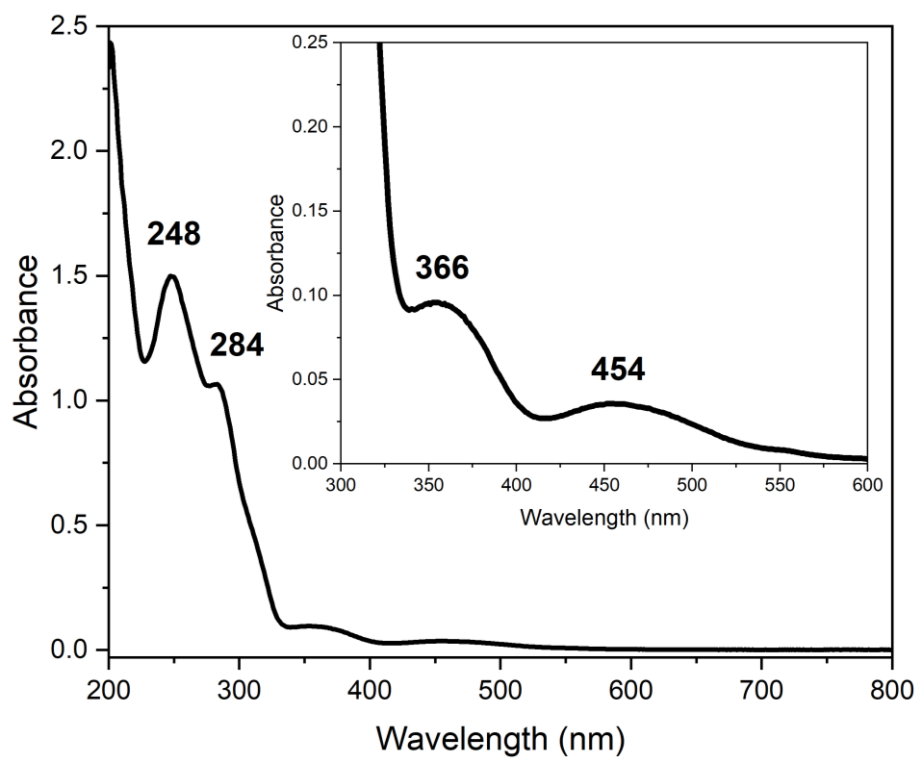

**Figure S2bd:** Absorbance spectrum of **2e** (0.1 μM) in acetonitrile; inset shows the zoomed region of 300–600 nm.

Characterisation of complexes

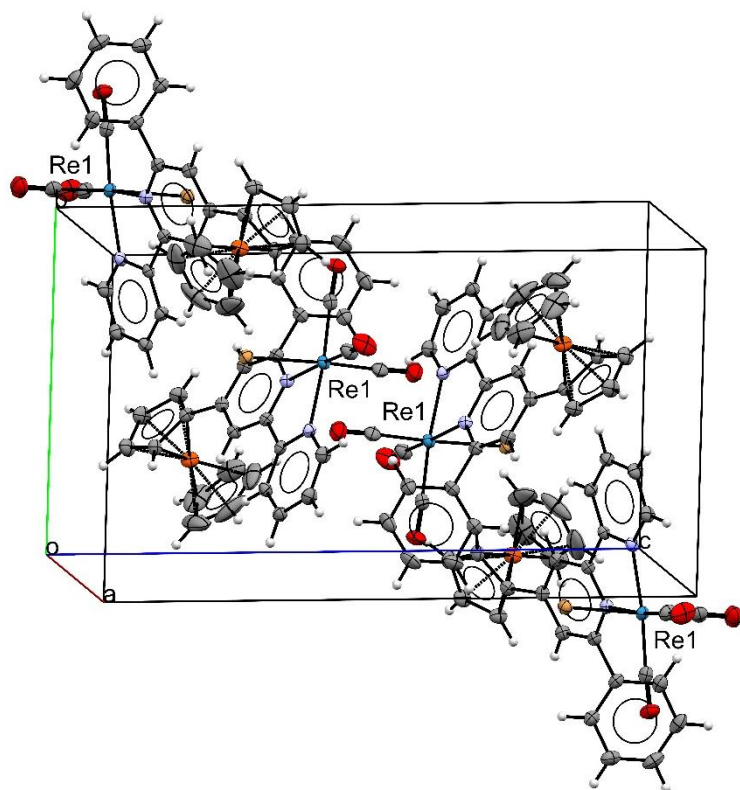

**Figure S3a:** 3e in the lattice unit cell.

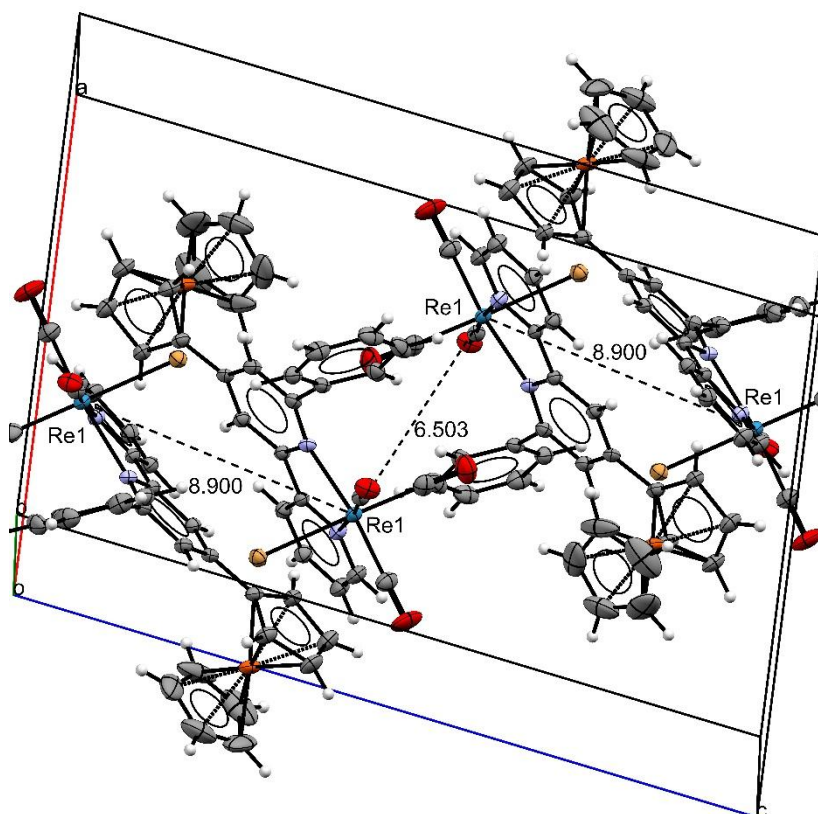

**Figure S3b:** The weak interactions shown between the Re(I) centers in the unit cell of 3e.

**Table S4:** Crystal data and structure refinement of **3e**.

| Identification code                         | <b>3e</b>                                                            |
|---------------------------------------------|----------------------------------------------------------------------|
| CCDC deposition number                      | 2443100                                                              |
| Empirical formula                           | C <sub>29</sub> H <sub>20</sub> FeN <sub>2</sub> O <sub>3</sub> ReBr |
| Formula weight                              | 766.449                                                              |
| Temperature/K                               | 140.00                                                               |
| Crystal system                              | monoclinic                                                           |
| Space group                                 | P2 <sub>1</sub> /n                                                   |
| a/Å                                         | 12.7797(11)                                                          |
| b/Å                                         | 10.8637(8)                                                           |
| c/Å                                         | 19.3382(15)                                                          |
| α/°                                         | 90                                                                   |
| β/°                                         | 99.810(3)                                                            |
| γ/°                                         | 90                                                                   |
| Volume/Å <sup>3</sup>                       | 2645.6(4)                                                            |
| Z                                           | 4                                                                    |
| ρ <sub>calc</sub> g/cm <sup>3</sup>         | 1.924                                                                |
| μ/mm <sup>-1</sup>                          | 6.664                                                                |
| F(000)                                      | 1471.2                                                               |
| Crystal size/mm <sup>3</sup>                | 0.2 × 0.1 × 0.05                                                     |
| Radiation                                   | Mo Kα (λ = 0.71073)                                                  |
| 2θ range for data collection/°              | 4.28 to 59.14                                                        |
| Index ranges                                | -17 ≤ h ≤ 17, -15 ≤ k ≤ 15,<br>-26 ≤ l ≤ 26                          |
| Reflections collected                       | 62962                                                                |
| Independent reflections                     | 7329 [R <sub>int</sub> = 0.0654,<br>R <sub>sigma</sub> = 0.0367]     |
| Data/restraints/parameters                  | 7329/0/334                                                           |
| Goodness-of-fit on F <sup>2</sup>           | 1.052                                                                |
| Final R indexes [I ≥ 2σ (I)]                | R <sub>1</sub> = 0.0228, wR <sub>2</sub> = 0.0542                    |
| Final R indexes [all data]                  | R <sub>1</sub> = 0.0275, wR <sub>2</sub> = 0.0579                    |
| Largest diff. peak/hole / e Å <sup>-3</sup> | 0.90/-1.26                                                           |

**Table S5:** Bond lengths and angles for **3e**.

| <b>Bond lengths for 3e</b> |             |                 |                |             |             |                 |                |
|----------------------------|-------------|-----------------|----------------|-------------|-------------|-----------------|----------------|
| <b>Atom</b>                | <b>Atom</b> | <b>Length/Å</b> |                | <b>Atom</b> | <b>Atom</b> | <b>Length/Å</b> |                |
| Re1                        | N1          | 2.2019(18)      |                | C8          | C14         | 1.481(3)        |                |
| Re1                        | N2          | 2.173(2)        |                | C4          | C9          | 1.478(3)        |                |
| Re1                        | C3          | 1.916(3)        |                | C14         | C15         | 1.393(3)        |                |
| Re1                        | C2          | 1.907(3)        |                | C13         | C12         | 1.377(3)        |                |
| Re1                        | C1          | 1.921(3)        |                | C4          | C5          | 1.384(3)        |                |
| Re1                        | Br1         | 2.6223(3)       |                | C6          | C20         | 1.462(3)        |                |
| N1                         | C8          | 1.363(3)        |                | Fe1         | C20         | 2.030(2)        |                |
| N1                         | C4          | 1.354(3)        |                | Fe1         | C25         | 2.031(3)        |                |
| N2                         | C9          | 1.353(3)        |                | C20         | C21         | 1.434(3)        |                |
| N2                         | C13         | 1.350(3)        |                | C25         | C26         | 1.379(6)        |                |
| <b>Bond angles for 3e</b>  |             |                 |                |             |             |                 |                |
| <b>Atom</b>                | <b>Atom</b> | <b>Atom</b>     | <b>Angle/°</b> | <b>Atom</b> | <b>Atom</b> | <b>Atom</b>     | <b>Angle/°</b> |
| N2                         | Re1         | N1              | 75.01(7)       | Br1         | Re1         | N1              | 82.45(5)       |
| C3                         | Re1         | N1              | 171.25(9)      | Br1         | Re1         | N2              | 80.39(5)       |
| C3                         | Re1         | N2              | 98.49(9)       | Br1         | Re1         | C3              | 90.76(9)       |
| C2                         | Re1         | N1              | 97.90(9)       | Br1         | Re1         | C2              | 176.84(7)      |
| C2                         | Re1         | N2              | 96.65(9)       | Br1         | Re1         | C1              | 95.46(7)       |
| C2                         | Re1         | C3              | 88.58(12)      | C20         | C6          | C5              | 122.8(2)       |
| C1                         | Re1         | N1              | 100.68(8)      | C6          | C20         | Fe1             | 124.87(16)     |
| C1                         | Re1         | N2              | 174.31(8)      | C6          | C20         | C21             | 126.6(2)       |
| C1                         | Re1         | C3              | 85.40(10)      | C6          | C20         | C24             | 125.8(2)       |
| C1                         | Re1         | C2              | 87.57(10)      | C7          | C6          | C20             | 120.8(2)       |

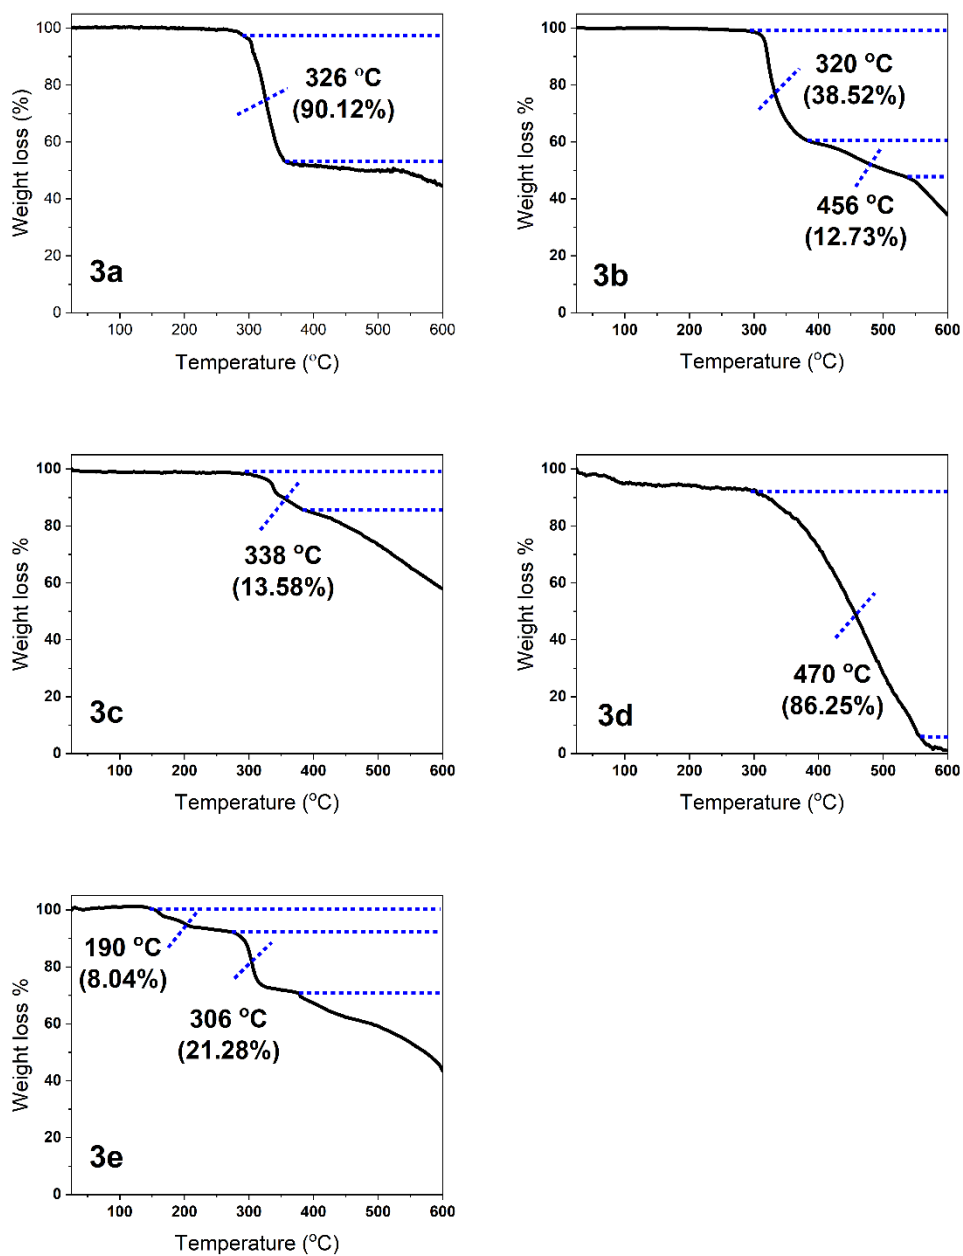

**Figure S3c:** Thermogravimetric profile of the rhenium complexes, measured from 25–600 °C, with a heating rate of 10K/min under N<sub>2</sub> flow.

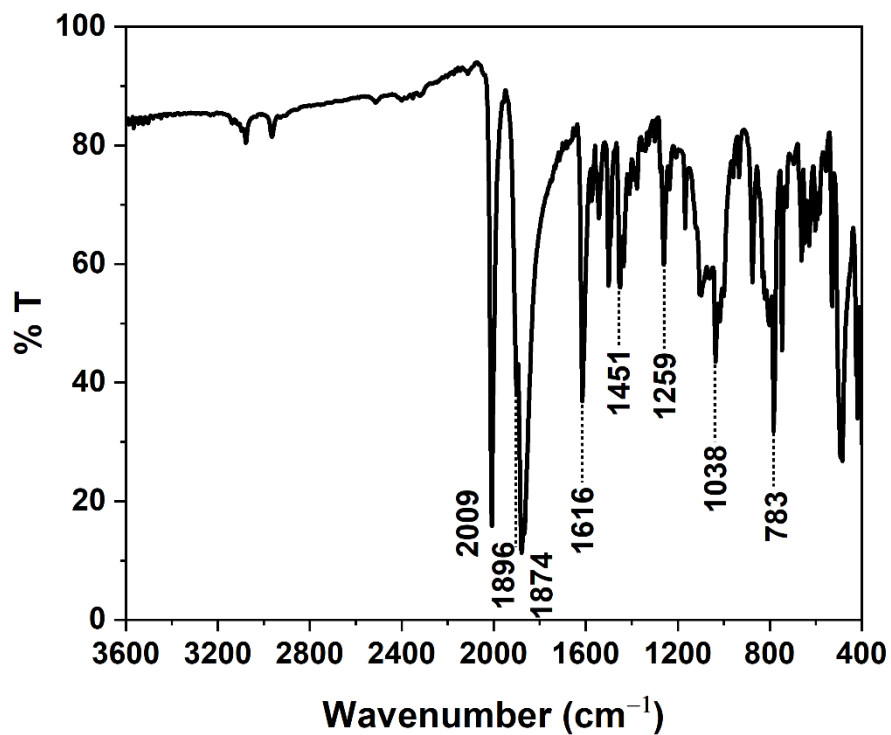

Figure S3d: ATR-IR spectrum of 3a.

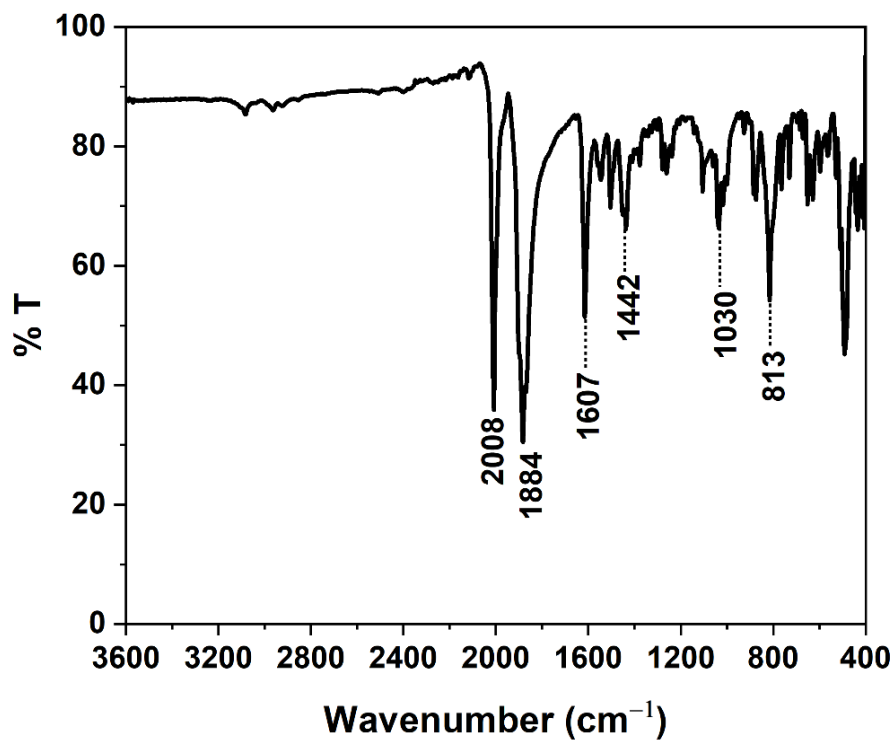

Figure S3e: ATR-IR spectrum of 3b.

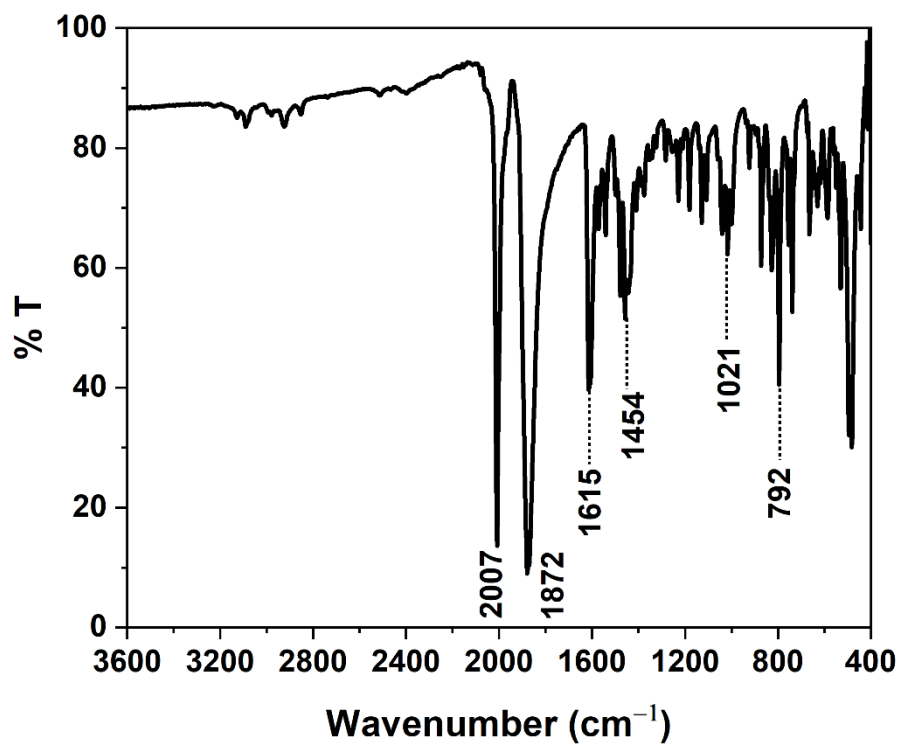

Figure S3f: ATR-IR spectrum of 3c.

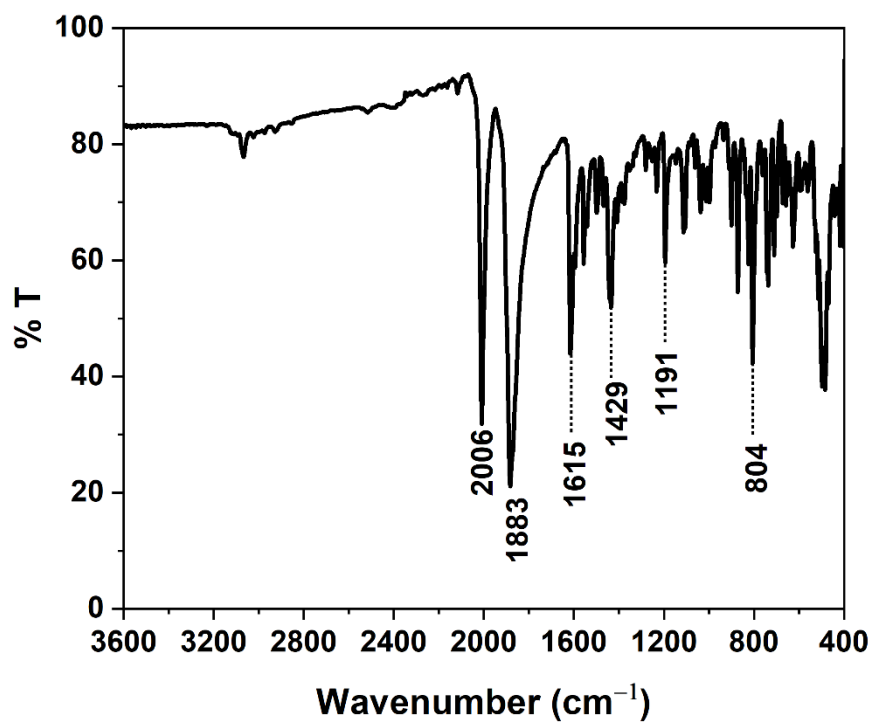

Figure S3g: ATR-IR spectrum of 3d.

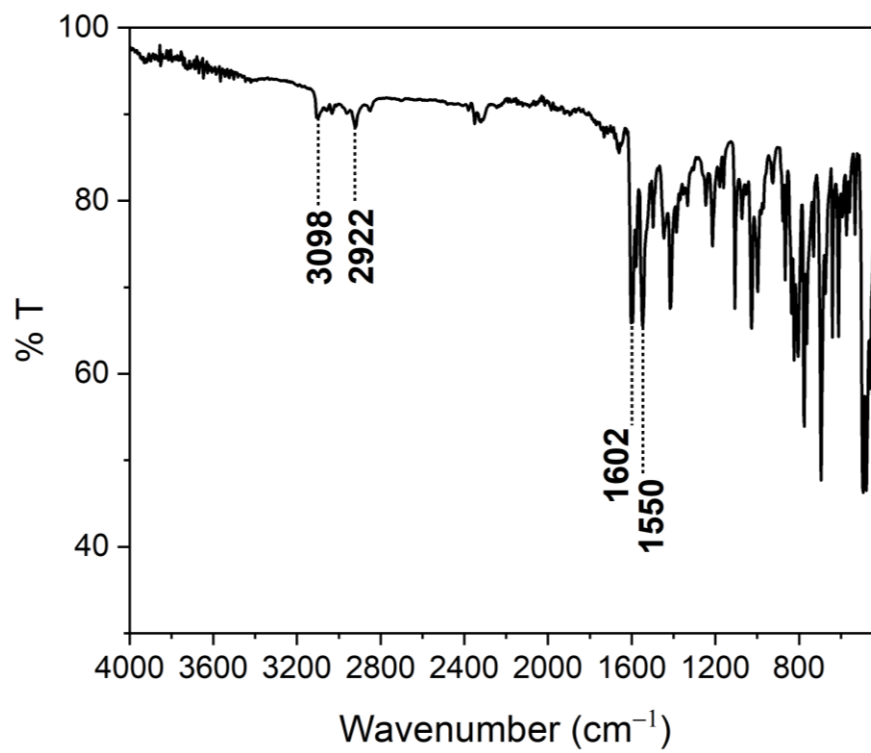

**Figure S3h:** ATR-IR spectrum of **3e**.

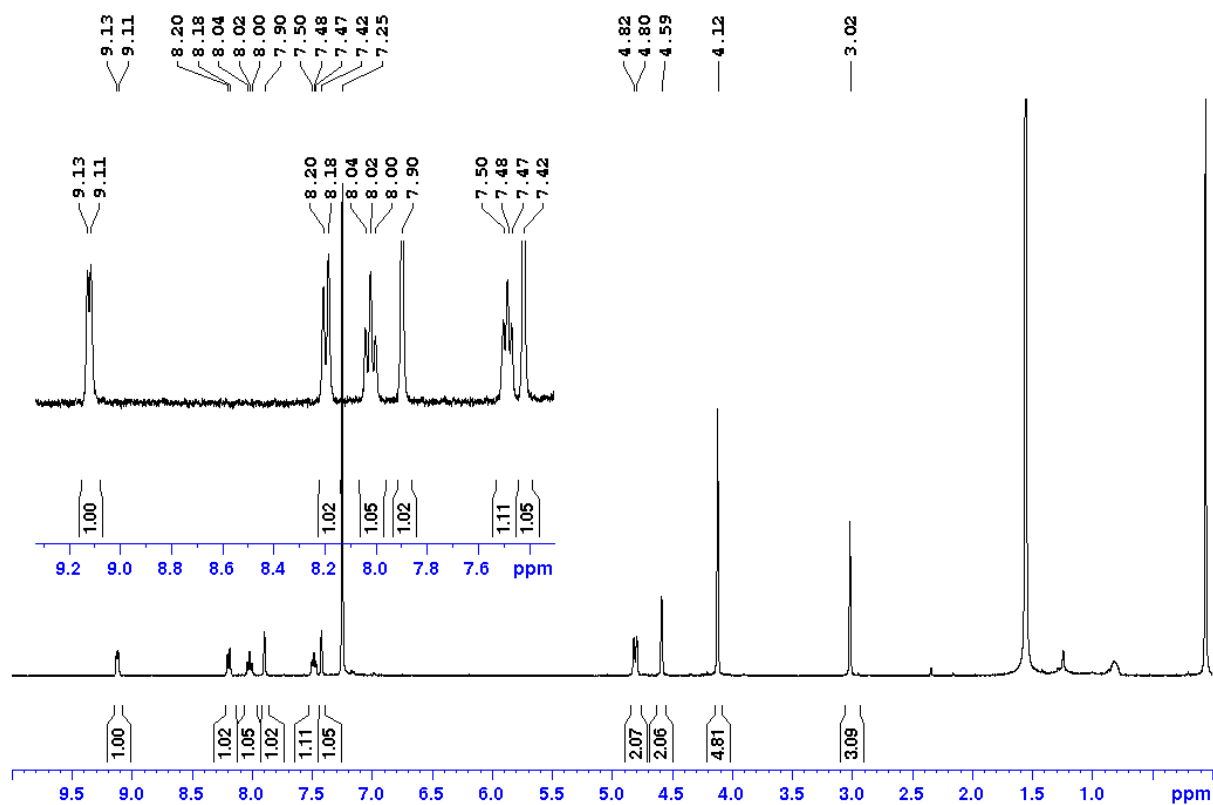

Figure S3i:  $^1\text{H}$  NMR ( $\text{CDCl}_3$ , 400 MHz) spectrum of **3a**.

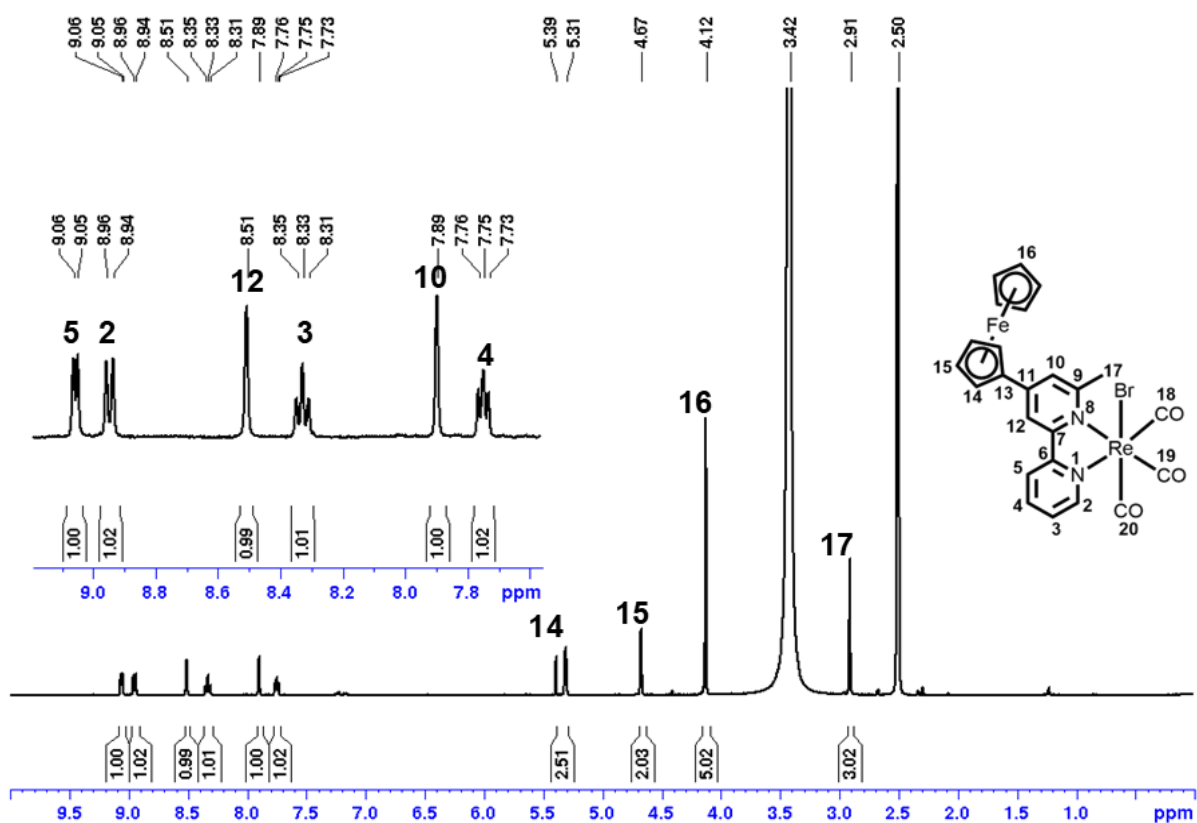

Figure S3j:  $^1\text{H}$  NMR ( $\text{DMSO-D}_6$ , 400 MHz) spectrum of **3a**.

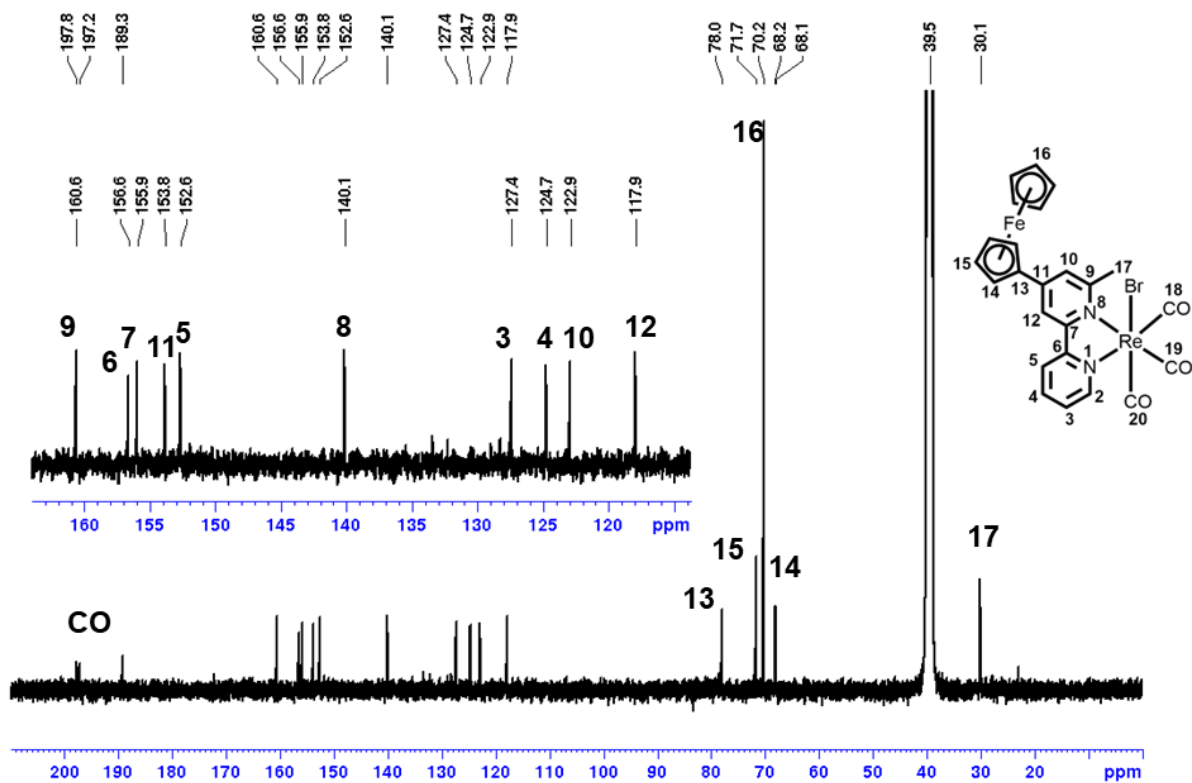

Figure S3k:  $^{13}\text{C}\{^1\text{H}\}$  NMR (101 MHz,  $\text{DMSO-D}_6$ ) spectrum of **3a**, with 13203 scans.

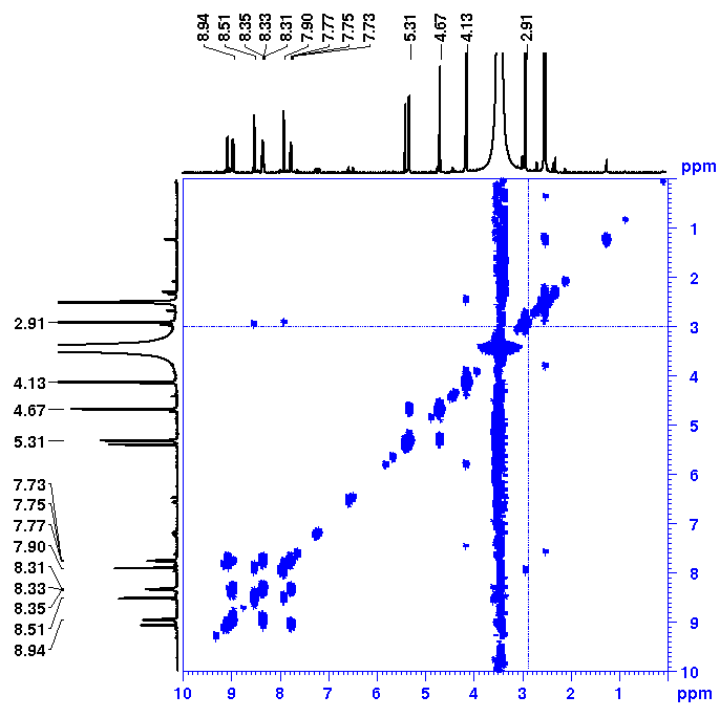

Figure S3l:  $^1\text{H}-^1\text{H}$  correlation spectrum of **3a** (400 MHz,  $\text{DMSO-D}_6$ ); shows the correlations between the methyl and aromatic protons.

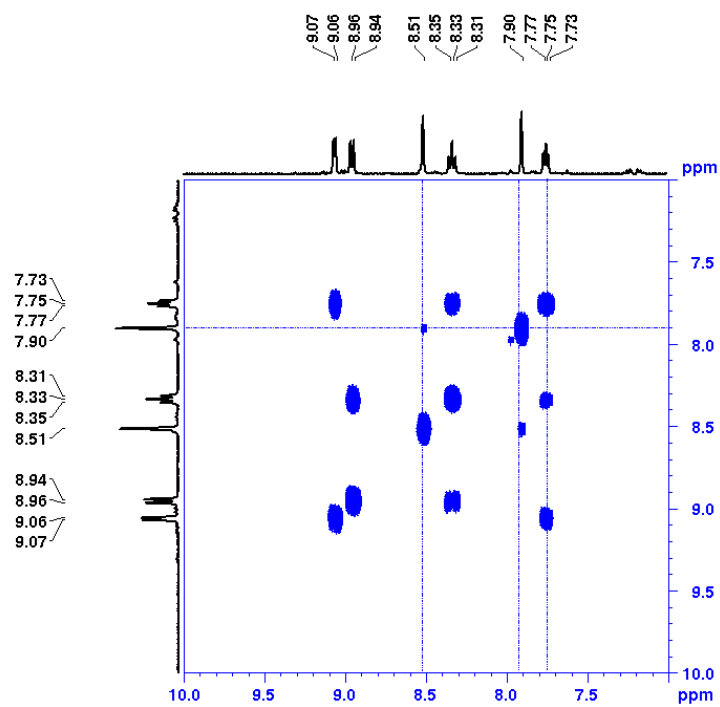

Figure S3m:  $^1\text{H}$ - $^1\text{H}$  correlation spectrum of **3a**, showing the correlations amongst the aromatic protons.

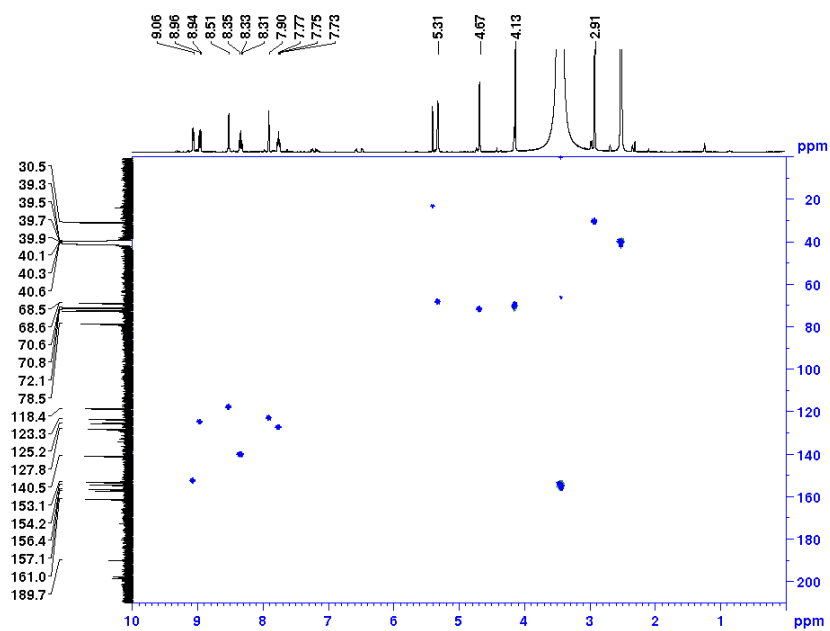

Figure S3n: HSQC spectrum of **3a** (400 MHz,  $\text{DMSO-D}_6$ ).

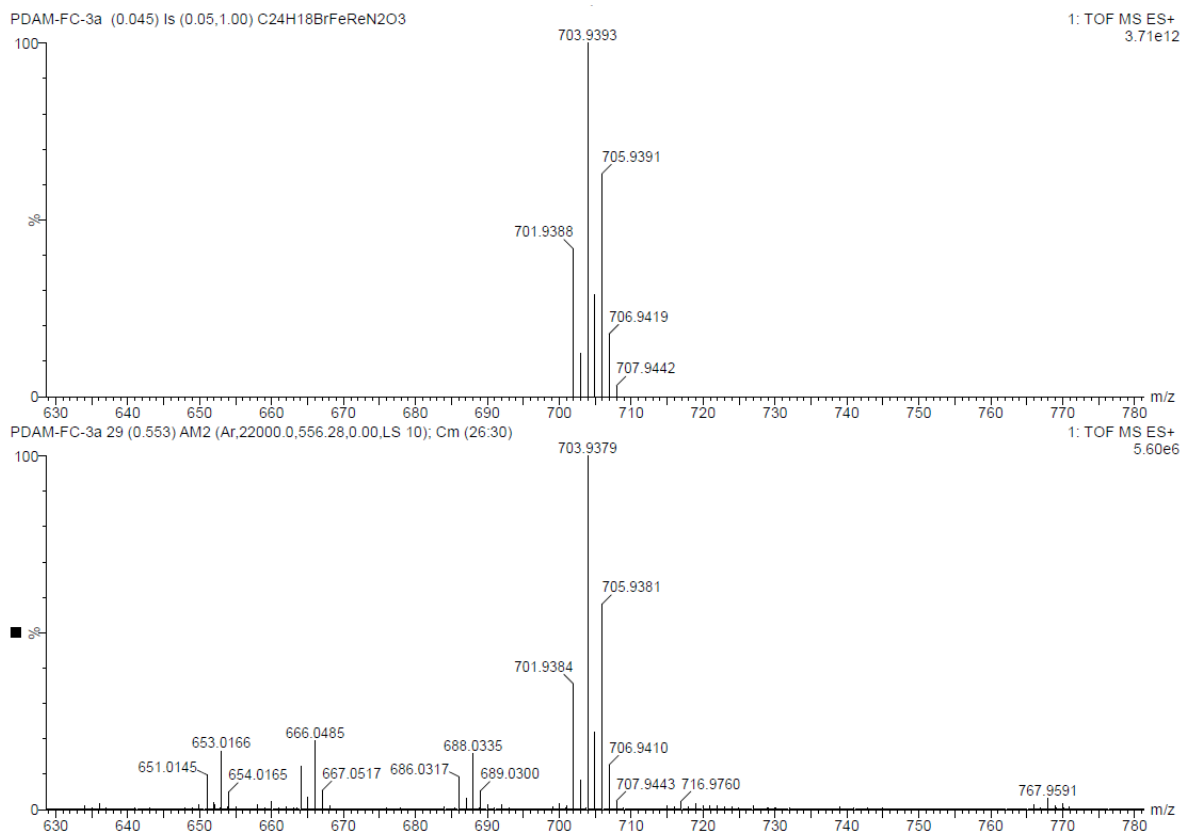

**Figure S3o:** HRMS spectrum of **3a** (M: C<sub>24</sub>H<sub>18</sub>BrFeN<sub>2</sub>O<sub>3</sub>Re) *m/z* calcd for [M<sup>+</sup>] 703.9426, *m/z* found [M<sup>+</sup>] 703.9379.

**SHIMADZU LabSolutions Analysis Report**

**<Sample Information>**

Sample Name : Fc3a  
 Sample ID : Fc3a  
 Data Filename : Fc3a\_Fc3a\_4.lcd  
 Method Filename : B\_95\_D\_5\_10min\_0\_2mLmin.lcm  
 Batch Filename : 28102024.lcb  
 Vial # : 1-96  
 Injection Volume : 10 uL  
 Date Acquired : 10/28/2024 11:56:25 AM  
 Date Processed : 10/28/2024 12:06:14 PM  
 Sample Type : Unknown  
 Acquired by : System Administrator  
 Processed by : System Administrator

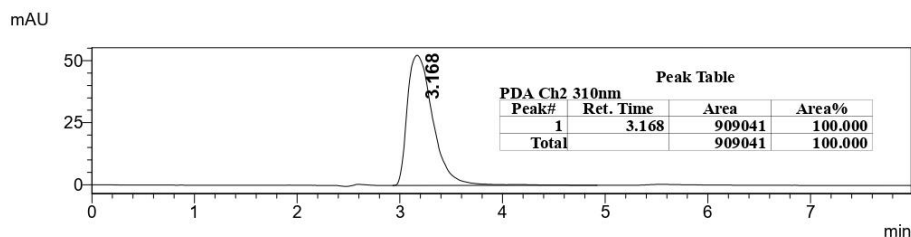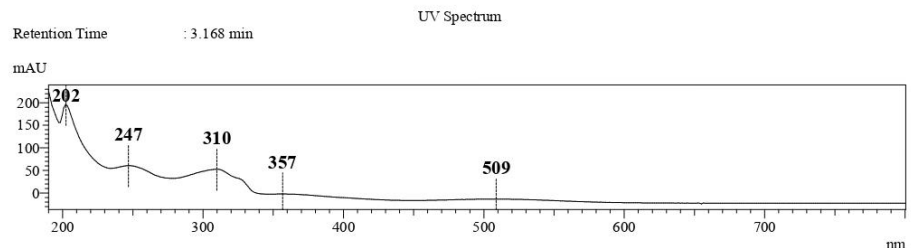

**Figure S3p:** RP-HPLC-MS of **3a**; HPLC purity 100%; UV-vis spectrum shown at Rt = 3.168 min.

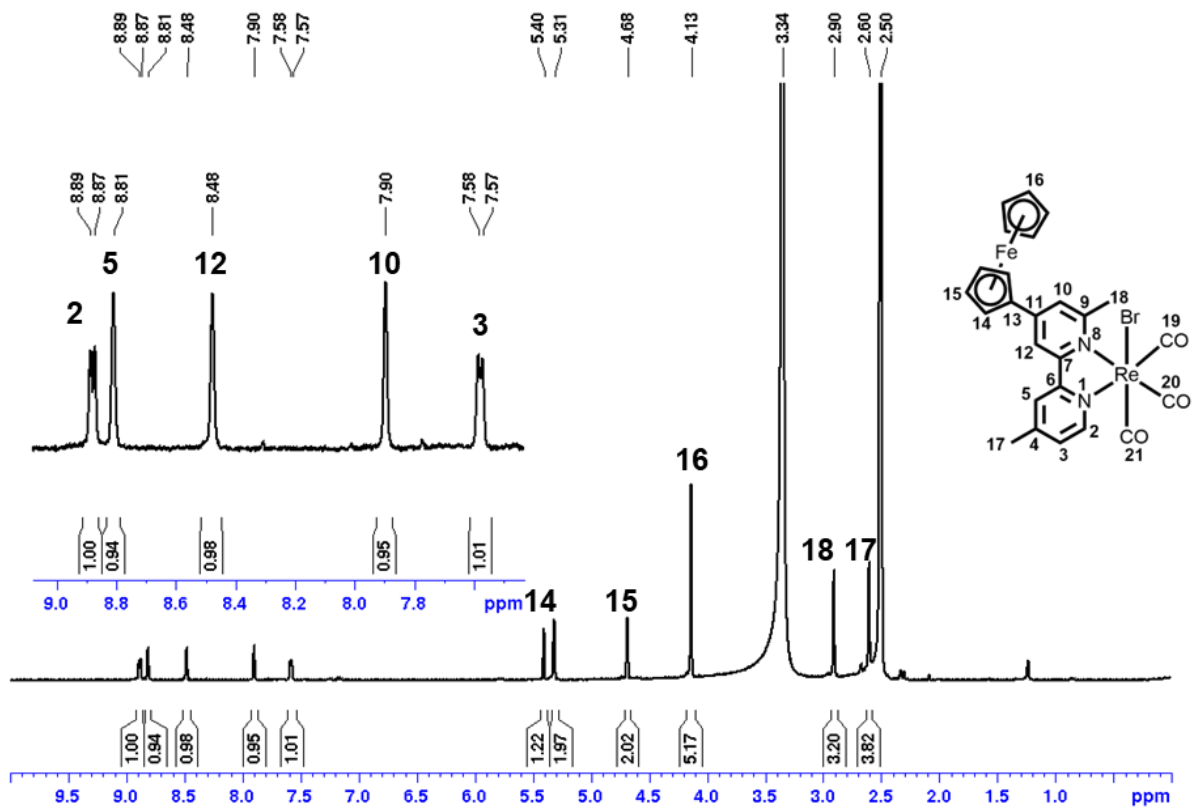

**Figure S3q:**  $^1\text{H}$  NMR (DMSO- $\text{D}_6$ , 400 MHz) spectrum of **3b**.

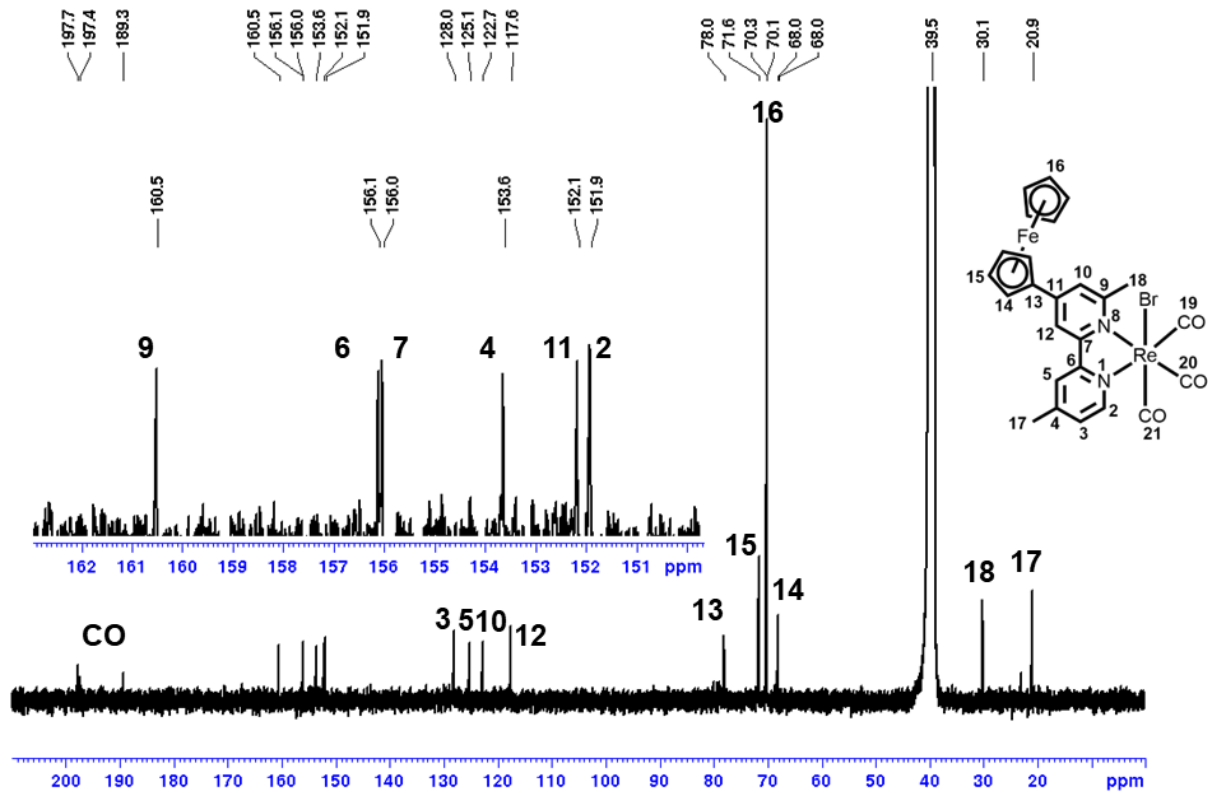

**Figure S3r:**  $^{13}\text{C}\{^1\text{H}\}$  NMR (101 MHz, DMSO- $\text{D}_6$ ) spectrum of **3b**, with 12630 scans.

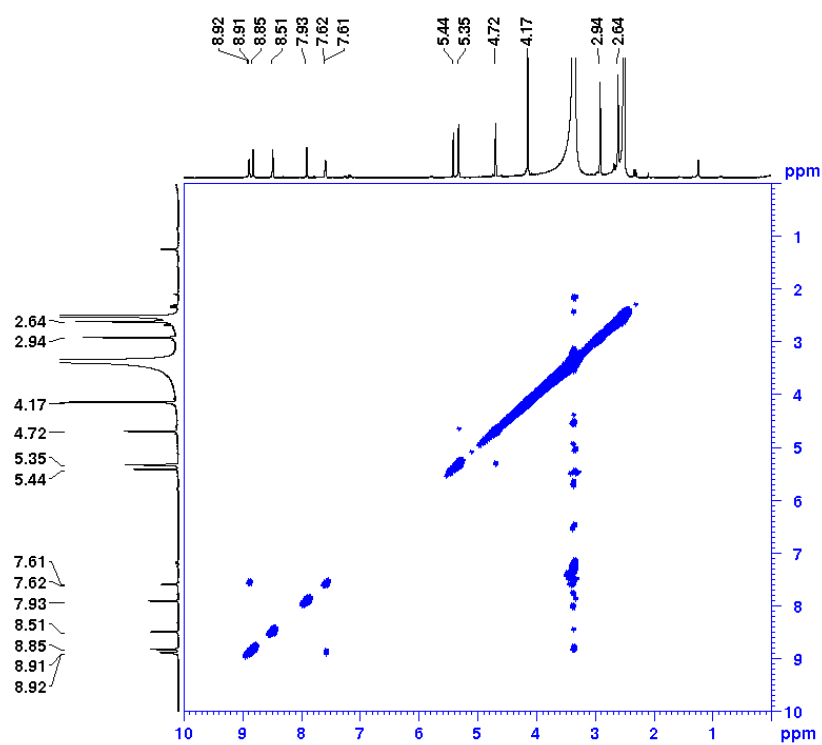

**Figure S3s:**  $^1\text{H}$ - $^1\text{H}$  correlation spectrum of **3b** (400 MHz,  $\text{DMSO-D}_6$ ).

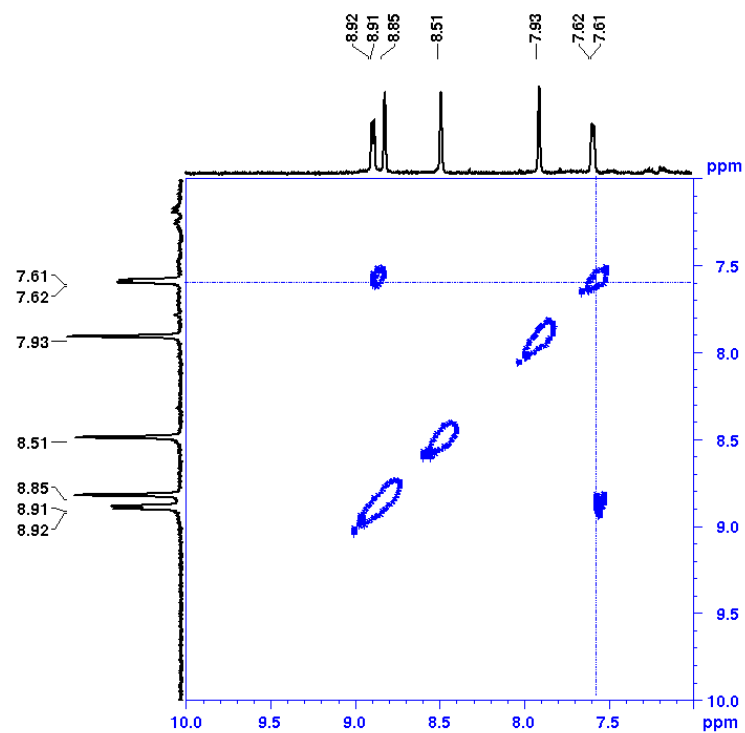

**Figure S3t:**  $^1\text{H}$ - $^1\text{H}$  correlation spectrum of **3b**, showing the correlations amongst the aromatic protons.

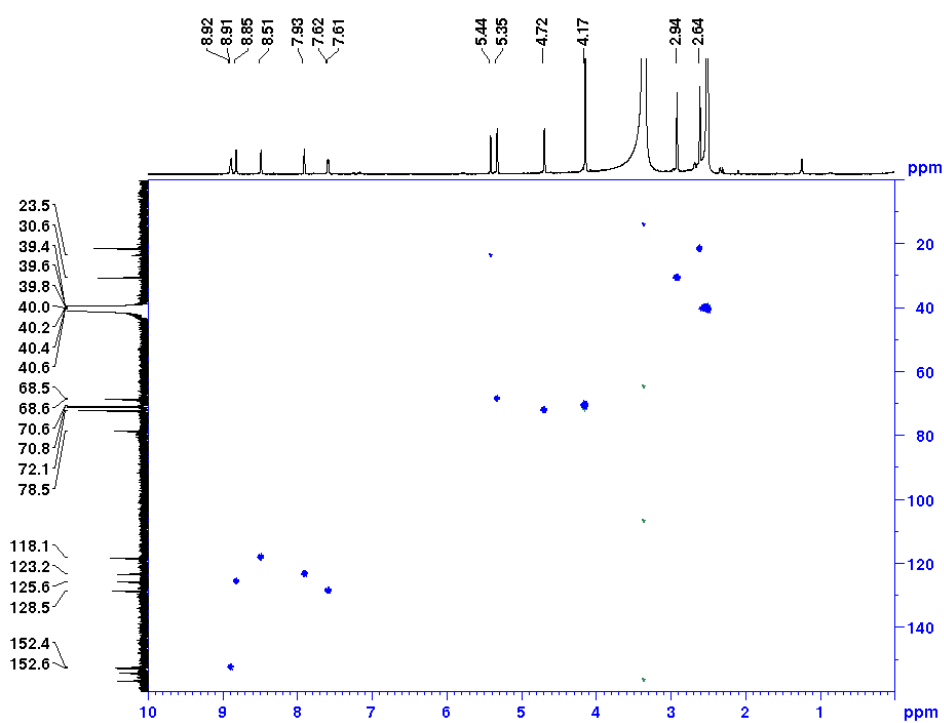

Figure S3u: HSQC spectrum of **3b** (400 MHz, DMSO-D<sub>6</sub>).

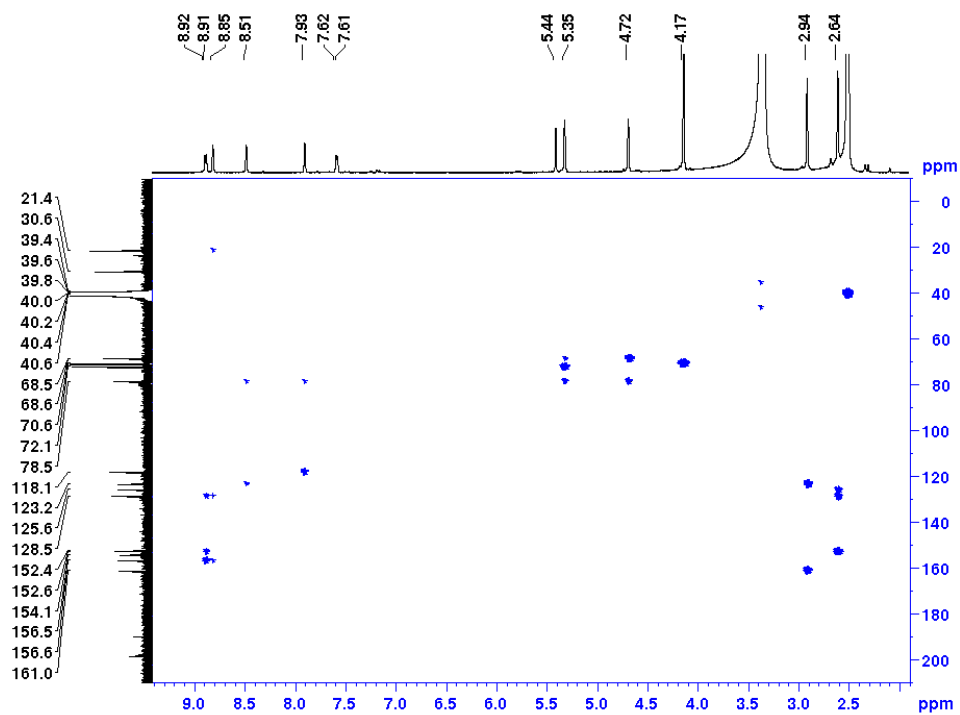

Figure S3v: HMBC spectrum of **3b** (400 MHz, DMSO-D<sub>6</sub>).

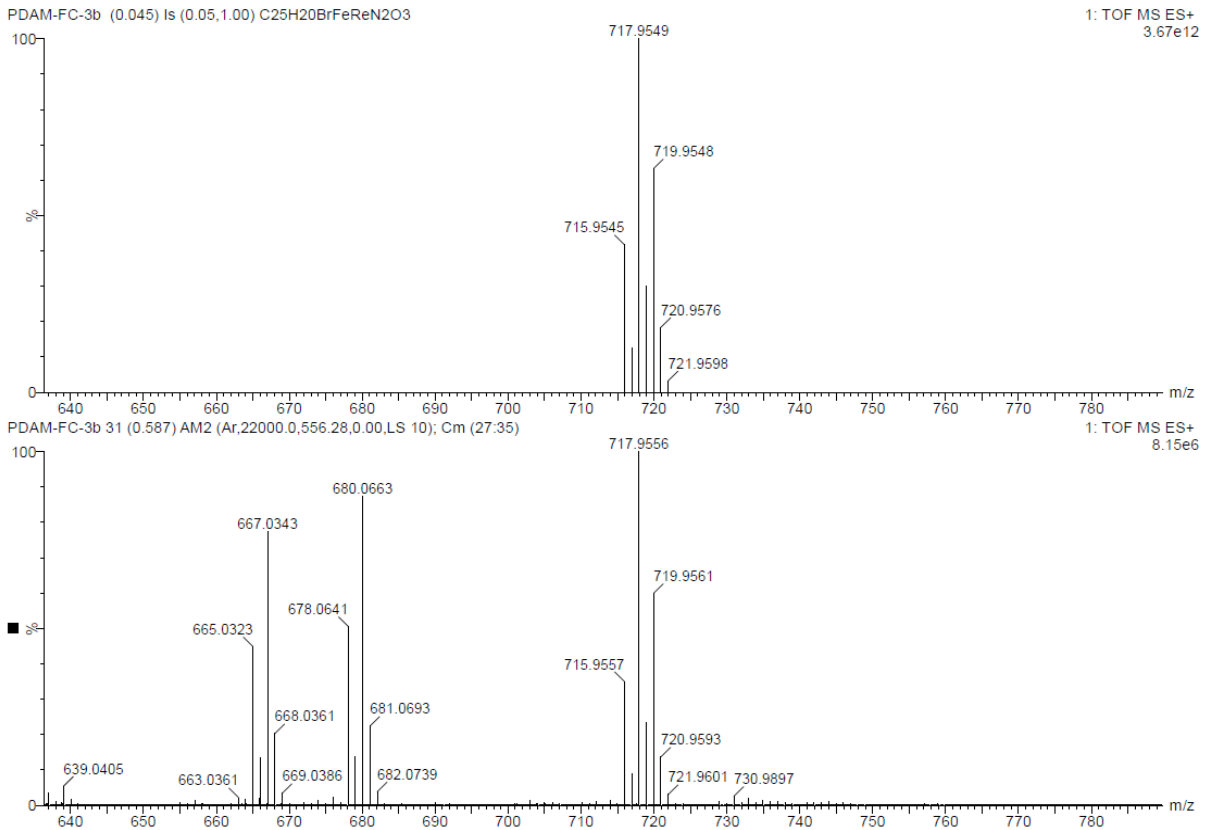

**Figure S3w:** HRMS spectrum of **3b** (M: C<sub>25</sub>H<sub>20</sub>BrFeN<sub>2</sub>O<sub>3</sub>Re) m/z calcd for [M<sup>+</sup>] 717.9583, m/z found [M<sup>+</sup>] 717.9556.

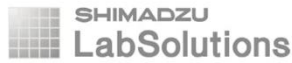

## Analysis Report

### <Sample Information>

|                  |                               |              |                        |
|------------------|-------------------------------|--------------|------------------------|
| Sample Name      | : Fc3b                        | Sample Type  | : Unknown              |
| Sample ID        | : Fc3b                        | Acquired by  | : System Administrator |
| Data Filename    | : Fc3b_011.lcd                | Processed by | : System Administrator |
| Method Filename  | : B_95_D_5_10min_0_2mLmin.lcm |              |                        |
| Batch Filename   | : 01042024.lcb                |              |                        |
| Vial #           | : 1-95                        |              |                        |
| Injection Volume | : 1 uL                        |              |                        |
| Date Acquired    | : 4/2/2024 2:33:44 PM         |              |                        |
| Date Processed   | : 9/25/2024 5:38:36 PM        |              |                        |

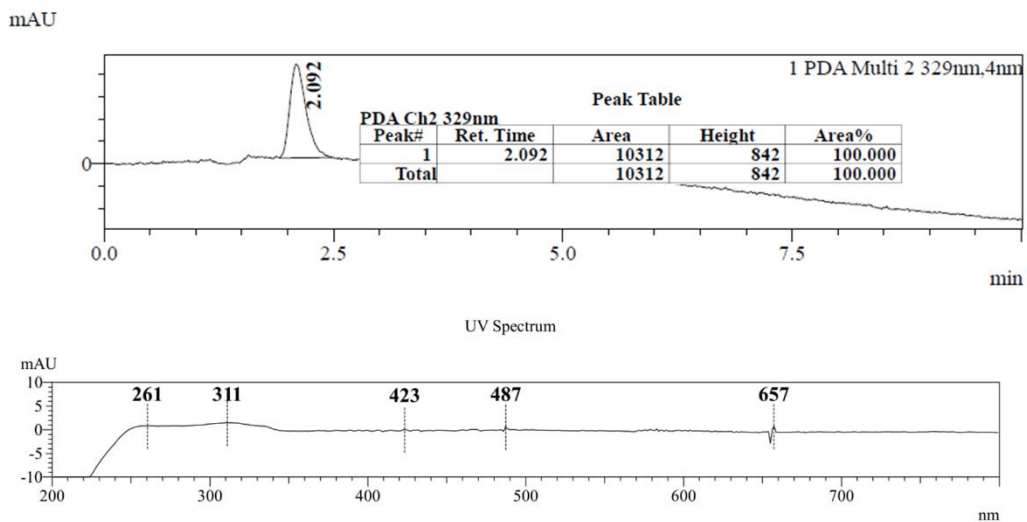

**Figure S3x:** RP-HPLC-MS of **3b**; HPLC purity 100%; UV-vis spectrum shown at Rt = 2.092 min.

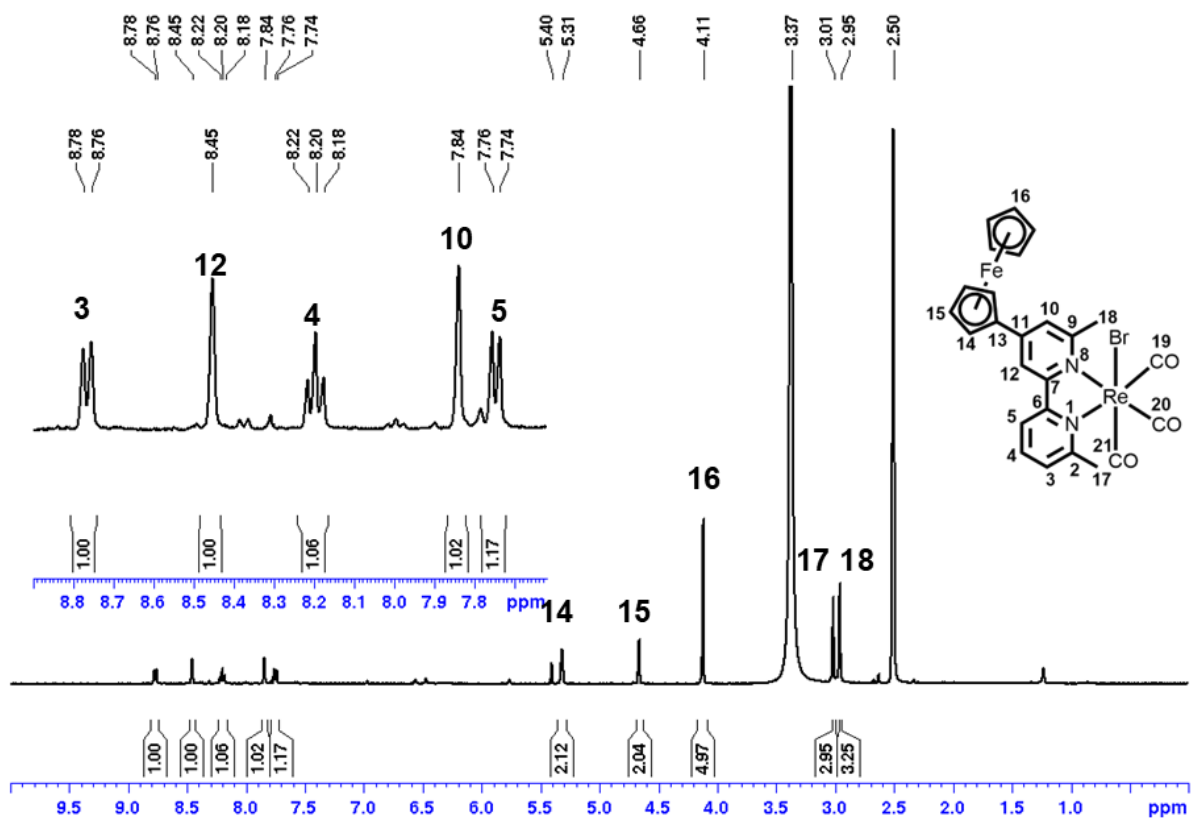

**Figure S3y:**  $^1\text{H}$  NMR (DMSO- $\text{D}_6$ , 400 MHz) spectrum of **3c**.

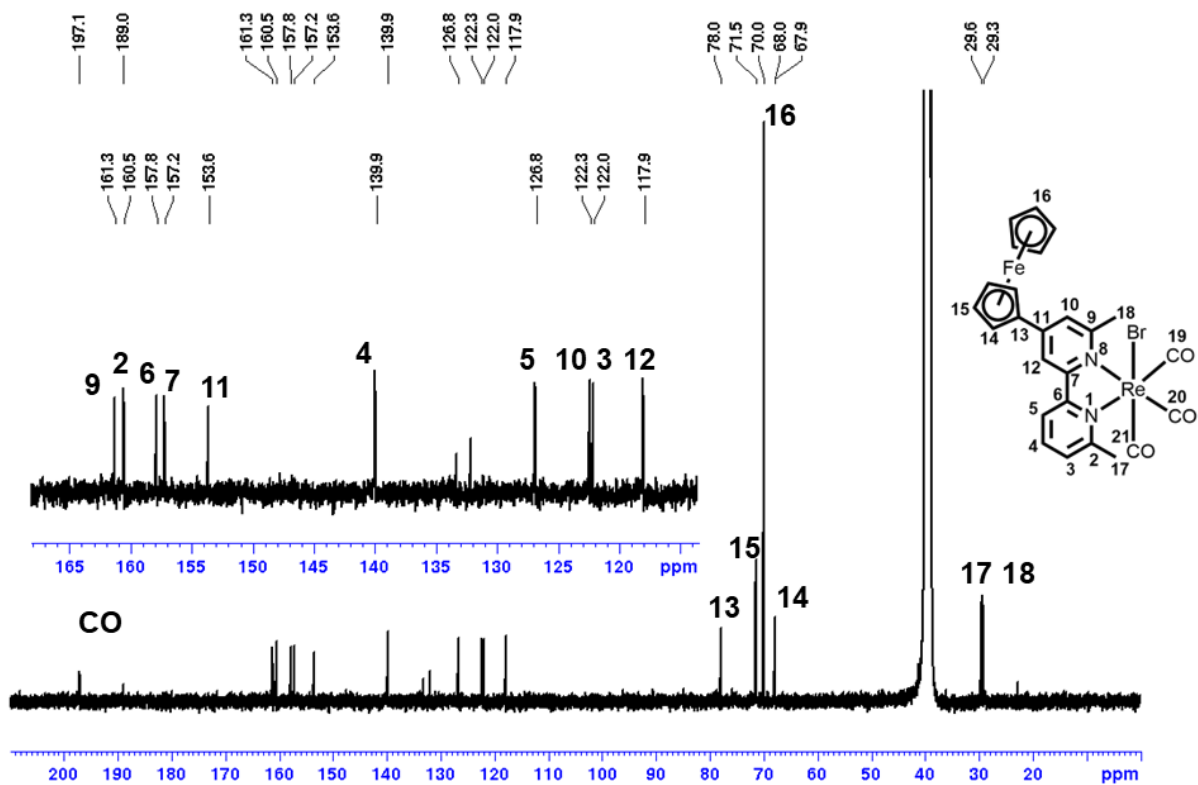

**Figure S3z:**  $^{13}\text{C}\{^1\text{H}\}$  NMR (101 MHz, DMSO- $\text{D}_6$ ) spectrum of **3c**, with 12325 scans.

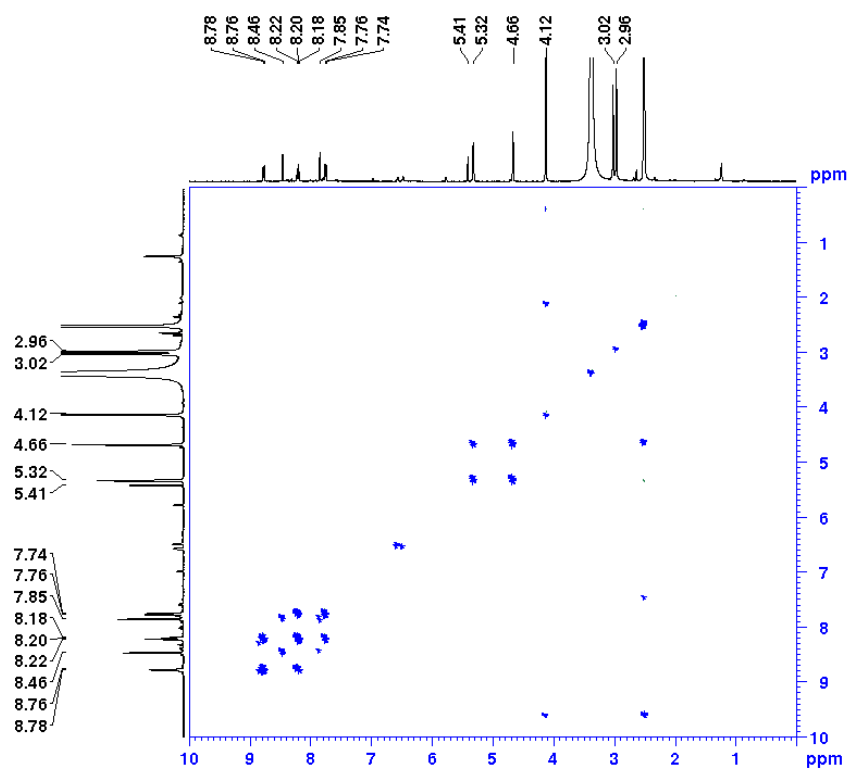

**Figure S3aa:**  $^1\text{H}$ - $^1\text{H}$  correlation spectrum of **3c** (400 MHz,  $\text{DMSO-D}_6$ ).

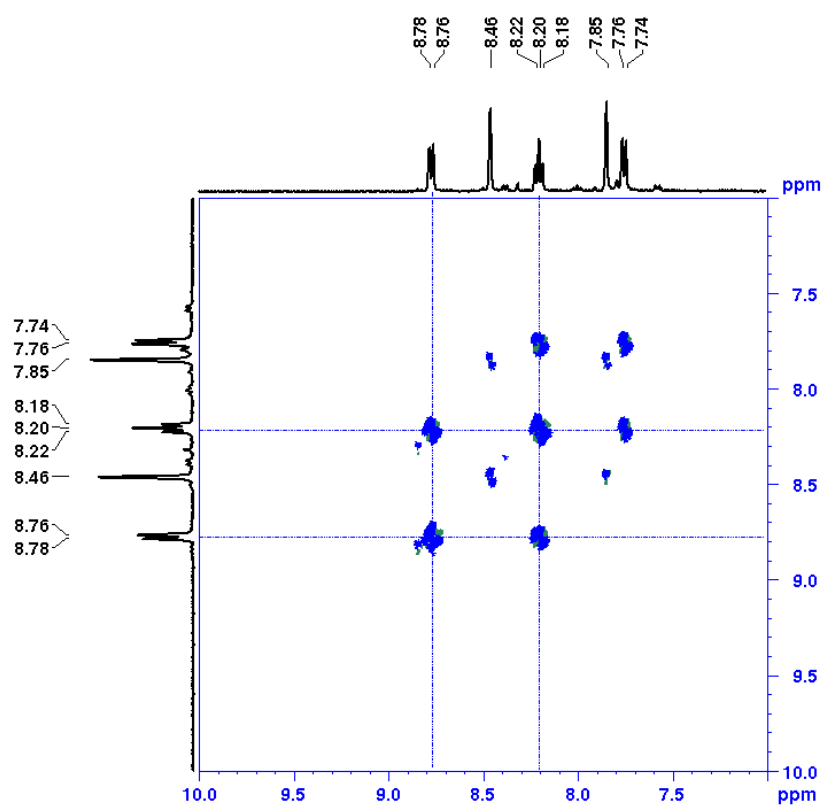

**Figure S3ab:**  $^1\text{H}$ - $^1\text{H}$  correlation spectrum of **3c**, showing the correlations amongst the aromatic protons.

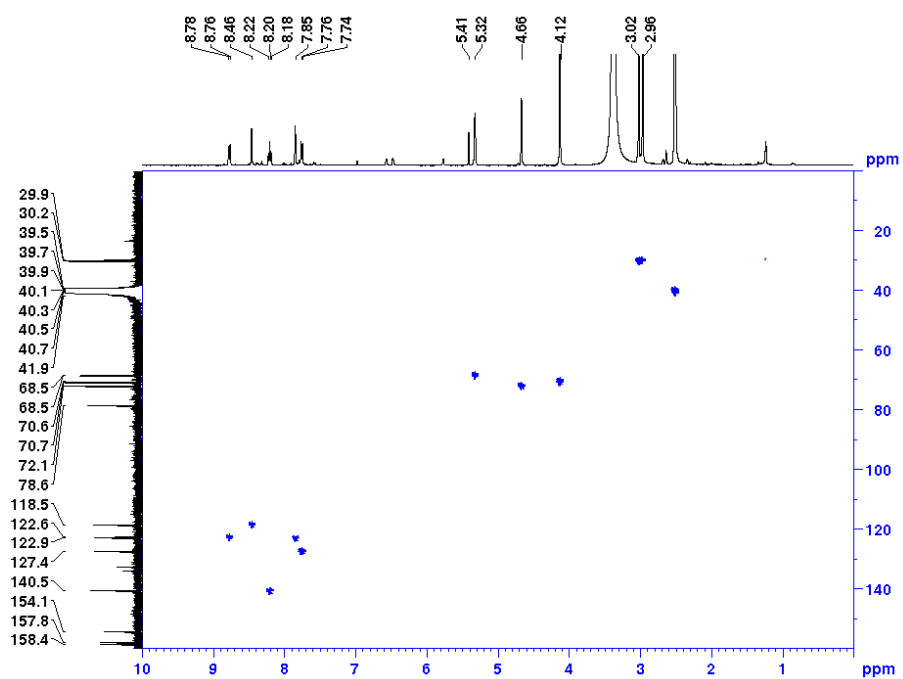

Figure S3ac: HSQC spectrum of **3c** (400 MHz, DMSO-D<sub>6</sub>).

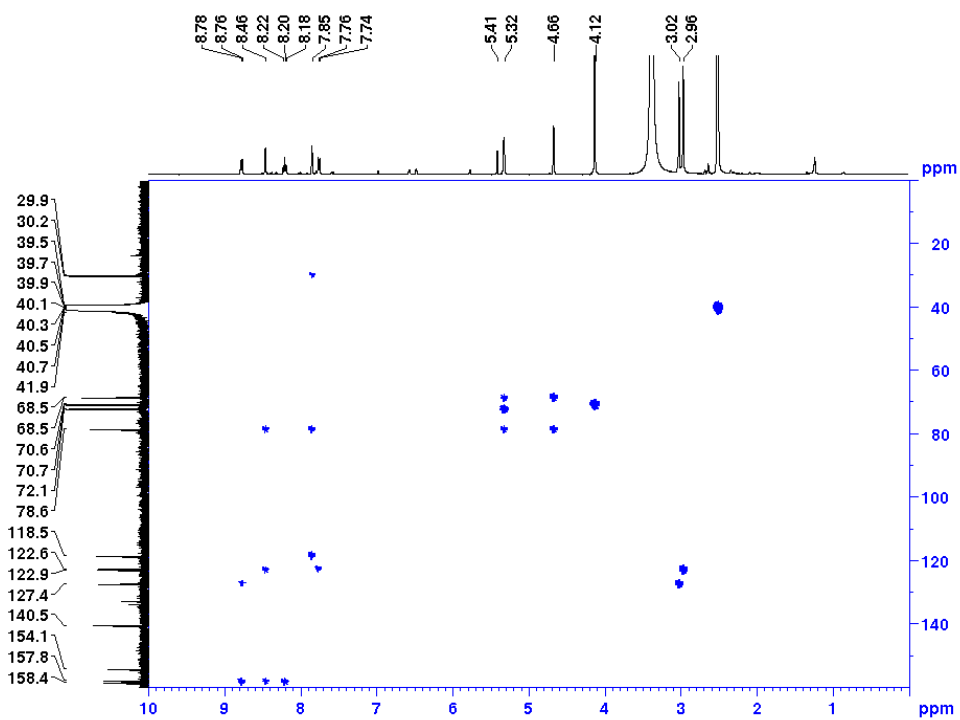

Figure S3ad: HMBC spectrum of **3c** (400 MHz, DMSO-D<sub>6</sub>).

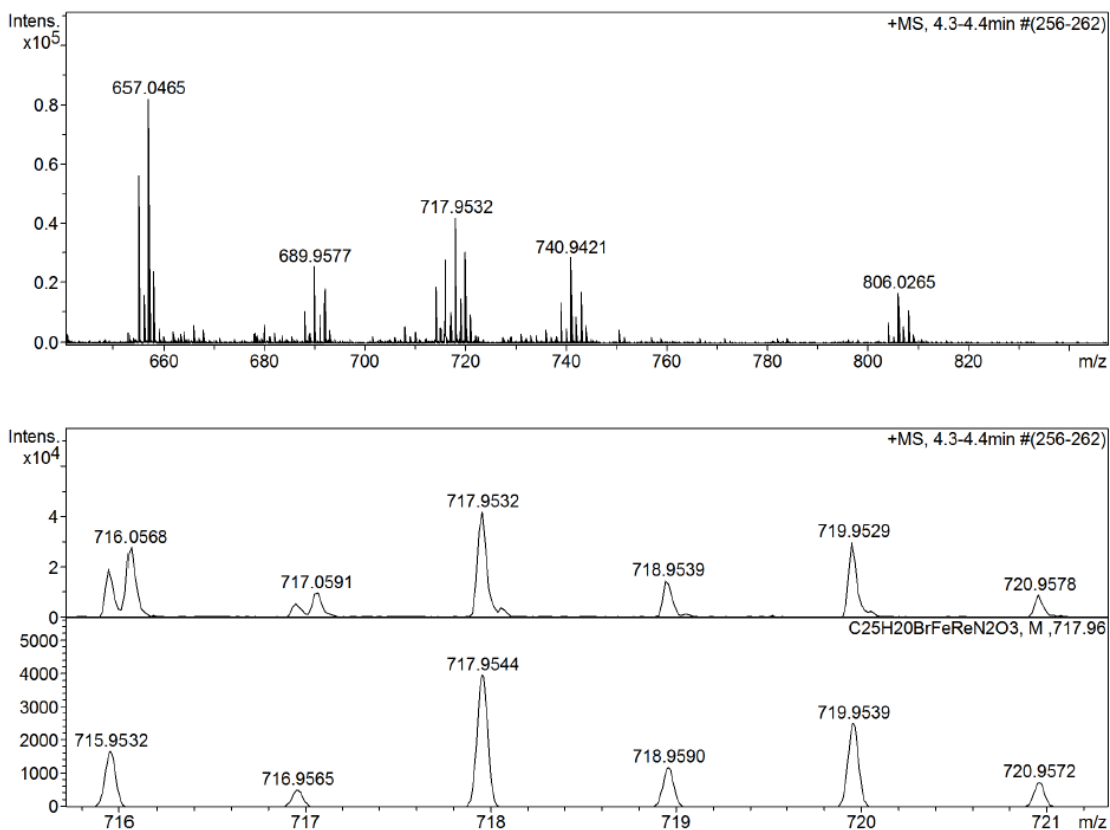

**Figure S3ae:** HRMS spectrum of **3c** (M: C<sub>25</sub>H<sub>20</sub>BrFeReN<sub>2</sub>O<sub>3</sub>Re) *m/z* calcd for [M<sup>+</sup>] 717.9583, *m/z* found [M<sup>+</sup>] 717.9532.

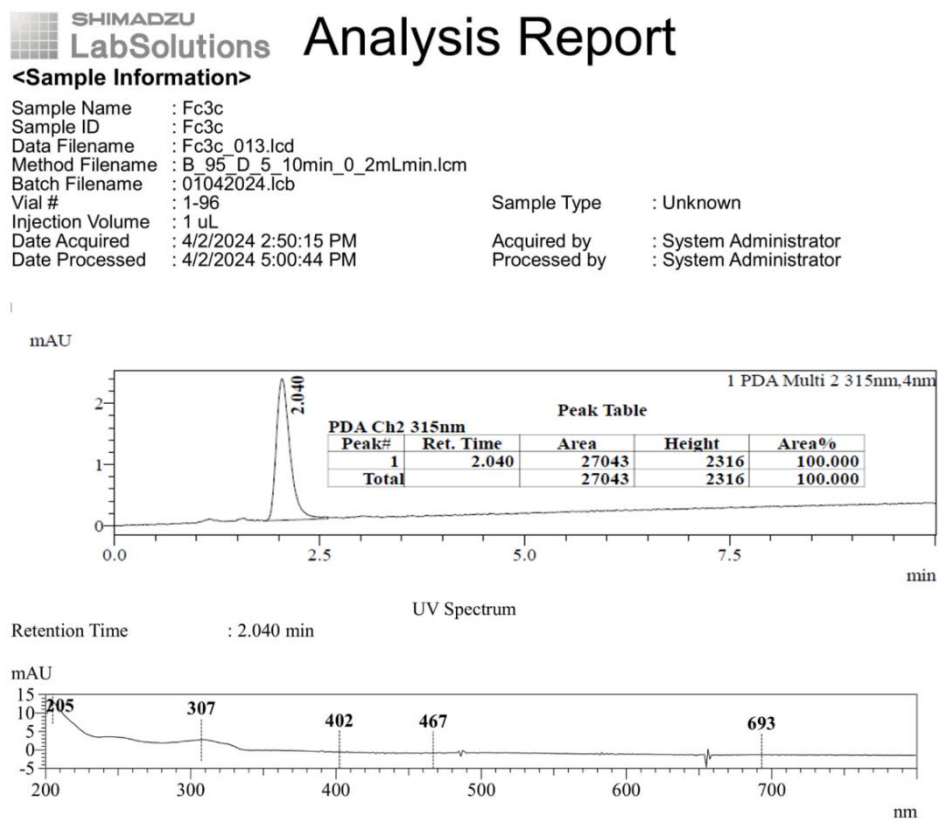

**Figure S3af:** RP-HPLC-MS of **3c**; HPLC purity 100%; UV-vis spectrum shown at Rt = 2.040 min.

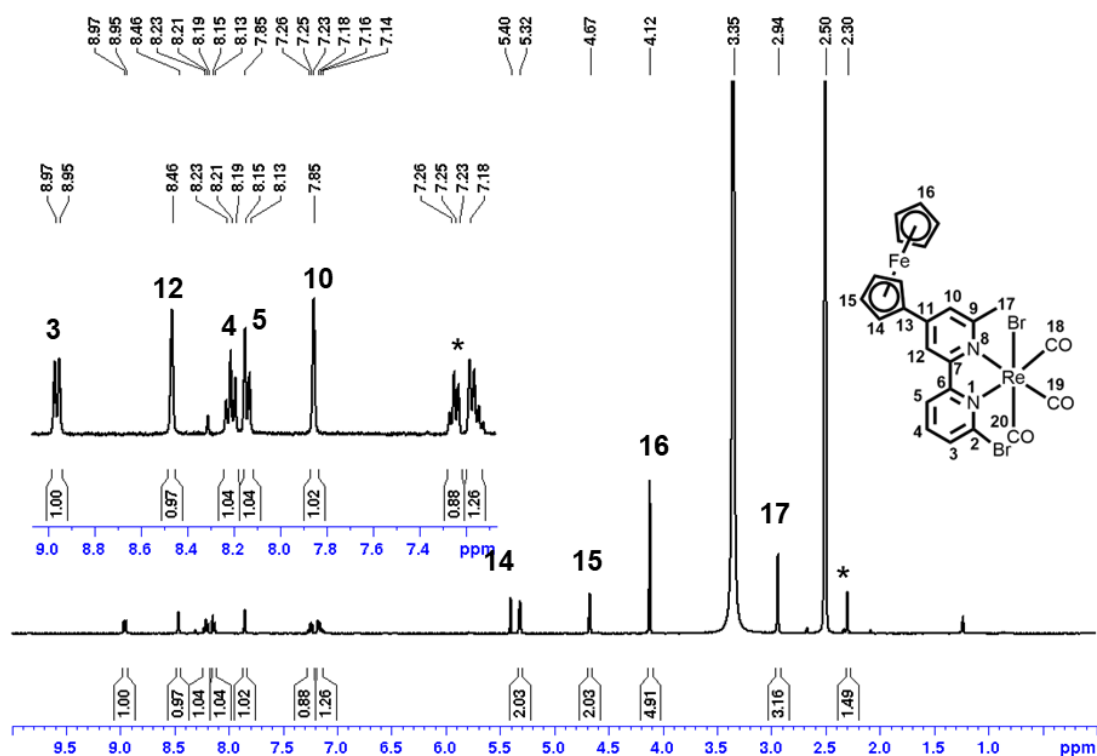

**Figure S3ag:**  $^1\text{H}$  NMR (DMSO- $\text{D}_6$ , 400 MHz) spectrum of **3d**; toluene peaks marked with \*; observed at 7.25, 7.18 & 2.30 ppm; reported<sup>14</sup> at 7.25, 7.18 & 2.30 ppm; ~0.5 molecules of toluene as solvent of crystallization, verified by thermogravimetric analysis.

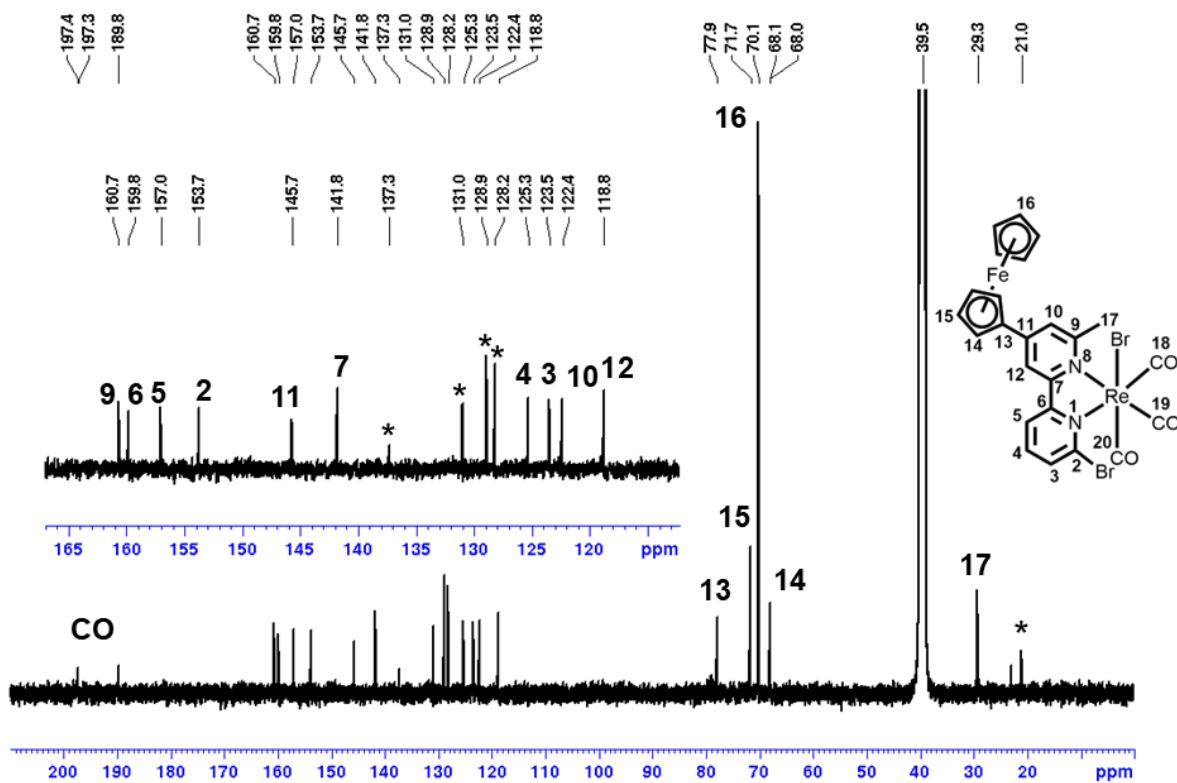

**Figure S3ah:**  $^{13}\text{C}\{^1\text{H}\}$  NMR (101 MHz, DMSO- $\text{D}_6$ ) spectrum of **3d**, with 13329 scans; toluene peaks marked with \*; observed at 137.3, 131.0, 128.9, 128.2 & 21.0 ppm; reported at<sup>14</sup> 137.4, 128.9, 128.2, 125.3 & 21.0 ppm.

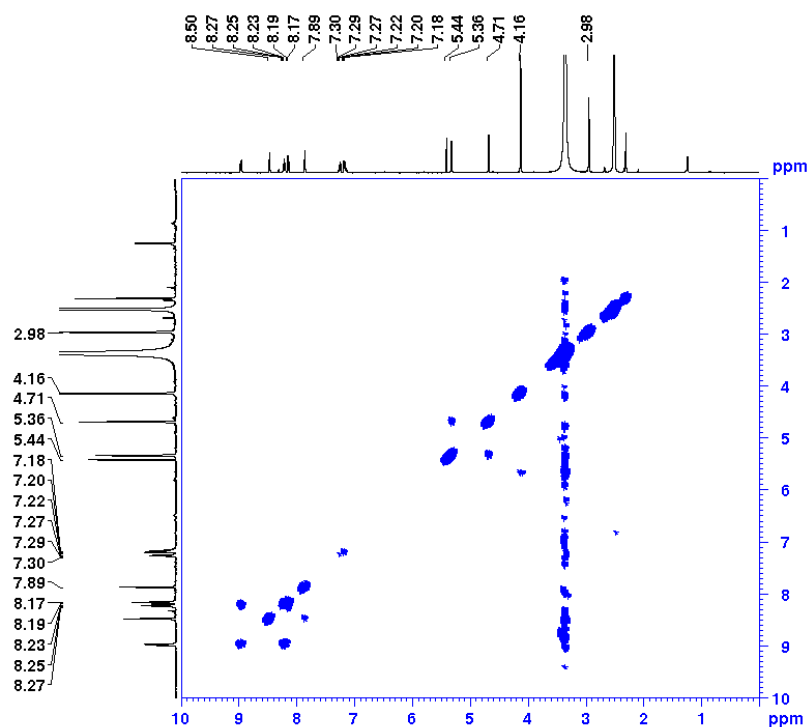

**Figure S3ai:**  $^1\text{H}$ - $^1\text{H}$  correlation spectrum of **3d** (400 MHz,  $\text{DMSO-D}_6$ ).

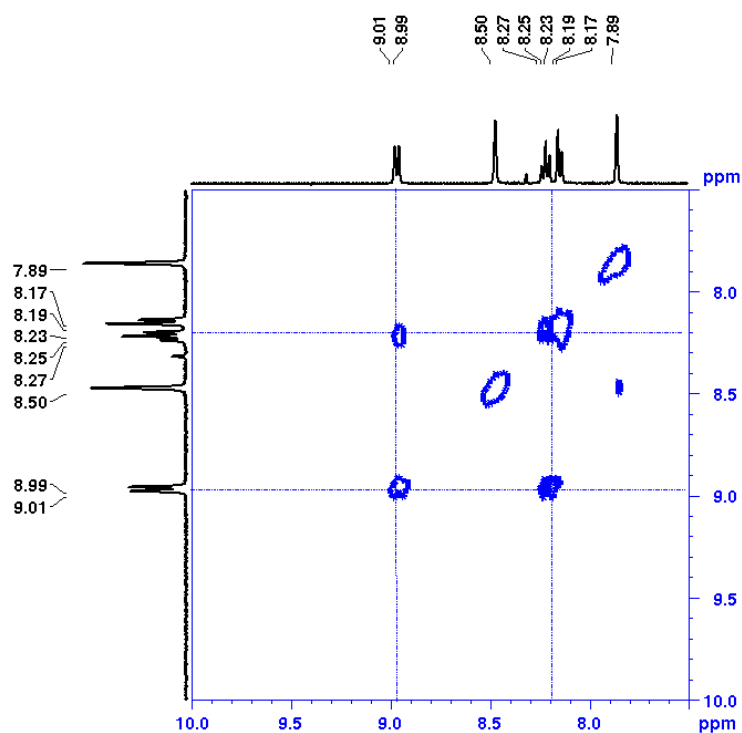

**Figure S3aj:**  $^1\text{H}$ - $^1\text{H}$  correlation spectrum of **3d**, showing the correlations amongst the aromatic protons.

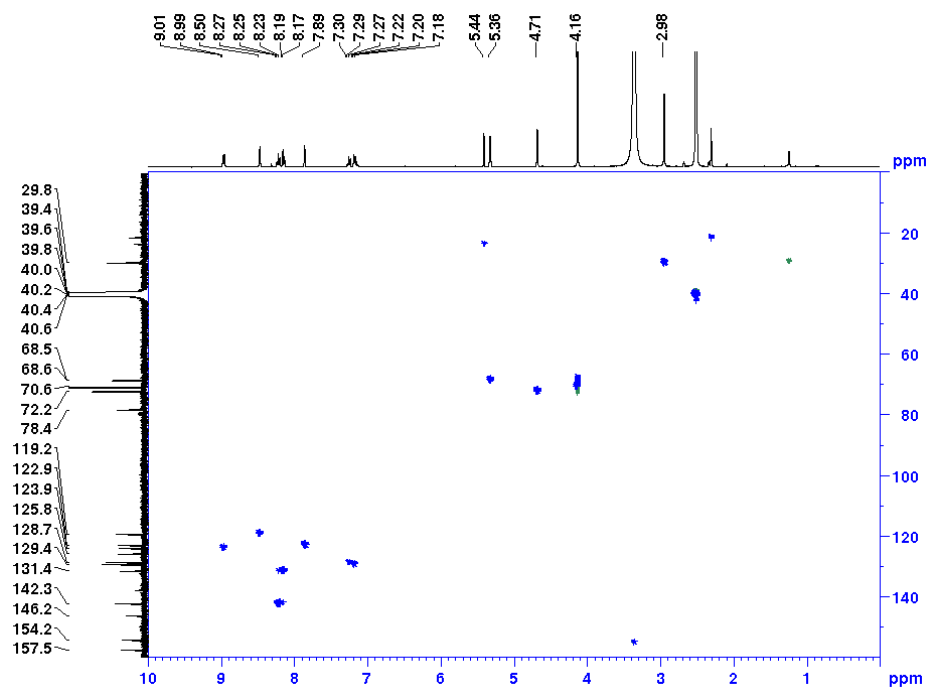

Figure S3ak: HSQC spectrum of **3d** (400 MHz, DMSO- $\text{D}_6$ ).

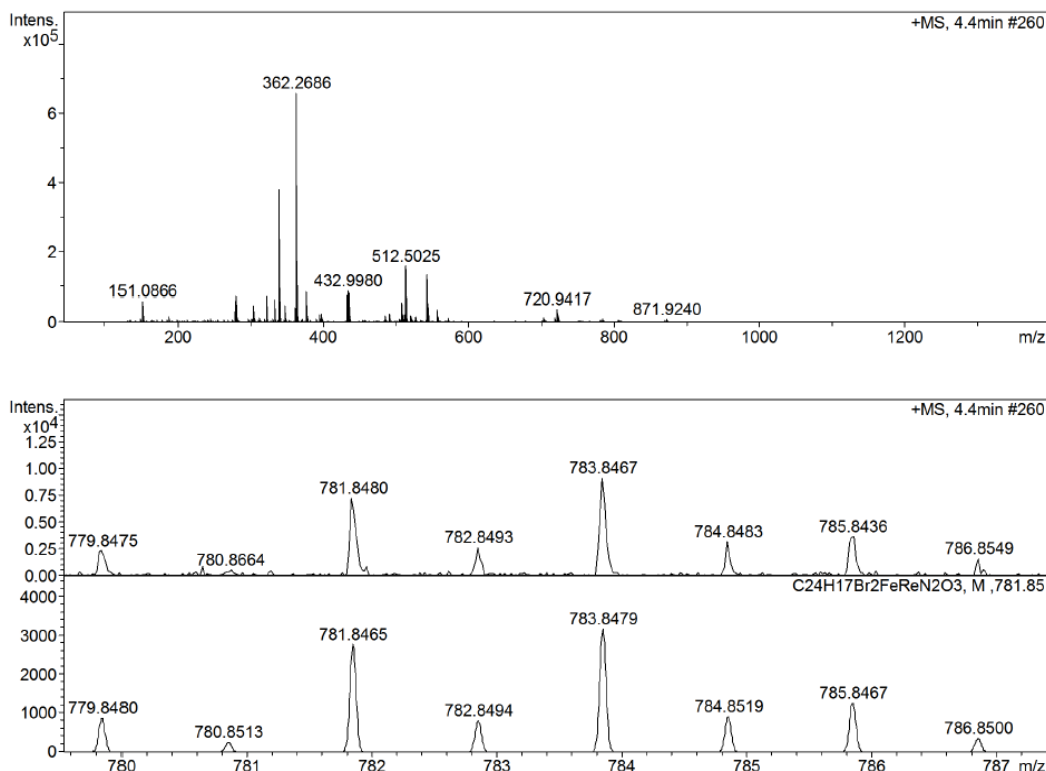

**Figure S3al:** HRMS spectrum of **3d** (M: C<sub>24</sub>H<sub>17</sub>Br<sub>2</sub>FeN<sub>2</sub>O<sub>3</sub>Re) *m/z* calcd for [M<sup>+</sup>] 783.8531, *m/z* found [M<sup>+</sup>] 783.8467.

**SHIMADZU LabSolutions Analysis Report**

**<Sample Information>**

|                  |                               |              |                        |
|------------------|-------------------------------|--------------|------------------------|
| Sample Name      | : Fc3d                        | Sample Type  | : Unknown              |
| Sample ID        | : Fc3d                        | Acquired by  | : System Administrator |
| Data Filename    | : Fc3d_015.lcd                | Processed by | : System Administrator |
| Method Filename  | : B_95_D_5_10min_0_2mLmin.lcm |              |                        |
| Batch Filename   | : 01042024.lcb                |              |                        |
| Vial #           | : 1-97                        |              |                        |
| Injection Volume | : 1 uL                        |              |                        |
| Date Acquired    | : 4/2/2024 3:06:53 PM         |              |                        |
| Date Processed   | : 4/2/2024 5:07:18 PM         |              |                        |

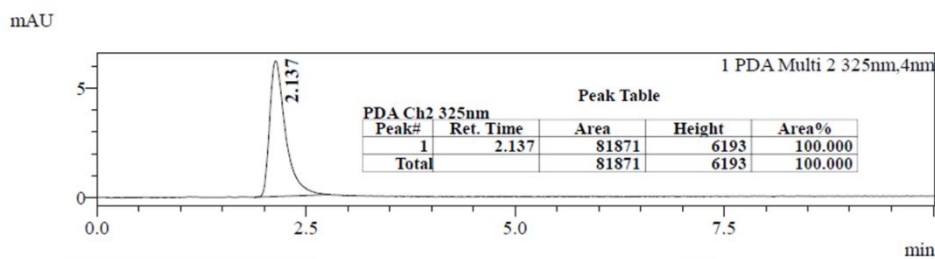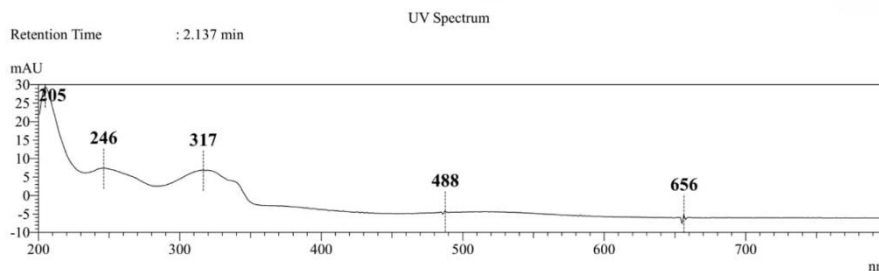

**Figure S3am:** RP-HPLC-MS of **3d**; HPLC purity 100%; UV-vis spectrum shown at Rt = 2.137 min.

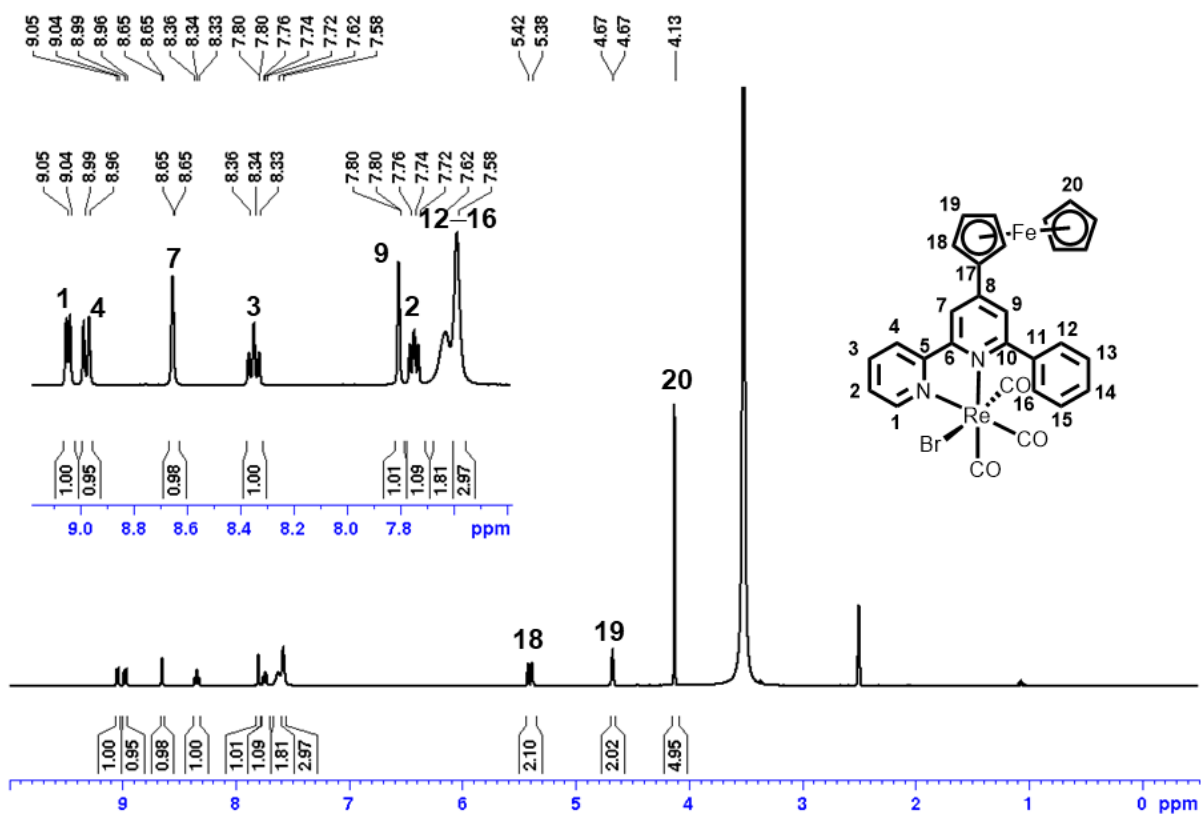

Figure S3an: <sup>1</sup>H NMR (400 MHz, DMSO-D<sub>6</sub>) spectrum of **3e**.

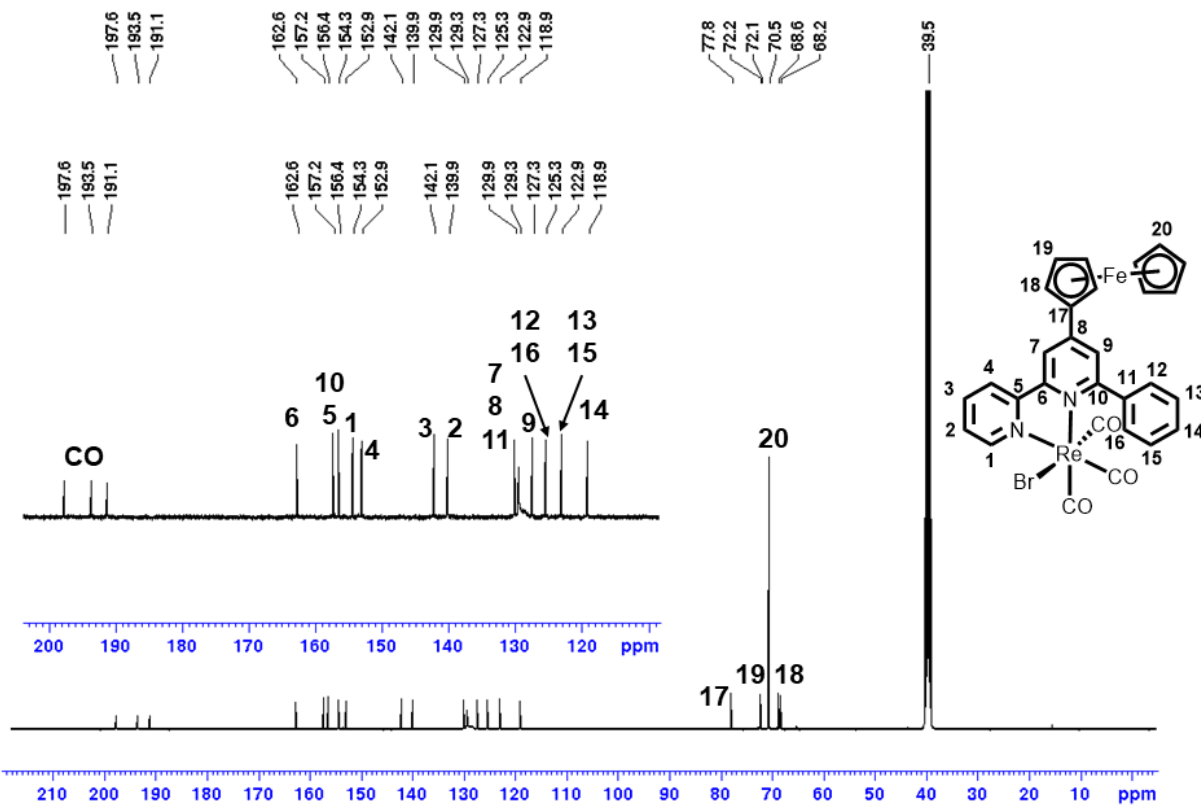

Figure S3ao: <sup>13</sup>C {<sup>1</sup>H} NMR (101 MHz, DMSO-D<sub>6</sub>) spectrum of **3e**, with 12914 scans.

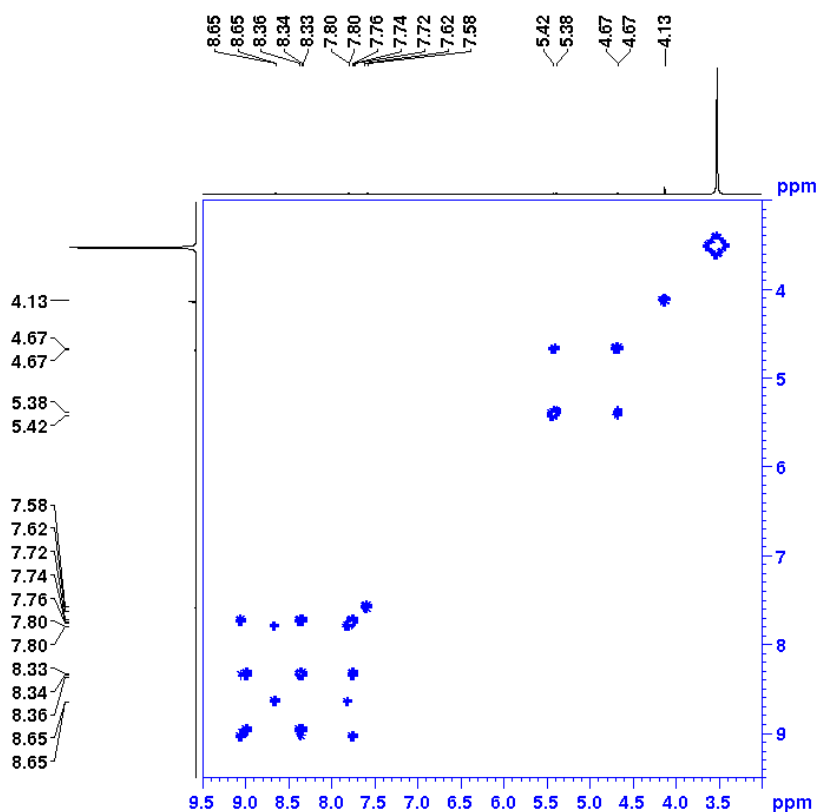

Figure S3ap:  $^1\text{H}$ - $^1\text{H}$  correlation spectrum of **3e** (400 MHz,  $\text{DMSO-D}_6$ ).

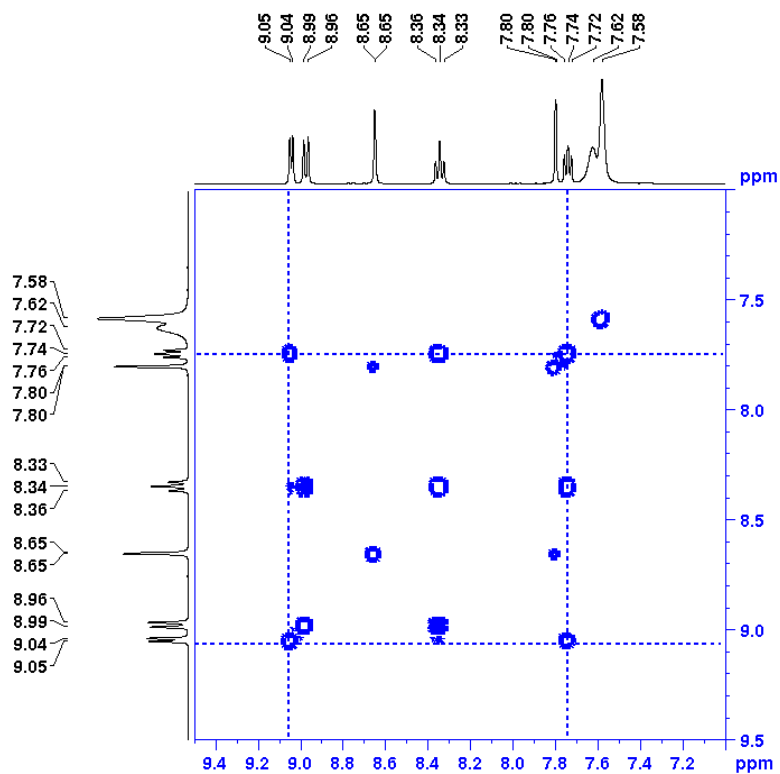

Figure S3aq:  $^1\text{H}$ - $^1\text{H}$  correlation spectrum of **3e** (400 MHz,  $\text{DMSO-D}_6$ ), showing the correlations amongst the aromatic protons.

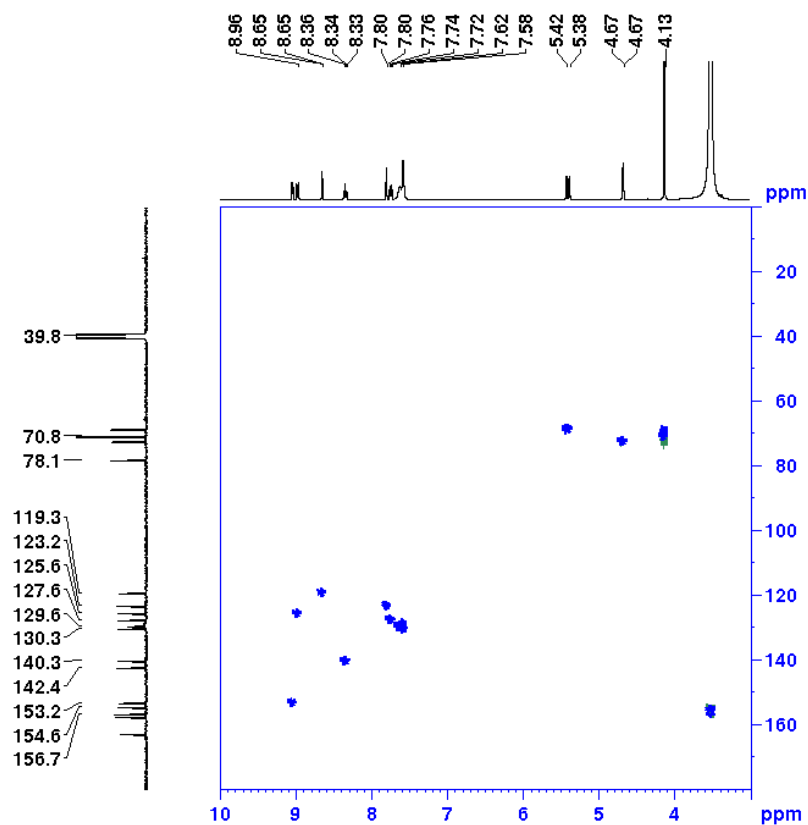

Figure S3ar: HSQC spectrum of **3e** (400 MHz, DMSO-D<sub>6</sub>).

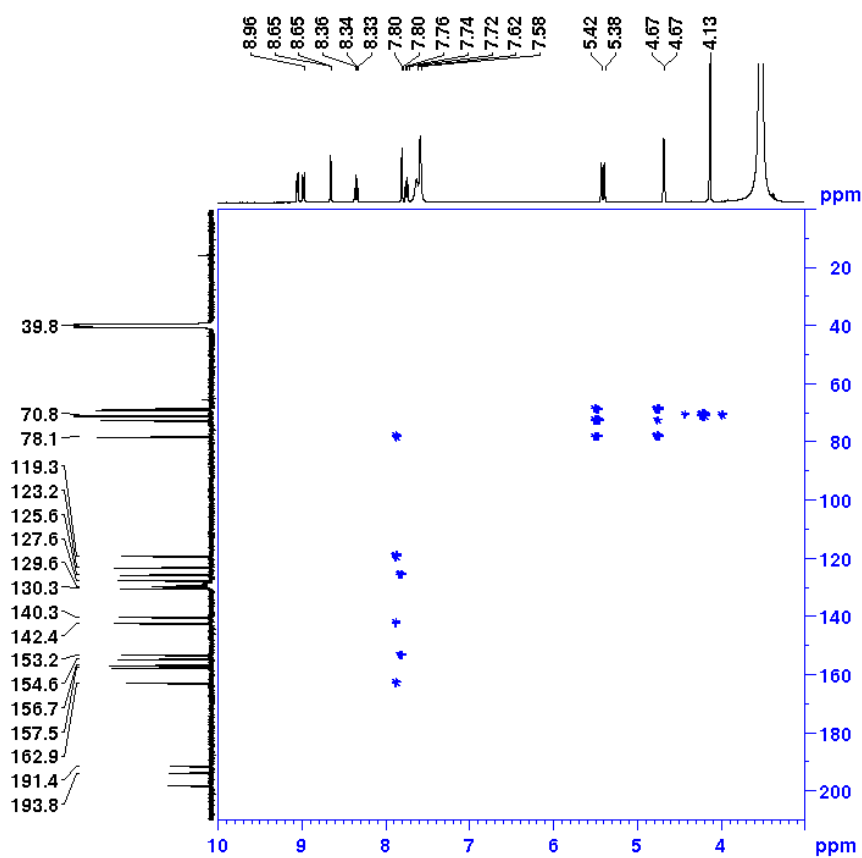

Figure S3as: HMBC spectrum of **3e** (400 MHz, DMSO-D<sub>6</sub>).

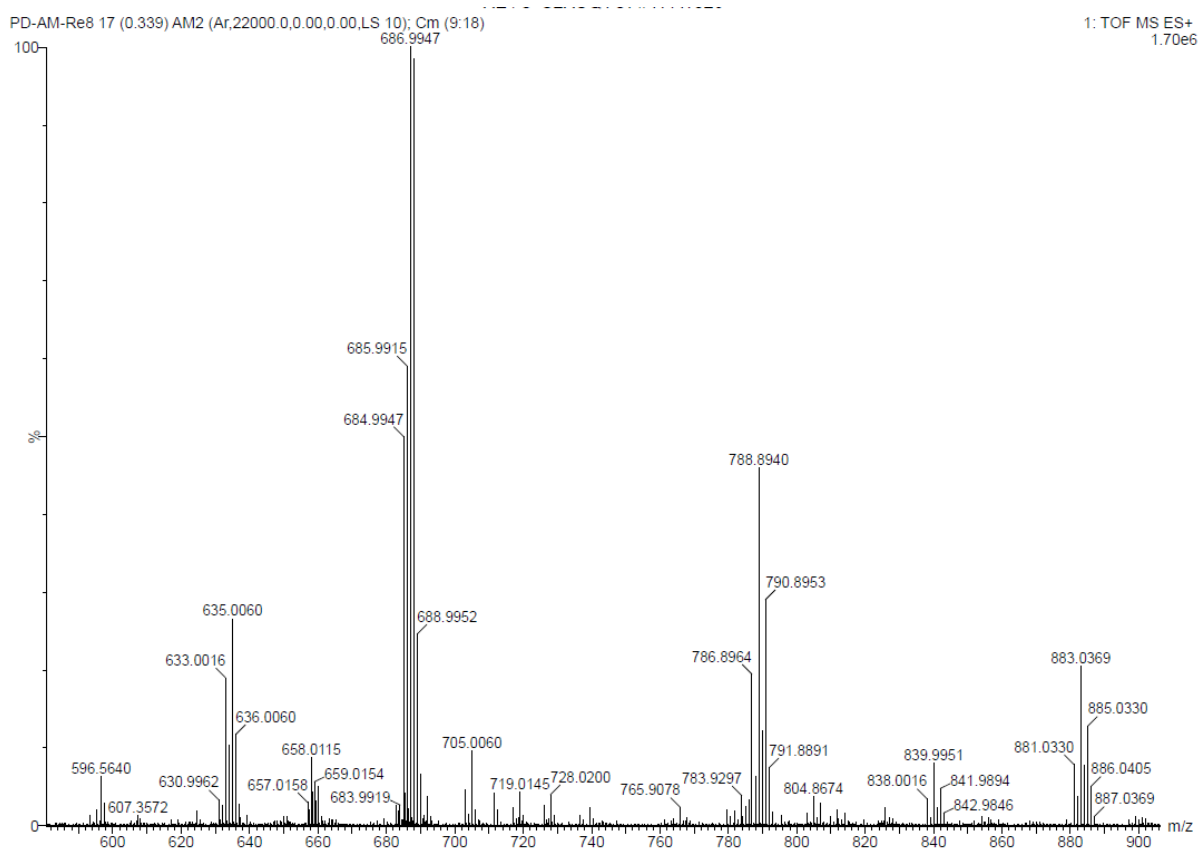

**Figure S3at:** HRMS spectrum of **3e** (M: C<sub>29</sub>H<sub>20</sub>BrFeN<sub>2</sub>O<sub>3</sub>Re) *m/z* calcd for [M+Na<sup>+</sup>] 788.9480, *m/z* found [M+Na<sup>+</sup>] 788.8940.

SHIMADZU LabSolutions Analysis Report

<Sample Information>

|                  |                              |              |                        |
|------------------|------------------------------|--------------|------------------------|
| Sample Name      | : SS-SB-207                  | Sample Type  | : Unknown              |
| Sample ID        | : SS-SB-207                  | Acquired by  | : System Administrator |
| Data Filename    | : SS-SB-207_SS-SB-207_12.lcd | Processed by | : System Administrator |
| Method Filename  | : C_95_10min_0_2mLmin.lcm    |              |                        |
| Batch Filename   | : 25122024.lcb               |              |                        |
| Vial #           | : 1-93                       |              |                        |
| Injection Volume | : 5 uL                       |              |                        |
| Date Acquired    | : 12/25/2024 6:47:03 PM      |              |                        |
| Date Processed   | : 12/25/2024 6:57:07 PM      |              |                        |

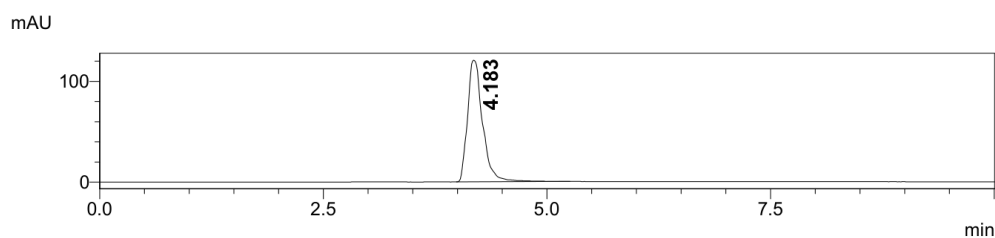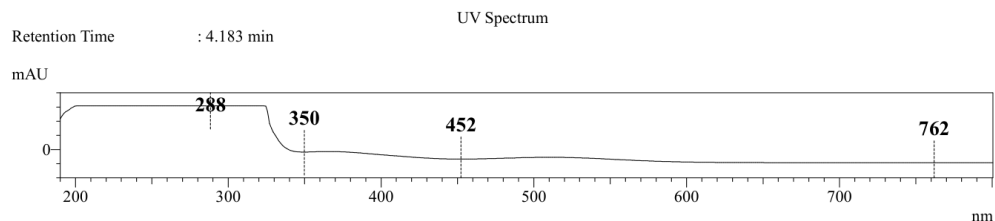

**Figure S3au:** RP-HPLC-MS of **3e**; HPLC purity 100%; UV-vis spectrum shown at Rt = 4.183 min.

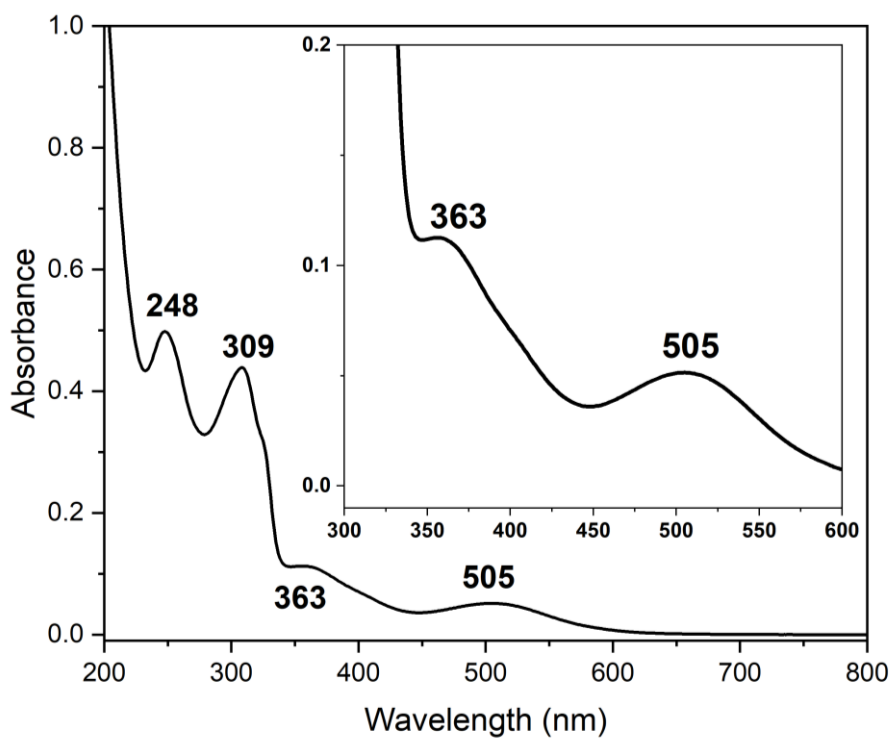

**Figure S3av:** Absorption spectrum of **3a** (0.1  $\mu$ M in acetonitrile); inset shows the zoomed region of 300–600 nm.

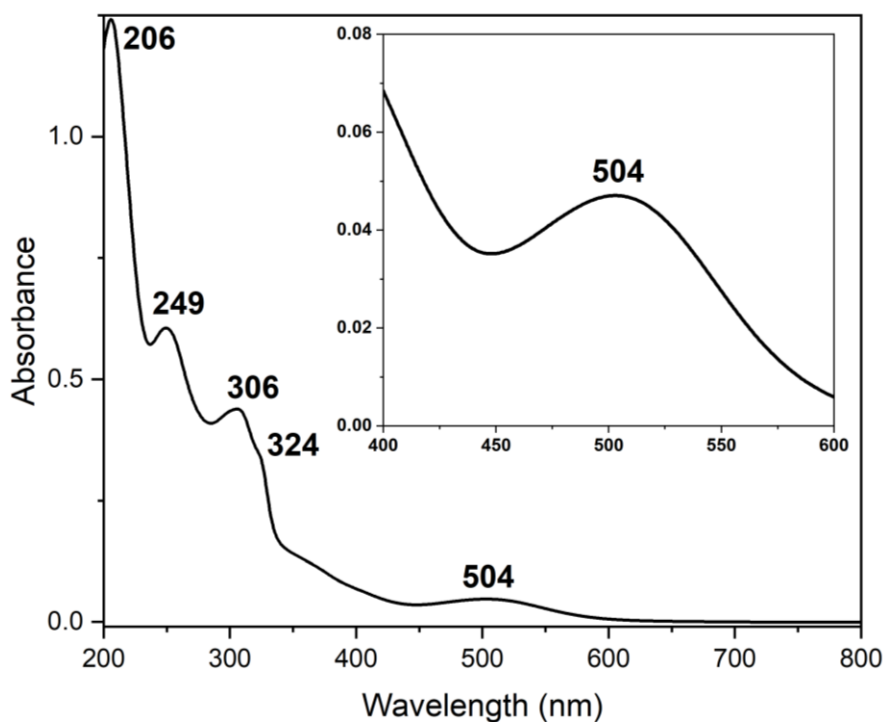

**Figure S3aw:** Absorption spectrum of **3b** (0.1  $\mu$ M in acetonitrile); inset shows the zoomed region of 400–600 nm.

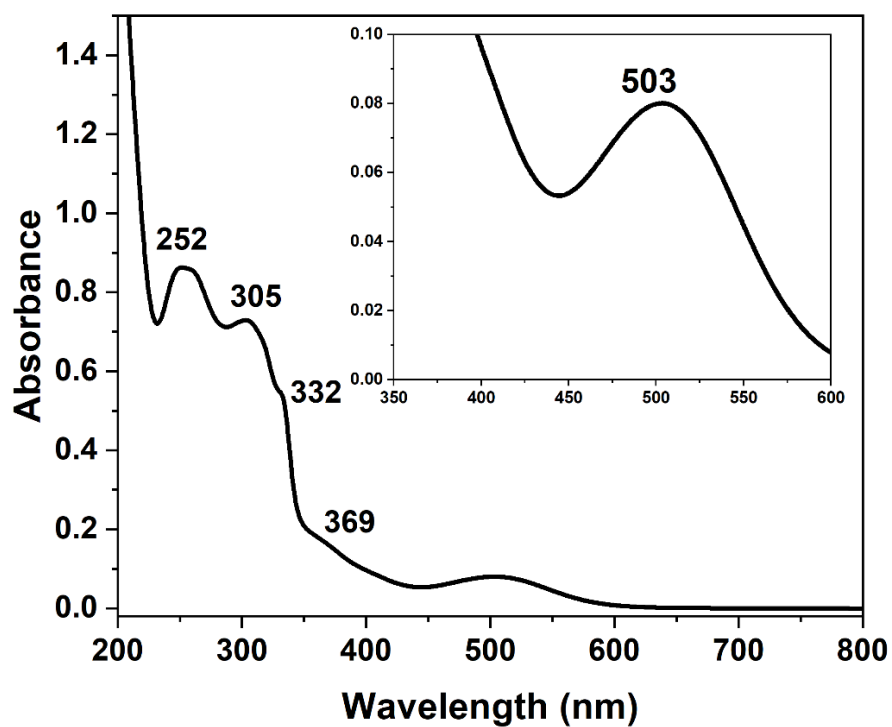

**Figure S3ax:** Absorption spectrum of **3c** (0.1  $\mu\text{M}$  in acetonitrile); inset shows the zoomed region of 350–600 nm.

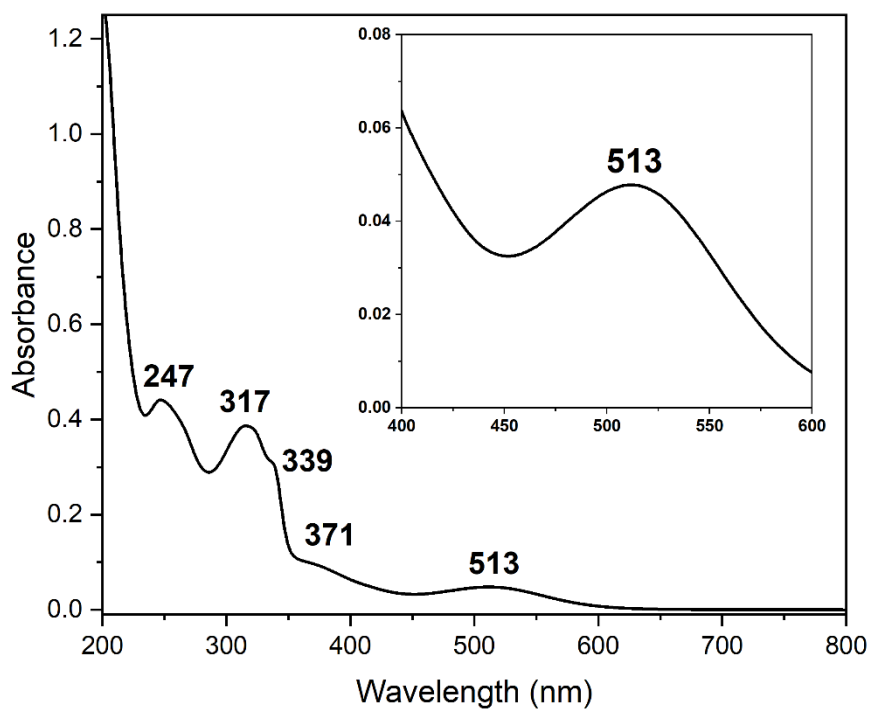

**Figure S3ay:** Absorption spectrum of **3d** (0.1  $\mu\text{M}$  in acetonitrile); inset shows the zoomed region of 400–600 nm.

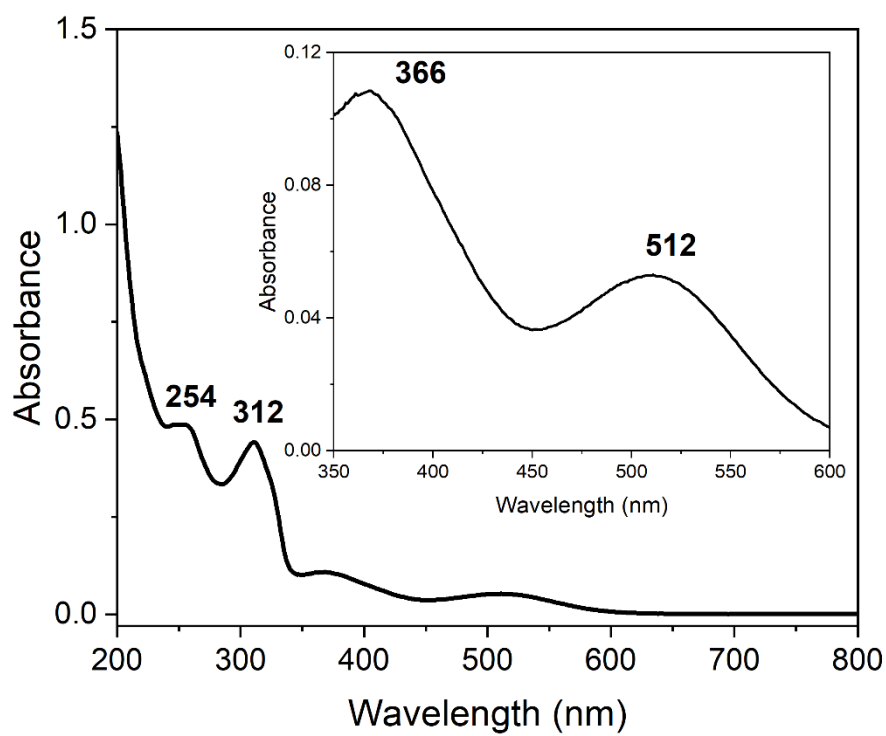

**Figure S3az:** Absorption spectrum of **3e** (0.1  $\mu\text{M}$  in acetonitrile); inset shows the zoomed region of 350–600 nm.

**Table S6:** Absorption maxima and molar absorption coefficients of the ligands and metal complexes in 1mM acetonitrile solution; the carbonyl frequencies of the metal complexes, compared with the standard **Rebpy**.

| Ligand    | $\lambda_{\max}/ \text{nm} (\epsilon \times 10^3 \text{ Lmol}^{-1}\text{cm}^{-1})$ | Re(I) complex | $\lambda_{\max}/ \text{nm} (\epsilon \times 10^3 \text{ Lmol}^{-1}\text{cm}^{-1})$ | $\nu_{\text{str}} (\text{C}=\text{O}) (\text{cm}^{-1})$ |
|-----------|------------------------------------------------------------------------------------|---------------|------------------------------------------------------------------------------------|---------------------------------------------------------|
| <b>2a</b> | 237 (11.2)<br>285 (9.20)<br>363 (0.70)<br>455 (0.28)                               | <b>3a</b>     | 248 (4.96)<br>309 (4.38)<br>363 (1.10)<br>505 (0.52)                               | 2009, 1896,<br>1874                                     |
| <b>2b</b> | 207 (12.6)<br>238 (10.8)<br>285 (7.96)<br>348 (1.58)<br>447 (0.28)                 | <b>3b</b>     | 206 (12.4)<br>249 (6.10)<br>306 (4.40)<br>324 (3.42)<br>505 (0.49)                 | 2008, 1884,<br>1868                                     |
| <b>2c</b> | 239 (14.5)<br>288 (13.4)<br>361 (0.10)<br>453 (0.04)                               | <b>3c</b>     | 252 (8.62)<br>305 (7.32)<br>332 (5.42)<br>369 (1.67)<br>503 (0.81)                 | 2007, 1872                                              |
| <b>2d</b> | 240 (6.27)<br>292 (5.41)<br>359 (0.35)<br>456 (0.17)                               | <b>3d</b>     | 247 (4.41)<br>317 (3.89)<br>339 (3.04)<br>371 (0.97)<br>513 (0.51)                 | 2006, 1883                                              |
| <b>2e</b> | 248 (5.1)<br>284 (10.7)<br>366 (0.97)<br>454 (0.47)                                | <b>3e</b>     | 254 (4.89)<br>312 (4.49)<br>366 (1.11)<br>512 (0.57)                               | 2020, 1919, 1892                                        |
|           |                                                                                    | <b>Rebpy</b>  |                                                                                    | 2010, 1989, 1867                                        |

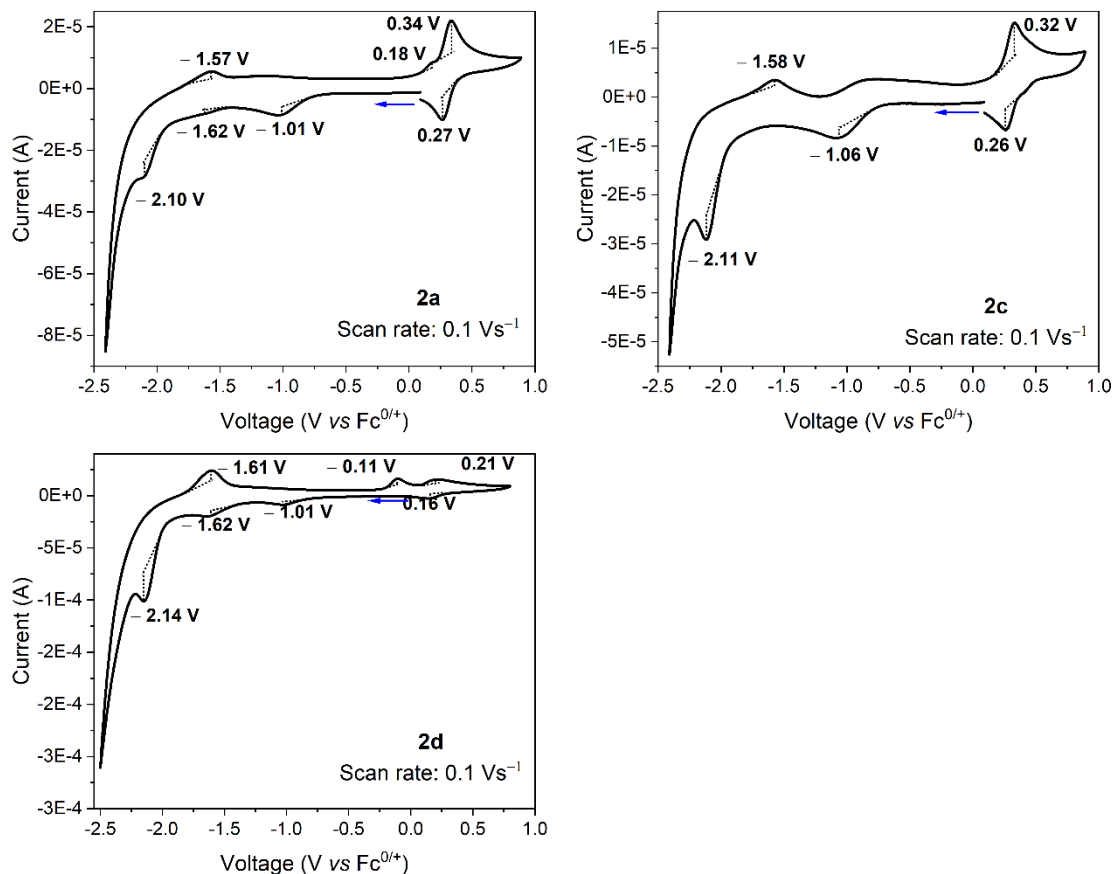

**Figure S4:** Cyclic voltammograms of **2a**, **2c**, and **2d** in argon (1 mM of ligand in 100 mM of TBABF<sub>4</sub> in acetonitrile; WE: glassy carbon, CE: Pt wire, RE: pseudo Ag|Ag<sup>+</sup> non-aqueous electrode); potentials are shown with reference to ferrocene as internal standard. The peaks in the region of -1.05 V to 0 V could not be assigned.

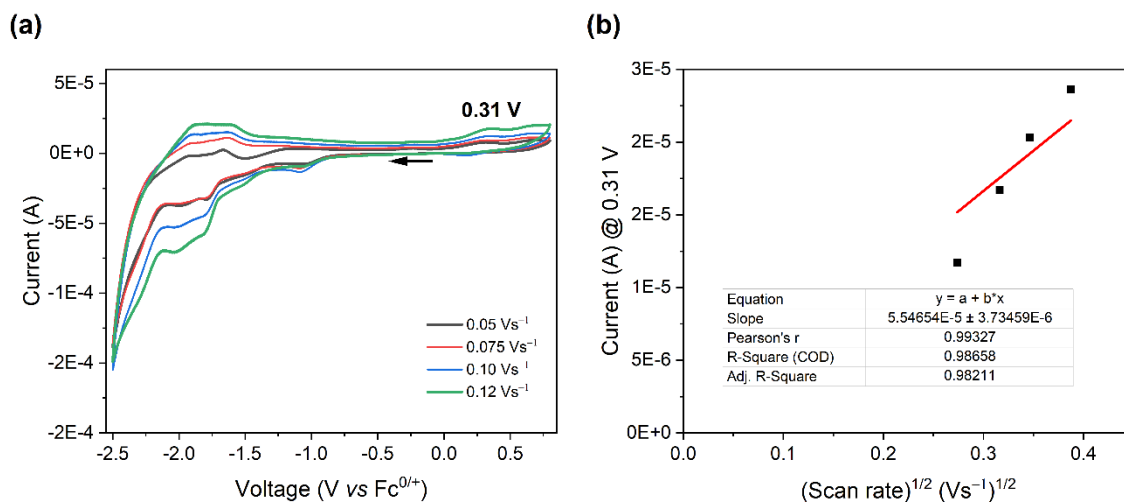

**Figure S5:** (a) CV of **3a** in scan rates of 0.05 to 0.15 Vs<sup>-1</sup> in acetonitrile solution under argon; (b) Peak currents for the ferrocene oxidative step (~0.40 V) vs the square root of the scan rate.

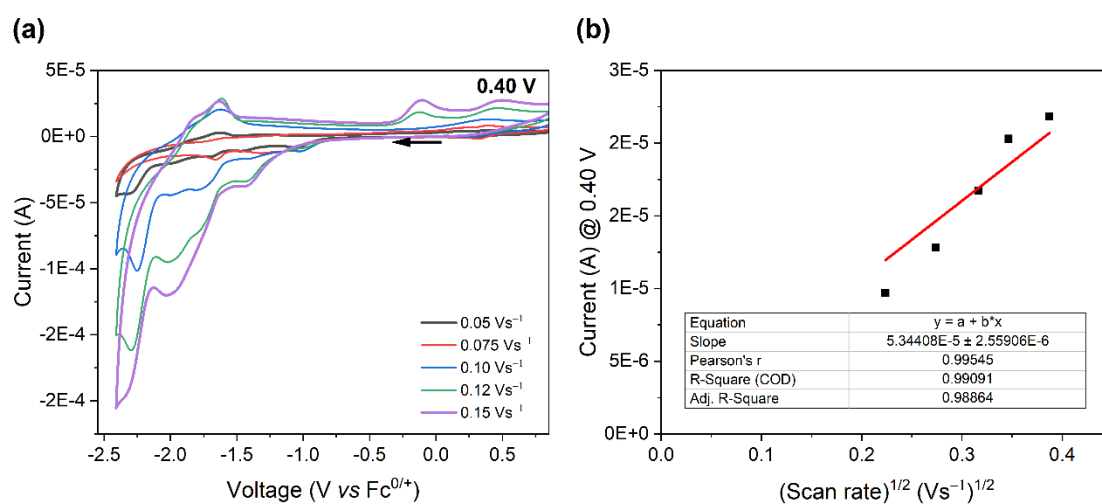

**Figure S6:** (a) CV of **3b** in scan rates of 0.05 to 0.12 Vs<sup>-1</sup> in acetonitrile solution under argon; (b) Peak currents for the ferrocene oxidative step (~0.31 V) vs the square root of the scan rate.

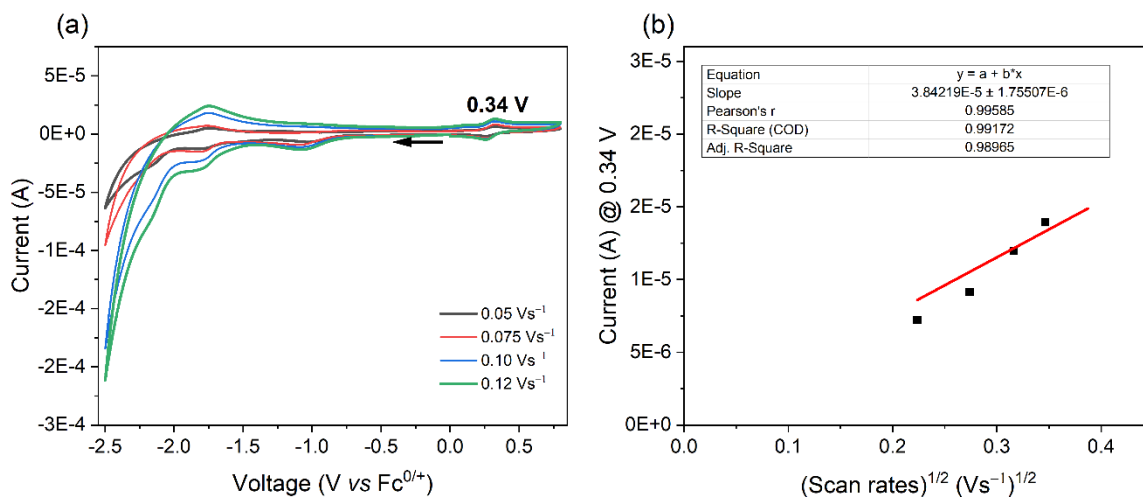

**Figure S7:** (a) CV of **3c** in scan rates of 0.05 to 0.12  $\text{Vs}^{-1}$  in acetonitrile solution under argon; (b) Peak currents for the ferrocene oxidative step ( $\sim 0.32$  V) vs the square root of the scan rate.

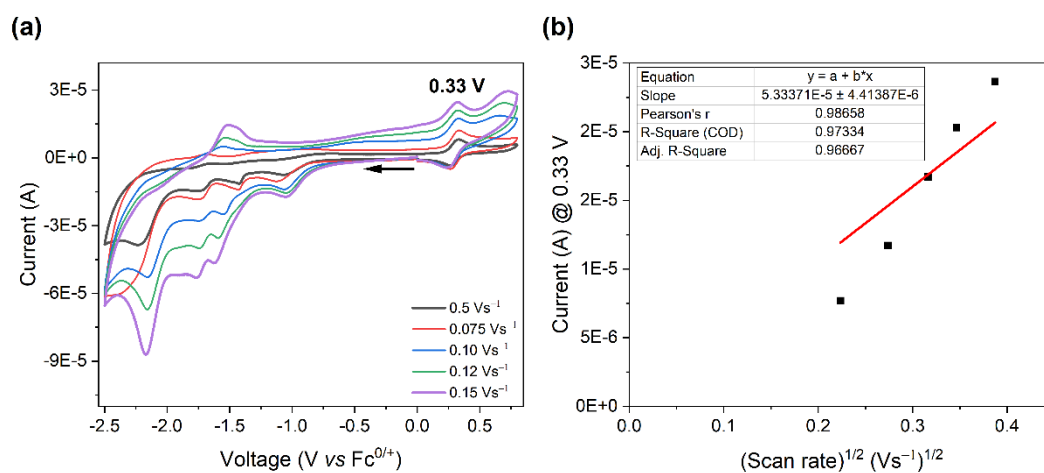

**Figure S8:** (a) CV of **3d** in scan rates of 0.05 to 0.15  $\text{Vs}^{-1}$  in acetonitrile solution under argon; (b) Peak currents for the ferrocene oxidative step ( $\sim -1.78$  V) vs the square root of the scan rate.

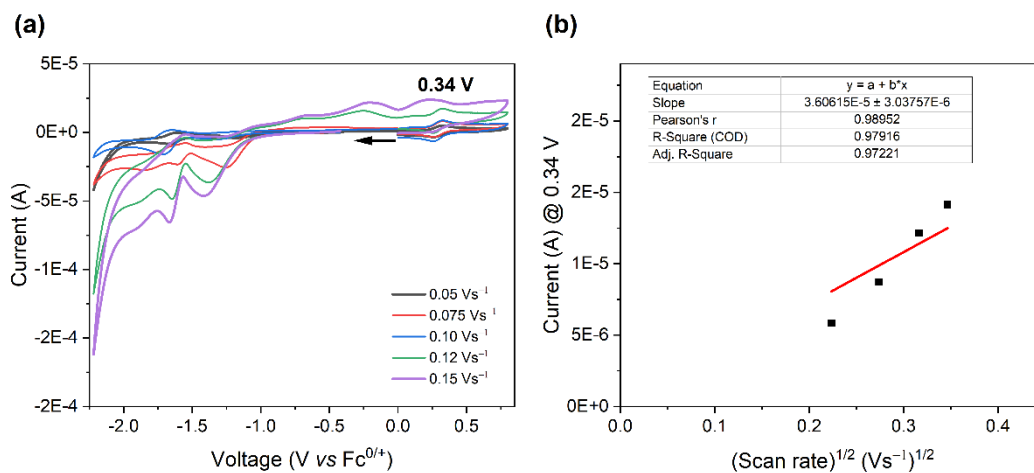

**Figure S9:** (a) CV of **3e** in scan rates of 0.05 to 0.15 Vs<sup>-1</sup> in acetonitrile solution under argon; (b) Peak currents for the ferrocene oxidative step (~ 0.34 V) vs the square root of the scan rate.

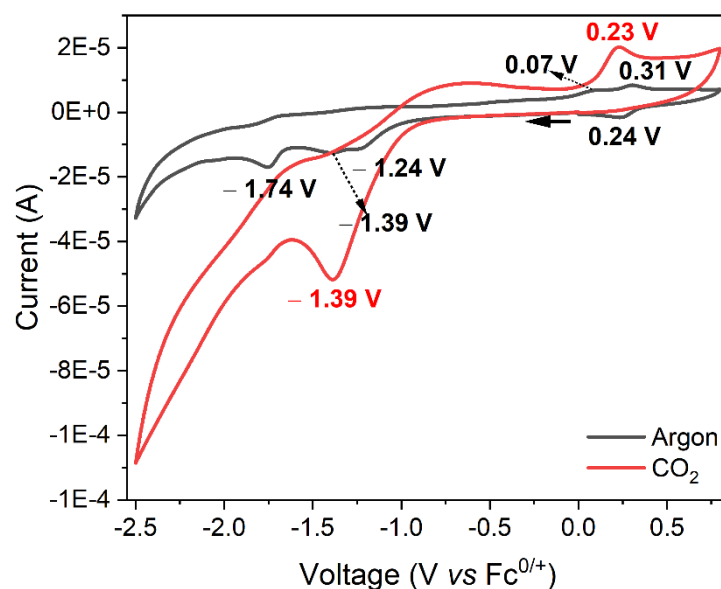

**Figure S10:** CV of **3a** in argon (1 mM of **3a** in 100 mM of TBABF<sub>4</sub> in acetonitrile; WE: glassy carbon, CE: Pt wire, RE: pseudo Ag|Ag<sup>+</sup> non-aqueous electrode, scan rate 0.1 Vs<sup>-1</sup>). The peaks observed in the range of -1.4 V to 0 V are currently not assigned to any electrochemical process.

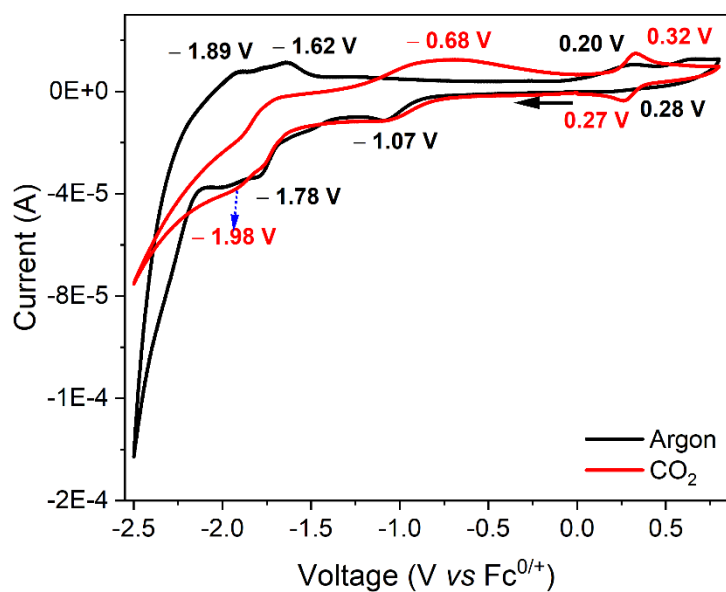

**Figure S11:** CV of **3b** in argon (1 mM of **3b** in 100 mM of TBABF<sub>4</sub> in acetonitrile; WE: glassy carbon, CE: Pt wire, RE: pseudo Ag|Ag<sup>+</sup> non-aqueous electrode, scan rate 0.1 Vs<sup>-1</sup>). The peaks observed in the range of -1.4 V to 0 V are currently not assigned to any electrochemical process.

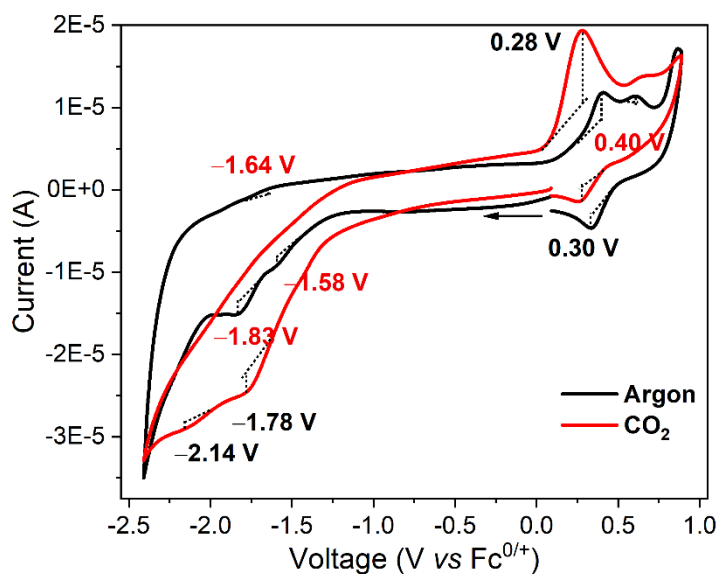

**Figure S12:** CV of **3c** in argon (1 mM of **3c** in 100 mM of TBABF<sub>4</sub> in acetonitrile; WE: glassy carbon, CE: Pt wire, RE: pseudo Ag|Ag<sup>+</sup> non-aqueous electrode, scan rate 0.1 Vs<sup>-1</sup>).

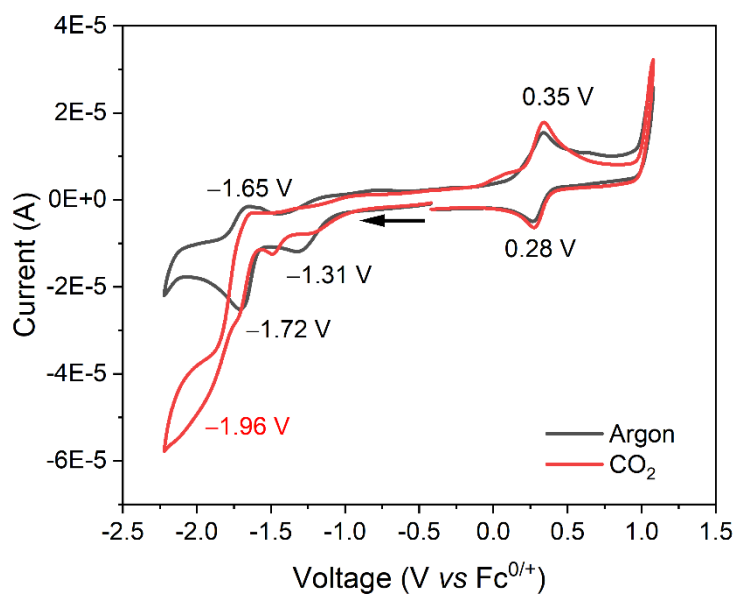

**Figure S13:** CV of **3e** in argon (1 mM of **3e** in 100 mM of TBABF<sub>4</sub> in acetonitrile; WE: glassy carbon, CE: Pt wire, RE: pseudo Ag|Ag<sup>+</sup> non-aqueous electrode, scan rate 0.1 Vs<sup>-1</sup>). The peaks observed in the range of -1.4 V to 0 V are currently not assigned to any electrochemical process.

**Table S7:** Catalytic parameter ( $i_{cat}/i_p$ ) calculated for the complexes at the tabulated potentials (scan rate 0.1 Vs<sup>-1</sup>) (all potentials reported are vs Fc<sup>0/+</sup>)

| Complex   | Potential (V vs Fc <sup>0/+</sup> ) | $i_{cat}/i_p$ |
|-----------|-------------------------------------|---------------|
| <b>3a</b> | -2.17                               | 4.63          |
| <b>3b</b> | -1.92                               | 1.08          |
| <b>3c</b> | -2.14                               | 1.50          |
| <b>3d</b> | -1.92                               | 4.03          |
| <b>3e</b> | -1.96                               | 2.60          |

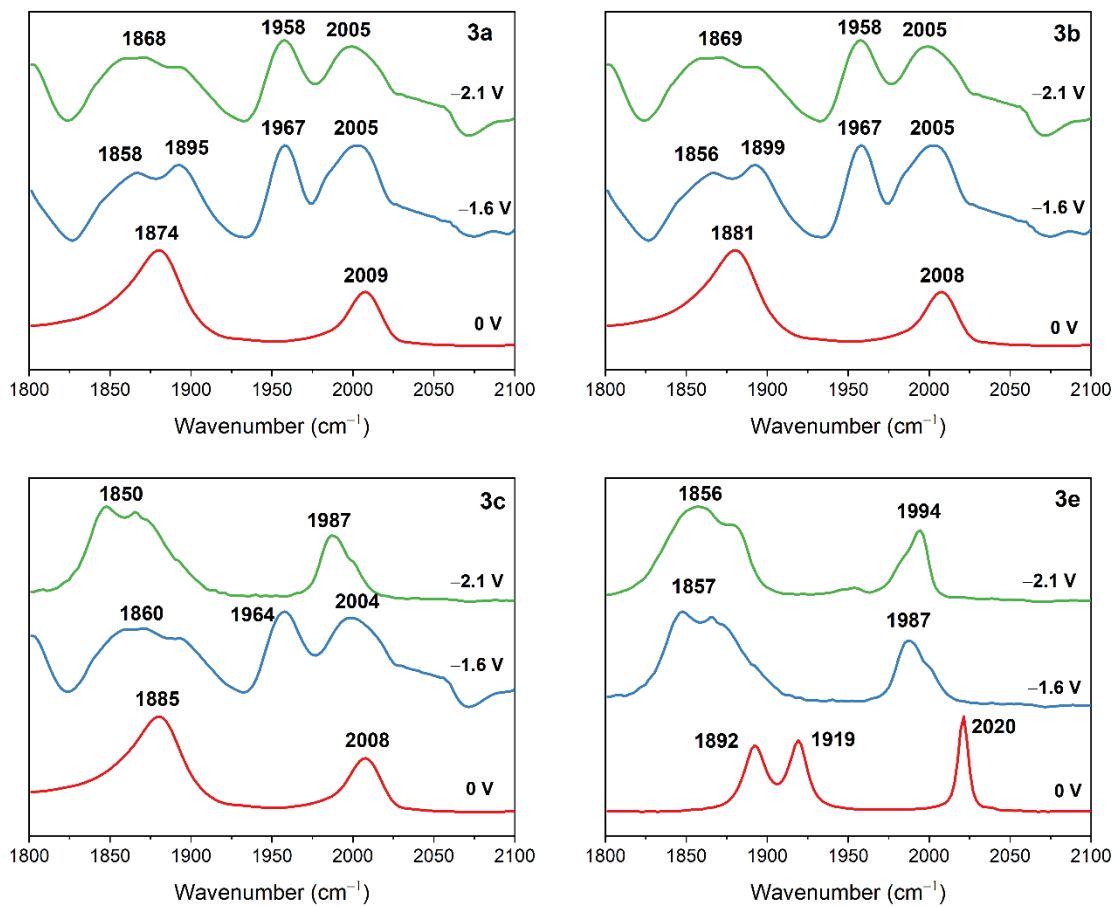

**Figure S14:** IRSEC spectra of **3a–c**, and **3e** (3 mM in 100 mM TBABF<sub>4</sub> in acetonitrile), at different potentials under argon atmosphere.

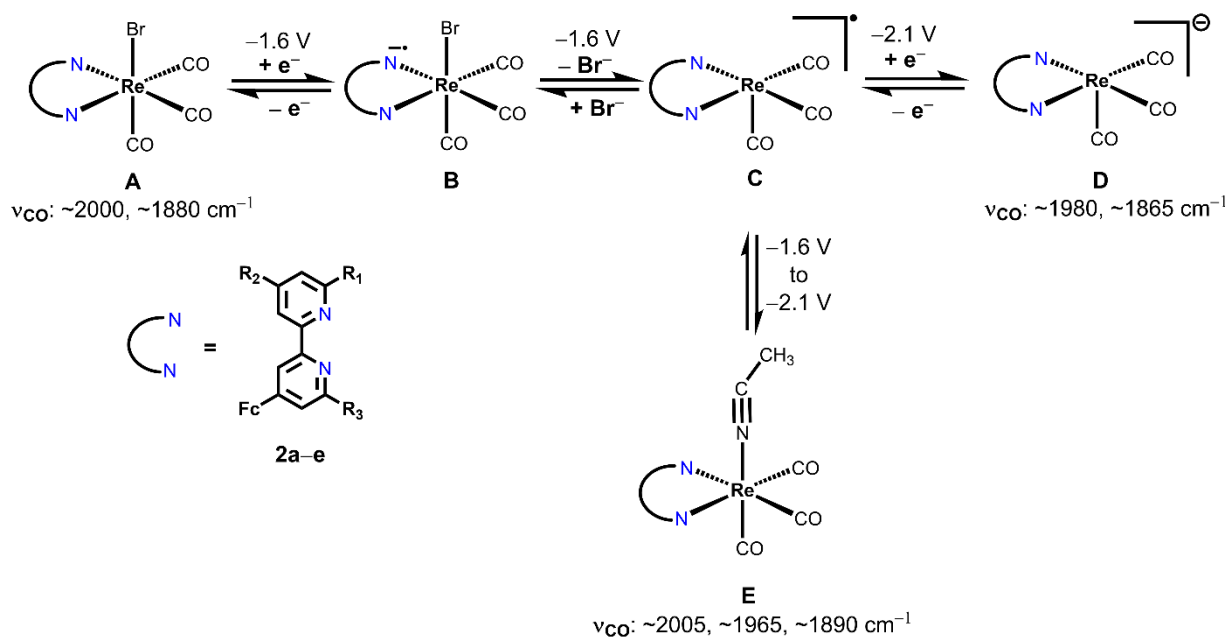

**Figure S15:** The proposed route of formation for the intermediates for **3a–e**, detected by IRSEC experiments. The species **E** is the catalytically active species, and species **D** can be present in equilibrium with it during the catalytic cycle.

**Table S8:** Photocatalytic CO<sub>2</sub> reduction by the Re complexes after 1 h visible light irradiation in the presence of [Ru(bpy)<sub>3</sub>]Cl<sub>2</sub><sup>(a)</sup>

| Sample       | CO (μmol)    | H <sub>2</sub> (μmol) | CO selectivity (%) <sup>(b)</sup> |
|--------------|--------------|-----------------------|-----------------------------------|
| <b>3a</b>    | 26.47 ± 0.43 | 2.04 ± 0.03           | 92.8                              |
| <b>3b</b>    | 20.66 ± 1.39 | 3.36 ± 0.30           | 86.0                              |
| <b>3c</b>    | 19.11 ± 0.76 | 3.43 ± 0.17           | 84.8                              |
| <b>3d</b>    | 26.55 ± 1.33 | 2.56 ± 0.07           | 91.2                              |
| <b>3e</b>    | 24.14 ± 0.67 | 3.18 ± 0.36           | 88.4                              |
| <b>2e</b>    | 2.22 ± 0.03  | 0.202 ± 0.002         | 91.7                              |
| <b>Rebpy</b> | 35.04 ± 1.90 | 0                     | 100                               |

<sup>(a)</sup>Reaction conditions: 0.1 mM Re catalyst, 4 mL of MeCN/TEOA (9:1 v/v), 0.1 mM photosensitizer, 10 mM BIH, visible light (100 mW cm<sup>2</sup>, AM 1.5G, λ > 400 nm), and 1 h irradiation.

$$\text{CO selectivity} = \frac{\text{CO } \mu\text{mol}}{\text{CO } \mu\text{mol} + \text{H}_2 \mu\text{mol}} \times 100\%$$

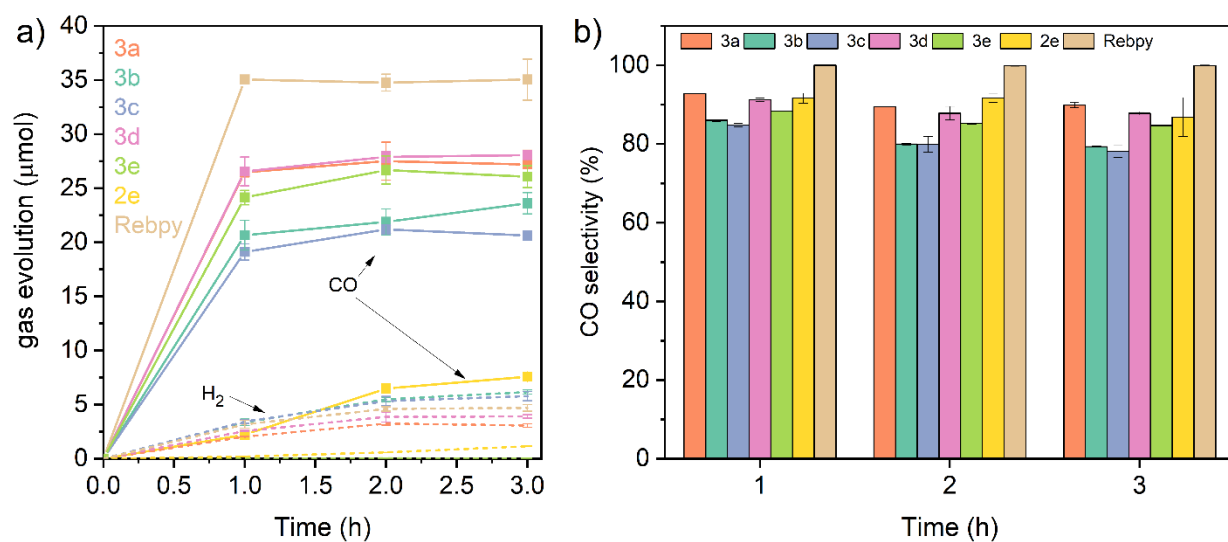

**Figure S16:** Photocatalytic CO<sub>2</sub> reduction by **3a-e** over longer duration. Figure (a) shows the generation of CO and H<sub>2</sub> over 3 hours visible light irradiation. The solid and dashed lines show CO and H<sub>2</sub> evolution traces, respectively. Figure (b) shows the CO selectivity of the catalysts after 1, 2 and 3 hours of irradiation.

## References:

- 1 A. M. Borys, *Organometallics*, 2023, **42**, 182–196.
- 2 O. V. Dolomanov, L. J. Bourhis, R. J. Gildea, J. a. K. Howard and H. Puschmann, *J. Appl. Crystallogr.*, 2009, **42**, 339–341.
- 3 G. M. Sheldrick, *Acta Crystallogr. Sect. Found. Adv.*, 2015, **71**, 3–8.
- 4 G. M. Sheldrick, *Acta Crystallogr. Sect. C Struct. Chem.*, 2015, **71**, 3–8.
- 5 A. L. Spek, *Acta Crystallogr. D Biol. Crystallogr.*, 2009, **65**, 148–155.
- 6 L. J. Farrugia, *J. Appl. Crystallogr.*, 2012, **45**, 849–854.
- 7 C. F. Macrae, I. Sovago, S. J. Cottrell, P. T. A. Galek, P. McCabe, E. Pidcock, M. Platings, G. P. Shields, J. S. Stevens, M. Towler and P. A. Wood, *J. Appl. Crystallogr.*, 2020, **53**, 226–235.
- 8 X. Wu, E. R. T. Tiekink, I. Kostetski, N. Kocherginsky, A. L. C. Tan, S. B. Khoo, P. Wilairat and M.-L. Go, *Eur. J. Pharm. Sci.*, 2006, **27**, 175–187.
- 9 S. M. Delgado-Rivera, G. E. Pérez-Ortiz, A. Molina-Villarino, F. Morales-Fontán, L. M. García-Santos, A. M. González-Albó, A. R. Guadalupe and I. Montes-González, *Inorganica Chim. Acta*, 2017, **468**, 245–251.
- 10 E. C. Constable, A. J. Edwards, R. Martínez-Mañez and P. R. Raithby, *J. Chem. Soc. Dalton Trans.*, 1995, 3253–3261.
- 11 S. Saha, T. Doughty, D. Banerjee, S. K. Patel, D. Mallick, E. S. S. Iyer, S. Roy and R. Mitra, *Dalton Trans.*, 2023, **52**, 15394–15411.
- 12 Z. Meng, C.-L. Ho, H.-F. Wong, Z.-Q. Yu, N. Zhu, G. Li, C.-W. Leung and W.-Y. Wong, *Sci. China Mater.*, 2019, **62**, 566–576.
- 13 E. E. Benson and C. P. Kubiak, *Chem. Commun.*, 2012, **48**, 7374–7376.
- 14 G. R. Fulmer, A. J. M. Miller, N. H. Sherden, H. E. Gottlieb, A. Nudelman, B. M. Stoltz, J. E. Bercaw and K. I. Goldberg, *Organometallics*, 2010, **29**, 2176–2179.
